# Supplementary material for: Novel α-amino acid-derived phase-transfer catalyst application to a highly enantio- and diastereoselective nitro-Mannich reaction
Source: Royal Society of Chemistry journal article supplement (doi:10.1039/c7ob02501g), 2017-01-01
Supplement: c7ob02501g1.pdf [file c7ob02501g1.pdf]

## Supporting Information

# Novel $\alpha$ -Amino Acid-derived Phase-Transfer Catalysts Bearing Multiple Hydrogen Bonding Donors: Synthesis and Application to Highly Enantio- and diastereoselective Nitro-Mannich Reaction

Yuxin Liu, Zhonglin Wei, Yu Liu, Jungang Cao, Dapeng Liang, Yingjie Lin,\*  
and Haifeng Duan\*.

*Department of Organic Chemistry, College of Chemistry, Jilin University,  
2699 Qianjin Street, Changchun 130012, China.*

E-mail: [linyinj@jlu.edu.cn](mailto:linyinj@jlu.edu.cn); [duanhf@jlu.edu.cn](mailto:duanhf@jlu.edu.cn); Tel: 0431-85168398;

### Table of Contents

|                                                                      |    |
|----------------------------------------------------------------------|----|
| 1. Supplementary experiment .....                                    | 1  |
| 2. NMR of supplementary experiment .....                             | 4  |
| 3. HPLC traces of supplementary experiment .....                     | 9  |
| 4. NMR and HRMS spectra of asymmetric phase-transfer catalysts ..... | 11 |
| 5. NMR spectra of addition products .....                            | 24 |
| 6. HPLC traces of all compounds .....                                | 36 |

#### 1. Supplementary experiment

Preparation and characterization unknown amidosulfones

General Procedure

To a solution of aldehyde (1.0 eq.),  $\text{PhSO}_2\text{Na}$  (1.0 eq.) and  $\text{BocNH}_2$  in THF/ $\text{H}_2\text{O}$  (1:2.5, 0.7 M), was added  $\text{HCO}_2\text{H}$  (6.4 eq.) at rt. The mixture was stirred at rt for 72-96h. The resulting mixture was then diluted with  $\text{H}_2\text{O}$  and extracted with ethyl acetate. The combined organic layers were washed with saturated aqueous  $\text{NaHCO}_3$ , dried over

anhydrous Na<sub>2</sub>SO<sub>4</sub>, and evaporated under reduced pressure. The residue was washed with hexane/ ether (4:1) or hexane/THF (4:1). The corresponding  $\alpha$ -phenylsulfonylcarbamate.

Amidosulfones **4q** derived from 2-(benzyloxy)acetaldehyde

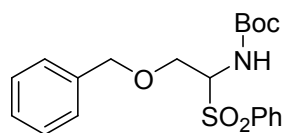

White solid, 424mg, 33% yield, mp = 127-128 °C

<sup>1</sup>H NMR (300 MHz, CDCl<sub>3</sub>)  $\delta$  7.97 – 7.85 (m, 2H), 7.69 – 7.59 (m, 1H), 7.57 – 7.46 (m, 2H), 7.40 – 7.27 (m, 5H), 5.51 (d,  $J$  = 11.2 Hz, 1H), 5.13 – 4.93 (m, 1H), 4.66 – 4.50 (m, 2H), 4.19 (dd,  $J$  = 10.7, 3.8 Hz, 1H), 3.91 (dd,  $J$  = 11.0, 4.3 Hz, 1H), 1.27 (s, 9H).

<sup>13</sup>C NMR (126 MHz, CDCl<sub>3</sub>)  $\delta$  153.88, 137.65, 137.19, 134.03, 129.37, 129.16, 128.62, 128.13, 128.00, 81.05, 73.78, 70.28, 65.71, 28.15.

**HRMS** (ESI): calculated for C<sub>20</sub>H<sub>25</sub>NNaO<sub>5</sub>S [M+Na]<sup>+</sup>: 414.1346 found 414.1346

Amidosulfones **4r** derived from 2-(1,3-dioxisoindolin-2-yl)acetaldehyde

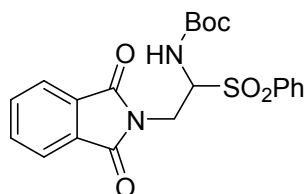

White solid, 230mg, 20% yield, mp = 158-159 °C

<sup>1</sup>H NMR (300 MHz, CDCl<sub>3</sub>)  $\delta$  8.01 – 7.82 (m, 4H), 7.78 – 7.50 (m, 5H), 5.45 (d,  $J$  = 11.5 Hz, 1H), 5.33 – 5.13 (m, 1H), 4.43 – 4.20 (m, 2H), 1.12 (s, 9H).

<sup>13</sup>C NMR (126 MHz, CDCl<sub>3</sub>)  $\delta$  193.51, 167.80, 153.80, 136.66, 134.31, 131.76, 129.32, 129.23, 123.64, 81.07, 68.51, 35.28, 27.82.

**HRMS** (ESI): calculated for C<sub>21</sub>H<sub>22</sub>N<sub>2</sub>NaO<sub>6</sub>S [M+Na]<sup>+</sup>: 453.1091 found 414.1346

Amidosulfones **4s** derived from methyl 3-oxopropanoate

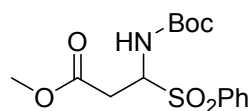

White solid, 467mg, 28% yield, mp = 132-133 °C

<sup>1</sup>H NMR (300 MHz, CDCl<sub>3</sub>)  $\delta$  7.97 – 7.88 (m, 2H), 7.70 – 7.49 (m, 3H), 5.72 (d,  $J$  = 10.3 Hz, 1H), 5.38 – 5.18 (m, 1H), 3.74 (s, 3H), 3.13 (dd,  $J$  = 16.4, 4.7 Hz, 1H), 2.94 (dd,  $J$  = 16.4, 7.5 Hz, 1H), 1.21 (s, 9H).

<sup>13</sup>C NMR (126 MHz, CDCl<sub>3</sub>)  $\delta$  169.61, 153.48, 136.37, 134.27, 129.58, 129.23, 81.04, 67.84, 52.55, 31.96, 28.05.

**HRMS** (ESI): calculated for C<sub>15</sub>H<sub>21</sub>NNaO<sub>6</sub>S [M+Na]<sup>+</sup>: 366.0982 found 366.0982.

### General procedure for enantioselective nitro-Mannich reaction

Without protection of inert gases, catalyst **3b** (5mol%) and amidosulfones (0.15 mmol) were dissolved in dry chloroform (1.5ml), nitroalkane (0.75 mmol, 5 eq.) was added, the mixture was cooled to  $-20\text{ }^{\circ}\text{C}$ , freshly grounded KOH (42.1 mg, 5 eq.) was added in one portion, the resulting suspension was vigorously stirred at  $-20\text{ }^{\circ}\text{C}$ . After 12 h, 2 ml sat. aq.  $\text{NaHCO}_3$  was added and the solution was allowed to warm to room temperature, the aqueous was extracted with ethylacetate (3x5ml), then the organic layer was dried over  $\text{Na}_2\text{SO}_4$ , filtered and concentrated under reduced pressure. The crude product was purified by flash chromatography (PE/EA).

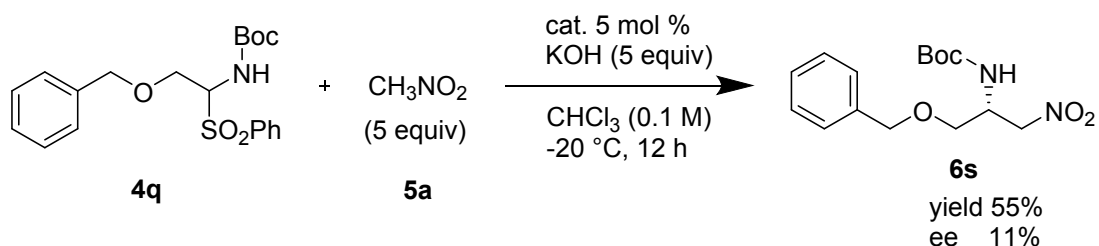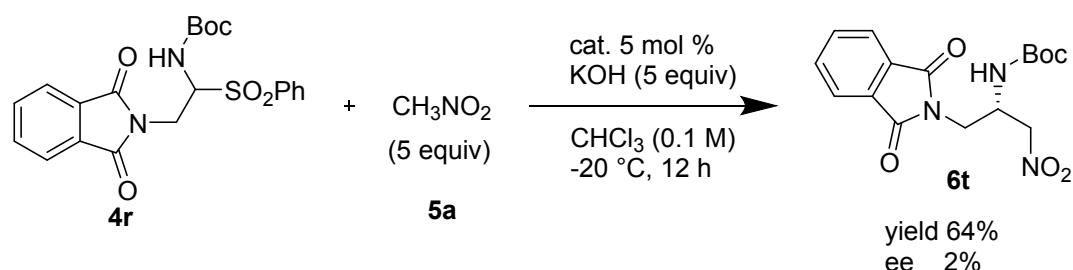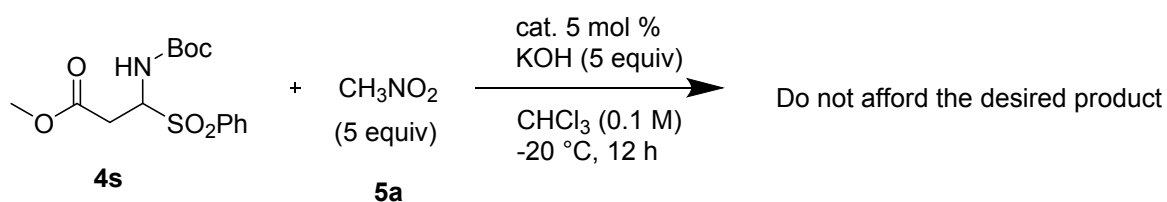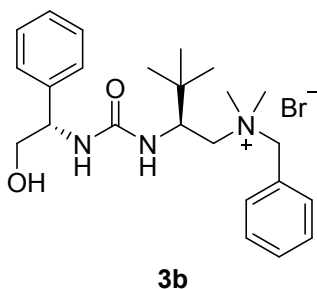

**Tert-butyl (R)-(1-(benzyloxy)-3-nitropropan-2-yl)carbamate (6s)**

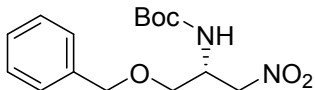 Colorless oil, 24.6 mg, 55% yield,  $[a]_D^{25} = 32.4$  ( $c = 0.5$ ,  $\text{CHCl}_3$ ), the ee value was 11% (Chiralpak AS-H, hexane/*i*-PrOH = 95:5, 214 nm, 1mL/min,  $t_{\text{major}} = 19.614$ ,  $t_{\text{minor}} = 22.830$  min).

$^1\text{H NMR}$  (500 MHz,  $\text{CDCl}_3$ )  $\delta$  7.42 – 7.27 (m, 5H), 5.09 (br, 1H), 4.67 – 4.54 (m, 2H), 4.52 (s, 2H), 4.42 (br, 1H), 3.68 – 3.52 (m, 2H), 1.44 (s, 9H).

$^{13}\text{C NMR}$  (126 MHz,  $\text{CDCl}_3$ )  $\delta$  154.91, 137.19, 128.58, 128.11, 127.80, 80.46, 75.34, 73.59, 68.81, 48.76, 28.26.

**HRMS** (ESI): calculated for  $\text{C}_{15}\text{H}_{22}\text{N}_2\text{NaO}_5$   $[\text{M}+\text{Na}]^+$ : 333.1421, found 333.1421.

**tert-butyl (S)-(1-(1,3-dioxisoindolin-2-yl)-3-nitropropan-2-yl)carbamate(6t)**

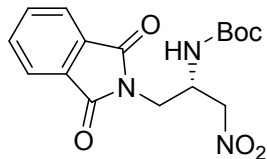 White solid, 34.6 mg, 64% yield, mp = 156-157 °C,  $[a]_D^{25} = 22$  ( $c = 0.5$ ,  $\text{CHCl}_3$ ), the ee value was 2% (Chiralpak OD-H, hexane/*i*-PrOH = 80:20, 214 nm, 1mL/min,  $t_{\text{major}} = 14.008$  min,  $t_{\text{minor}} = 17.009$  min).

$^1\text{H NMR}$  (500 MHz,  $\text{CDCl}_3$ )  $\delta$  7.94 – 7.86 (m, 2H), 7.81 – 7.72 (m, 2H), 5.26 (br, 1H), 4.77 – 4.60 (m, 2H), 4.52 (br, 1H), 4.14 – 4.01 (m, 1H), 4.00 – 3.85 (m, 1H), 1.35 (s, 9H).

$^{13}\text{C NMR}$  (126 MHz,  $\text{CDCl}_3$ )  $\delta$  168.22, 134.36, 131.74, 123.66, 80.58, 75.89, 48.51, 39.25, 28.07.

**HRMS** (ESI): calculated for  $\text{C}_{16}\text{H}_{19}\text{N}_3\text{NaO}_6$   $[\text{M}+\text{Na}]^+$ : 372.1166, found 372.1165.

## 2. NMR of supplementary experiment

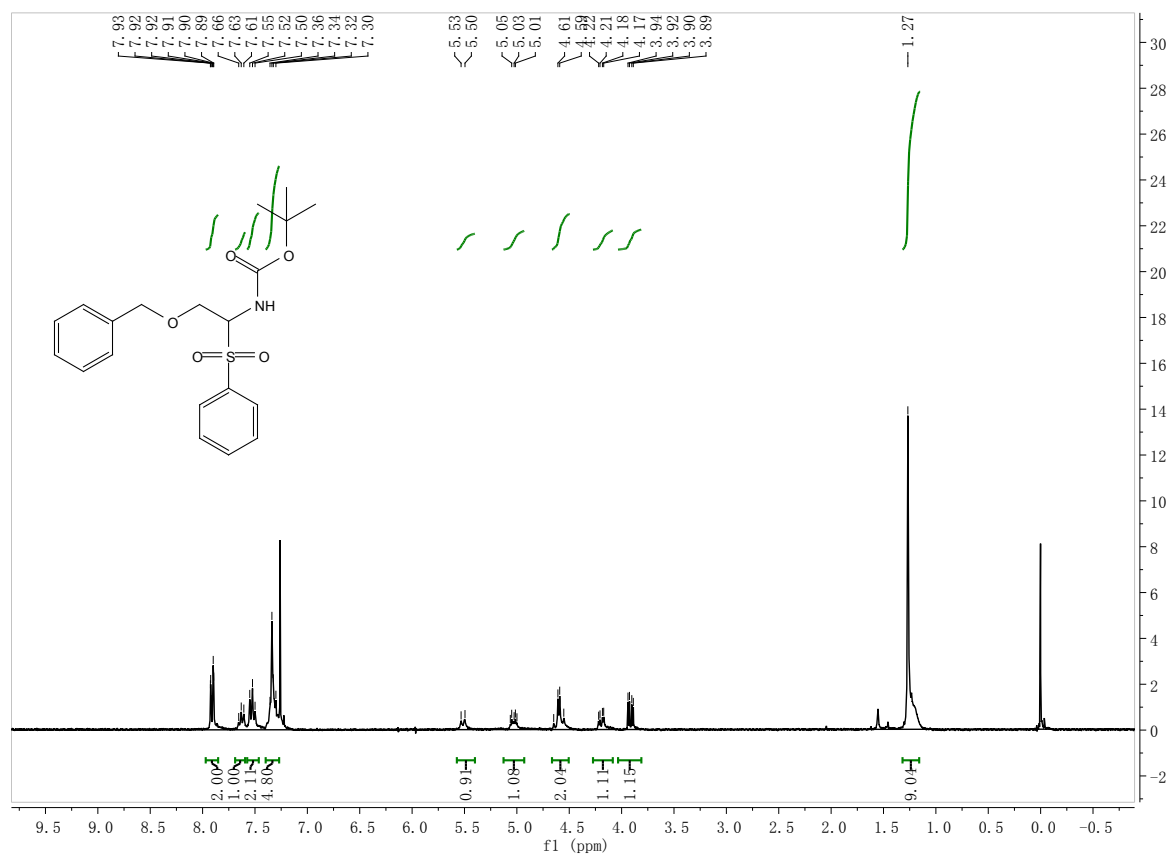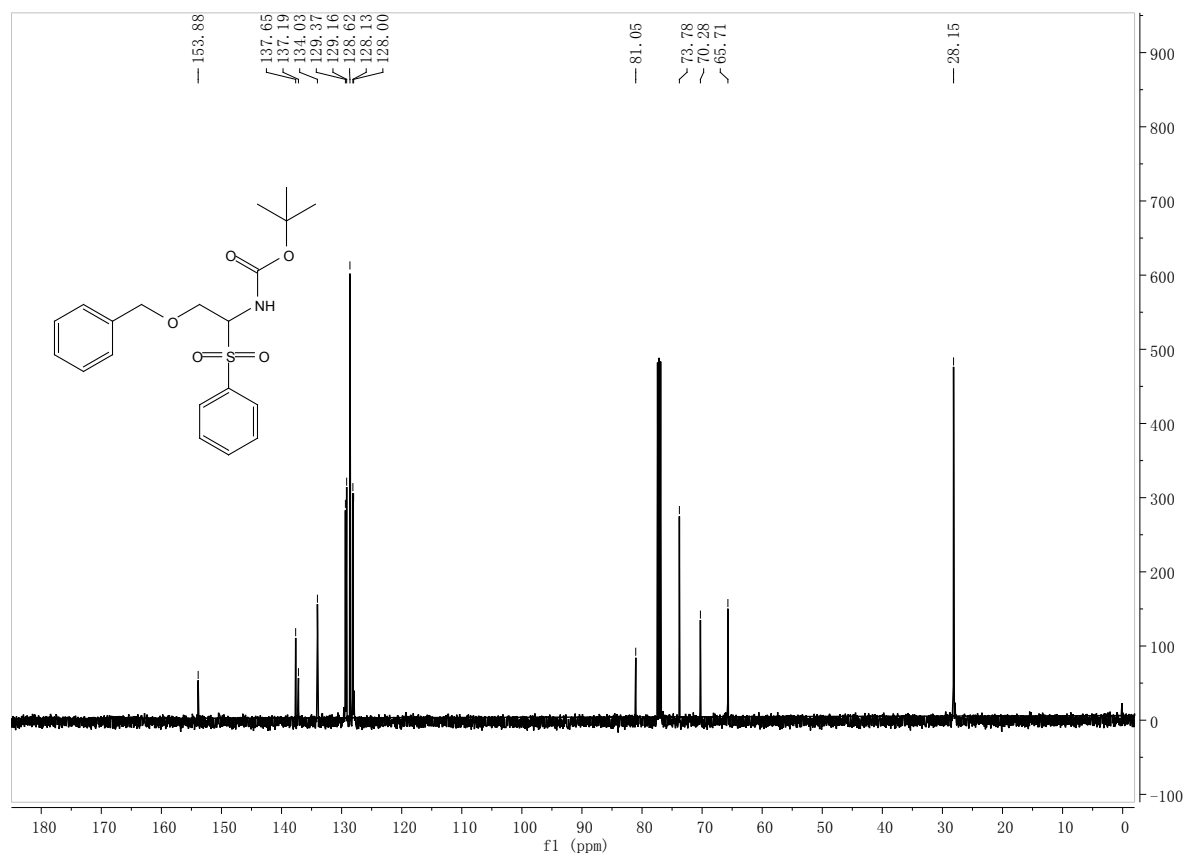

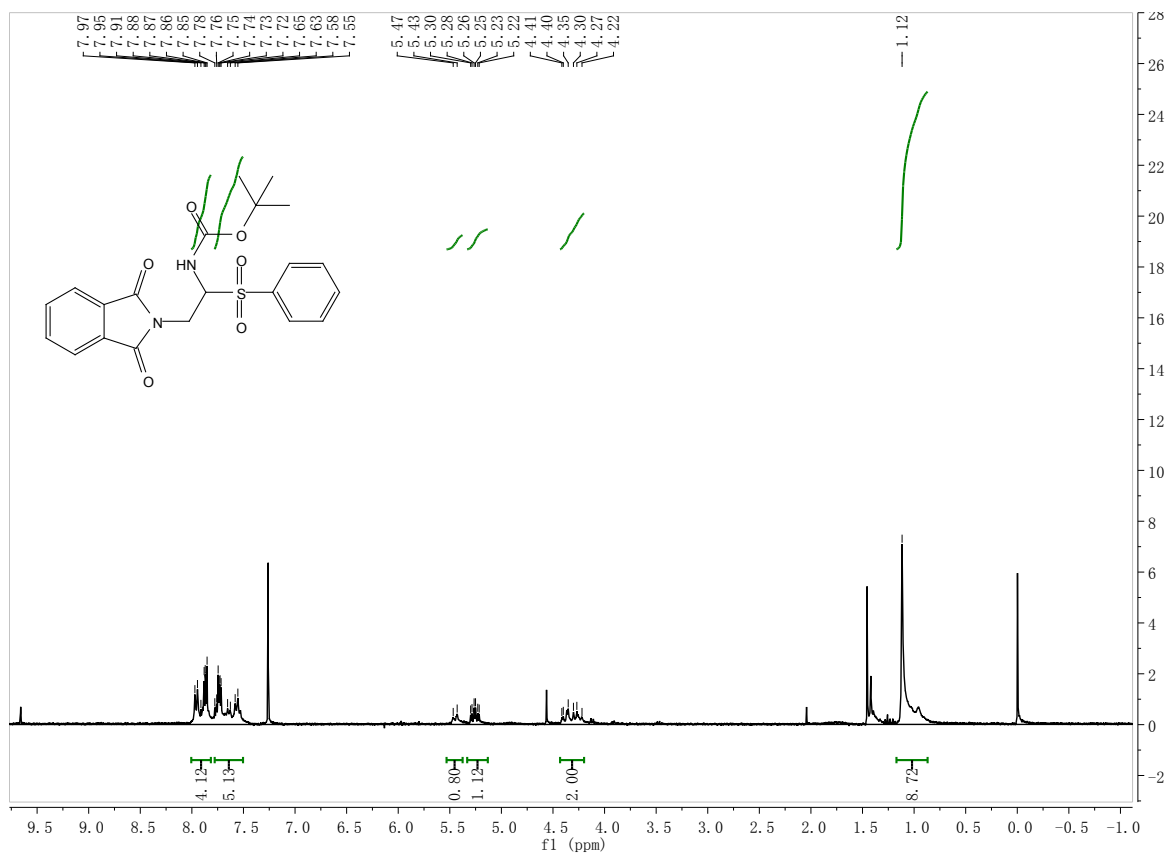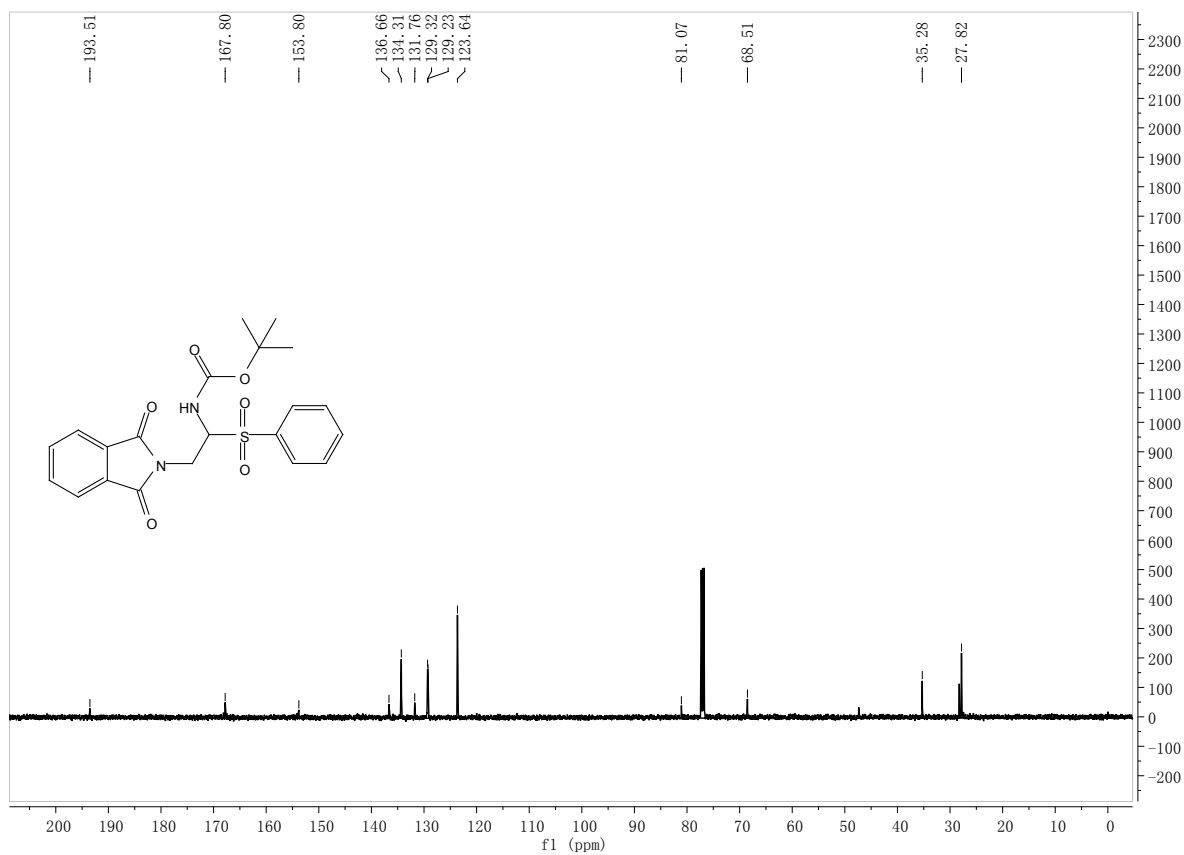

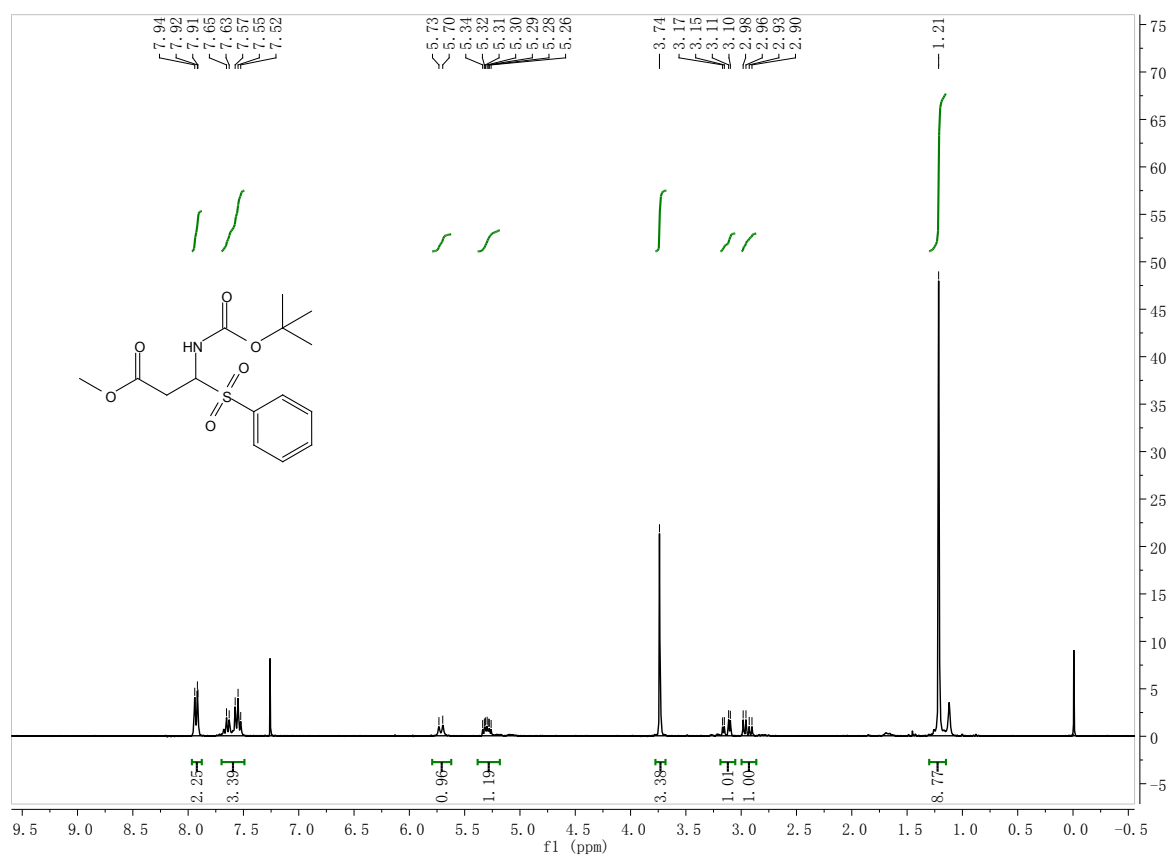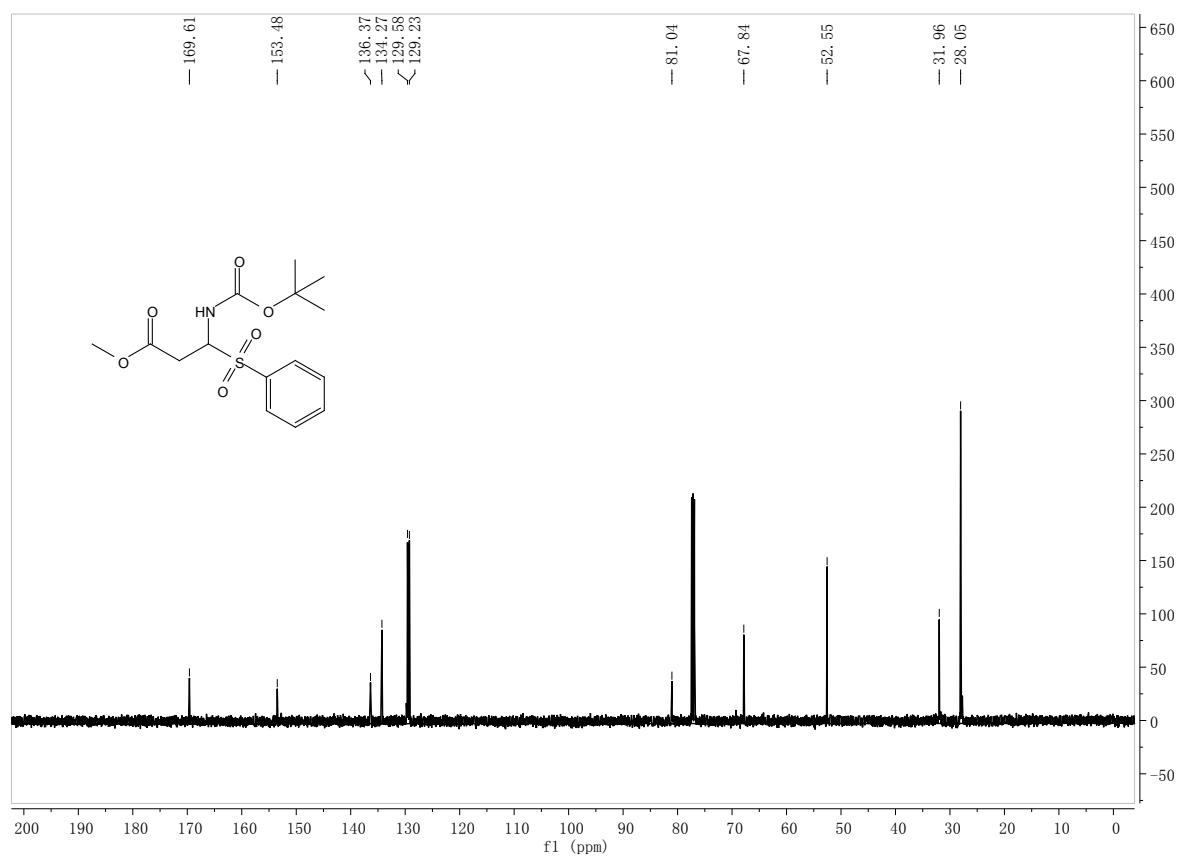

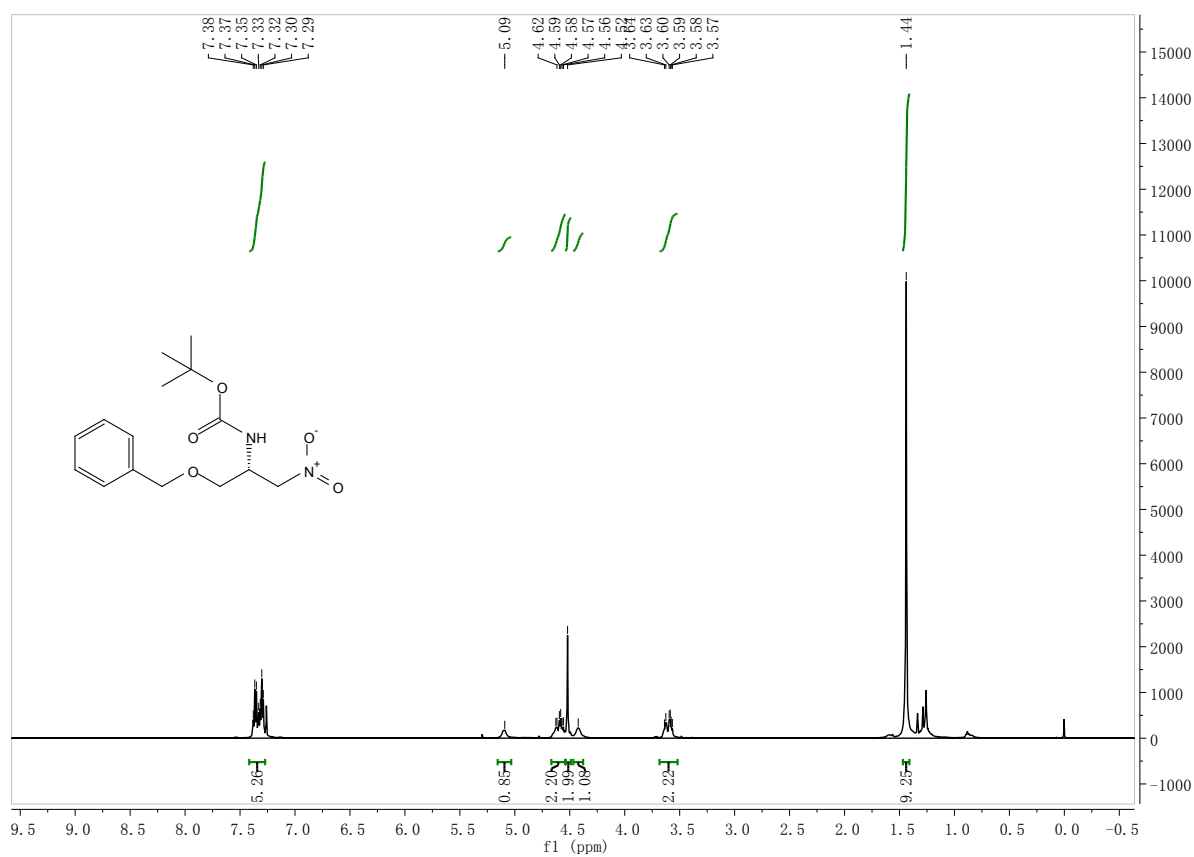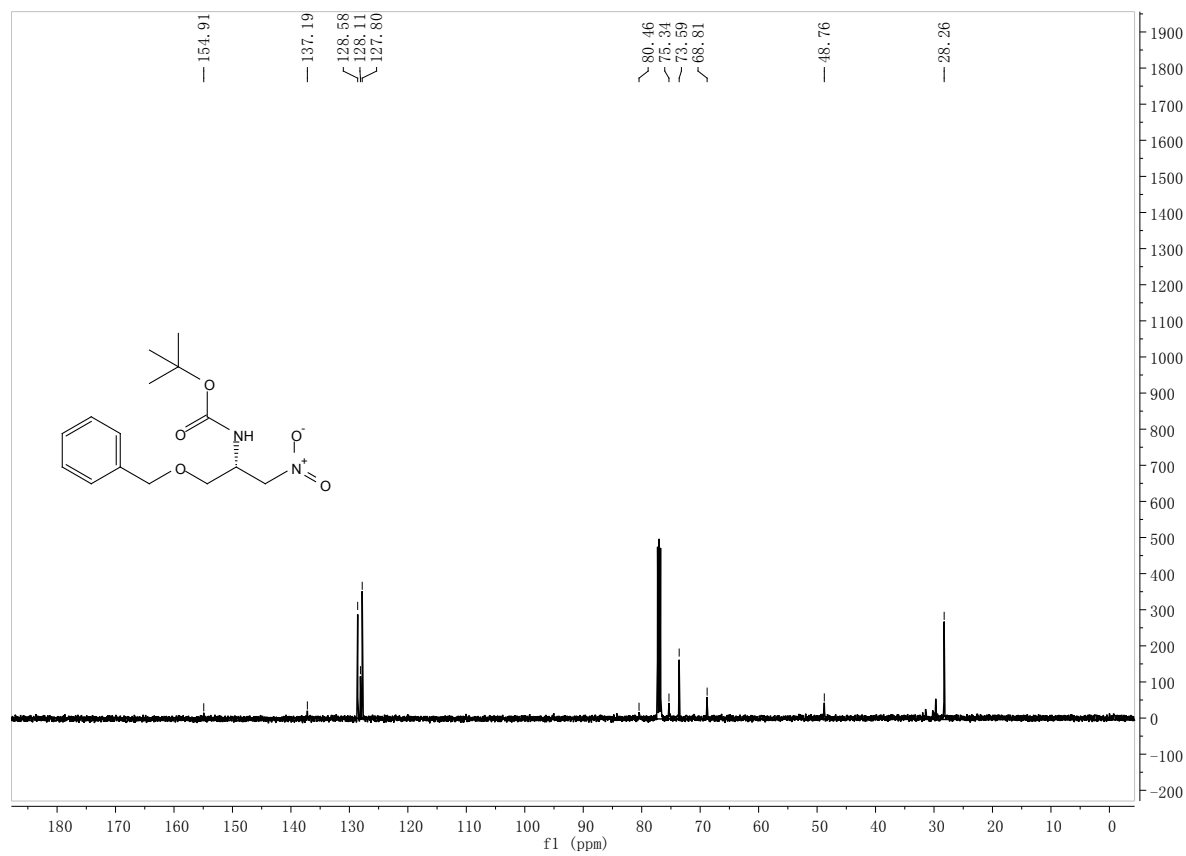



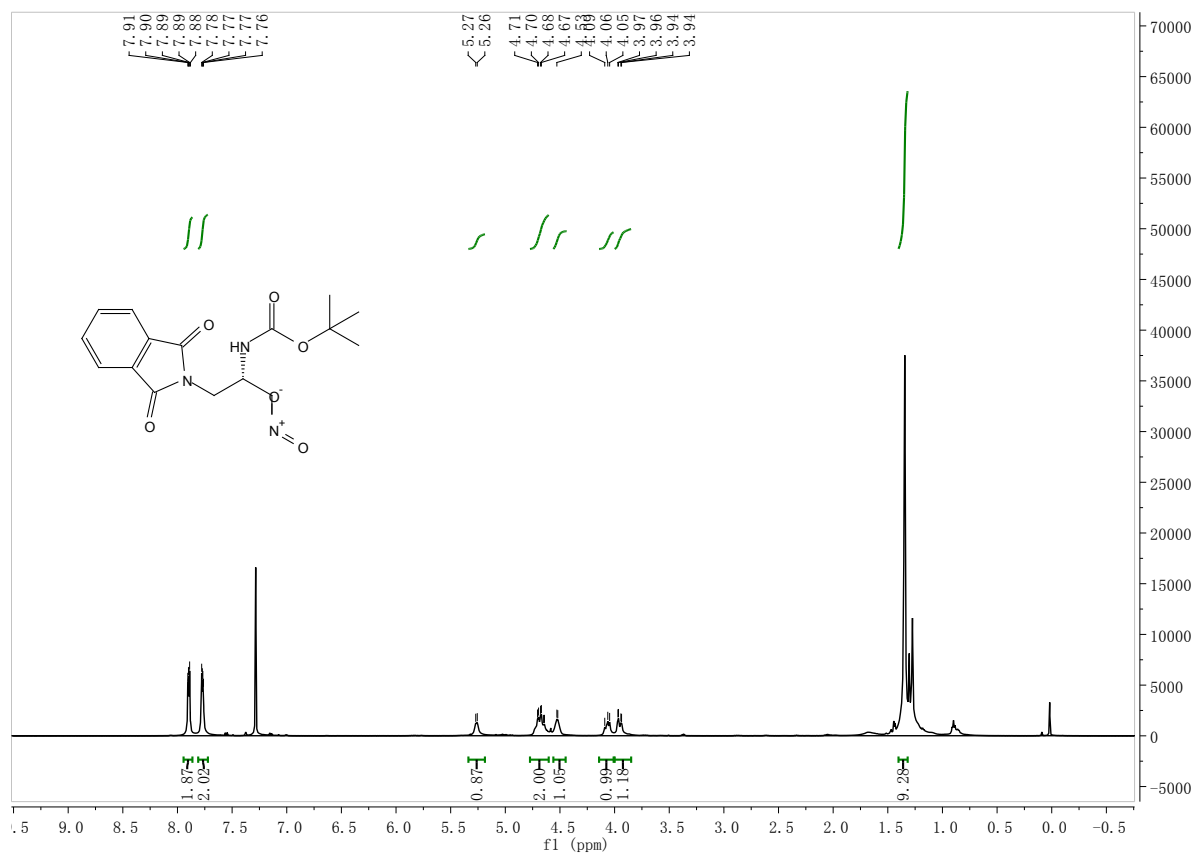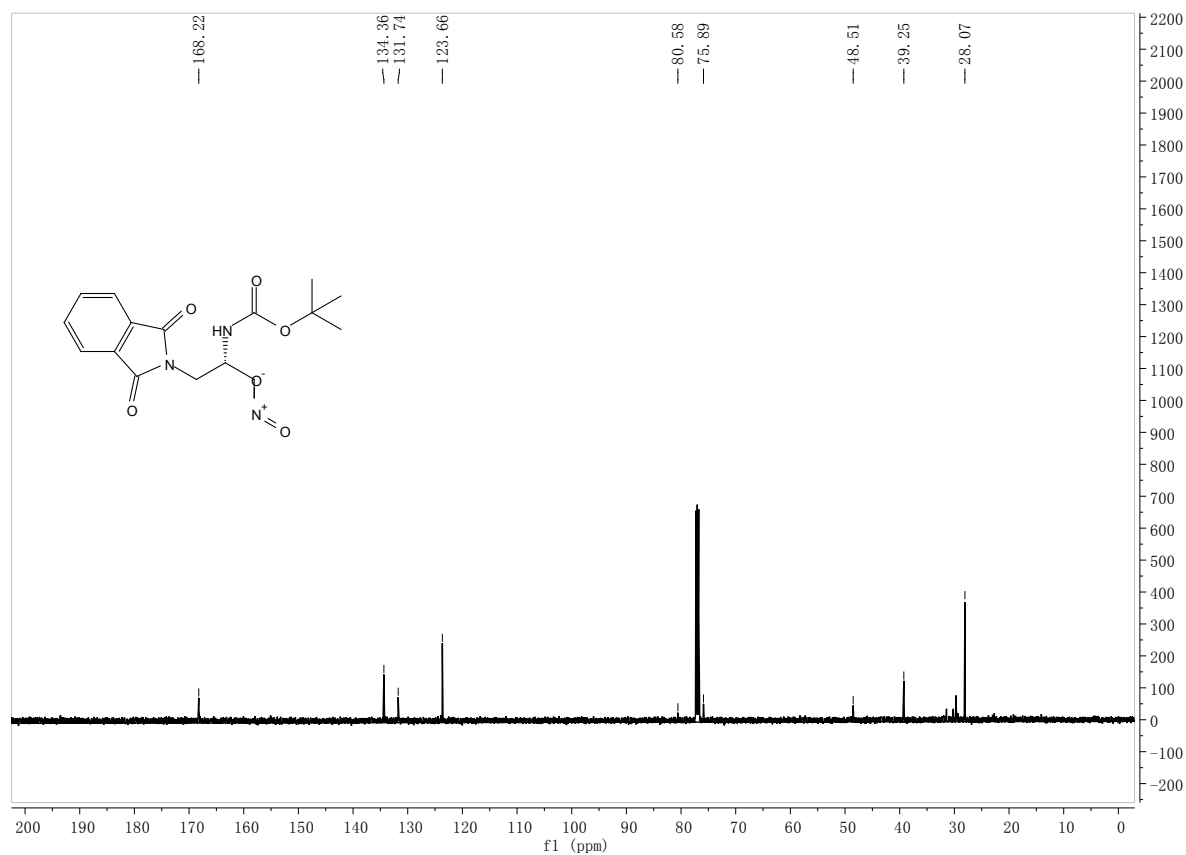

### 3. HPLC traces of supplementary experiment

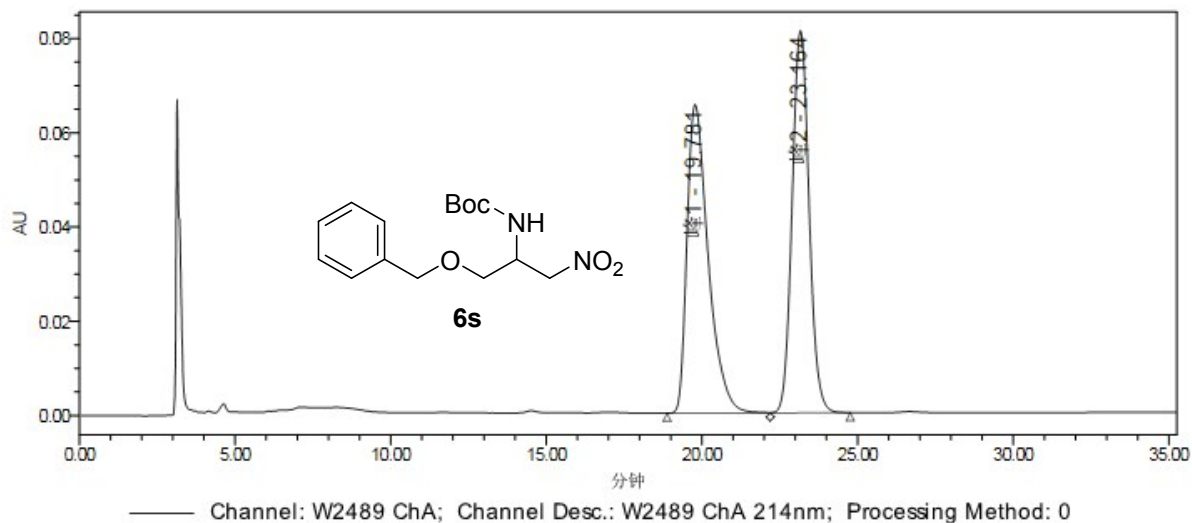

|   | Channel Description | Peak Name | RT (min) | Area (磺*sec) | % Area | Height (磺) |
|---|---------------------|-----------|----------|--------------|--------|------------|
| 1 | W2489 ChA 214nm     | 峰1        | 19.781   | 3097815      | 50.24  | 65467      |
| 2 | W2489 ChA 214nm     | 峰2        | 23.164   | 3067733      | 49.76  | 81022      |

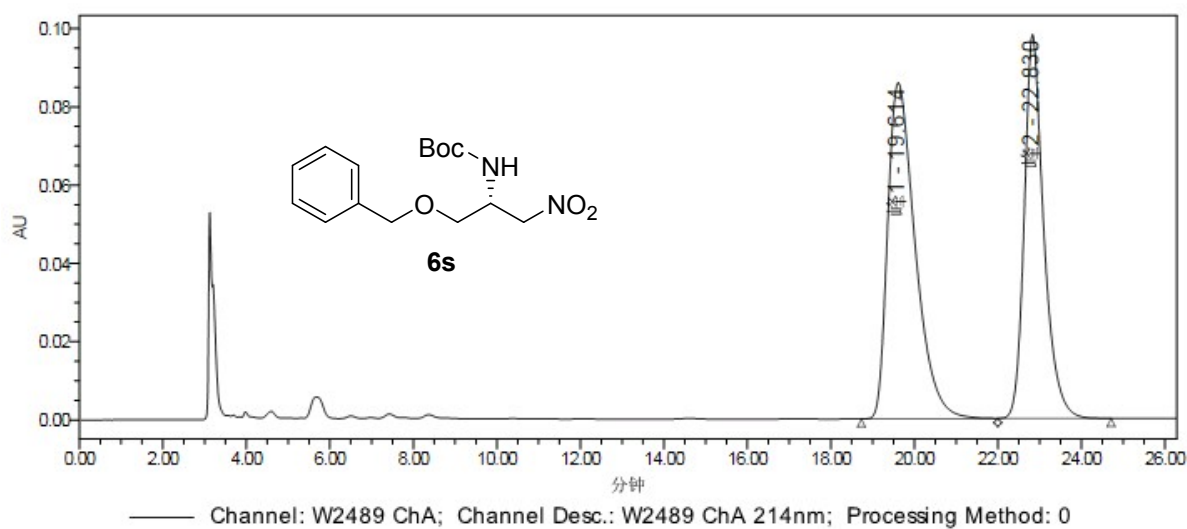

|   | Channel Description | Peak Name | RT (min) | Area (磺*sec) | % Area | Height (磺) |
|---|---------------------|-----------|----------|--------------|--------|------------|
| 1 | W2489 ChA 214nm     | 峰1        | 19.614   | 3940908      | 55.29  | 85850      |
| 2 | W2489 ChA 214nm     | 峰2        | 22.830   | 3186760      | 44.71  | 98098      |

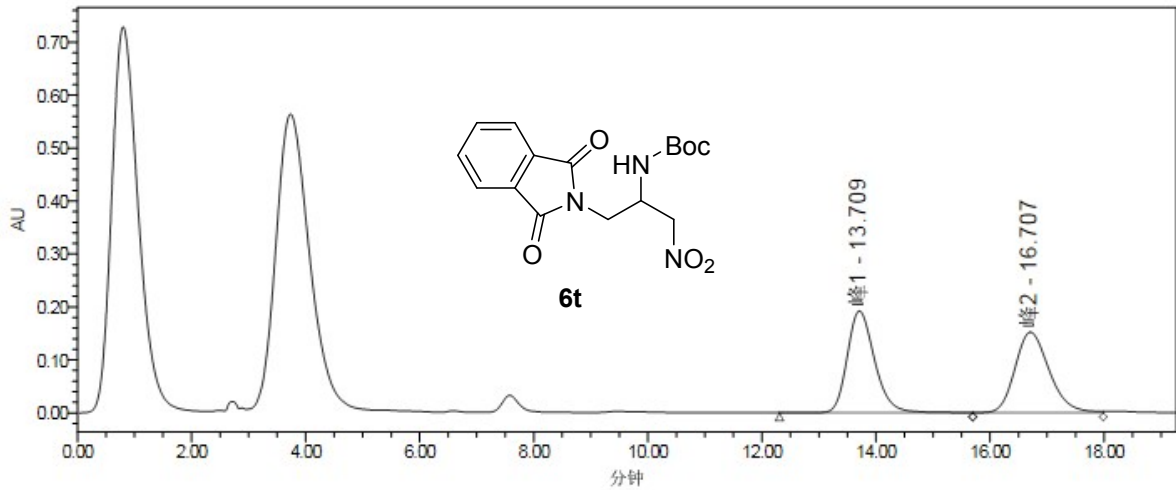

Channel: W2489 ChA; Channel Desc.: W2489 ChA 214nm; Processing Method: 0

|   | Channel Description | Peak Name | RT (min) | Area (磺*sec) | % Area | Height (磺) |
|---|---------------------|-----------|----------|--------------|--------|------------|
| 1 | W2489 ChA 214nm     | 峰1        | 13.709   | 6413642      | 50.30  | 192124     |
| 2 | W2489 ChA 214nm     | 峰2        | 16.707   | 6337694      | 49.70  | 152072     |

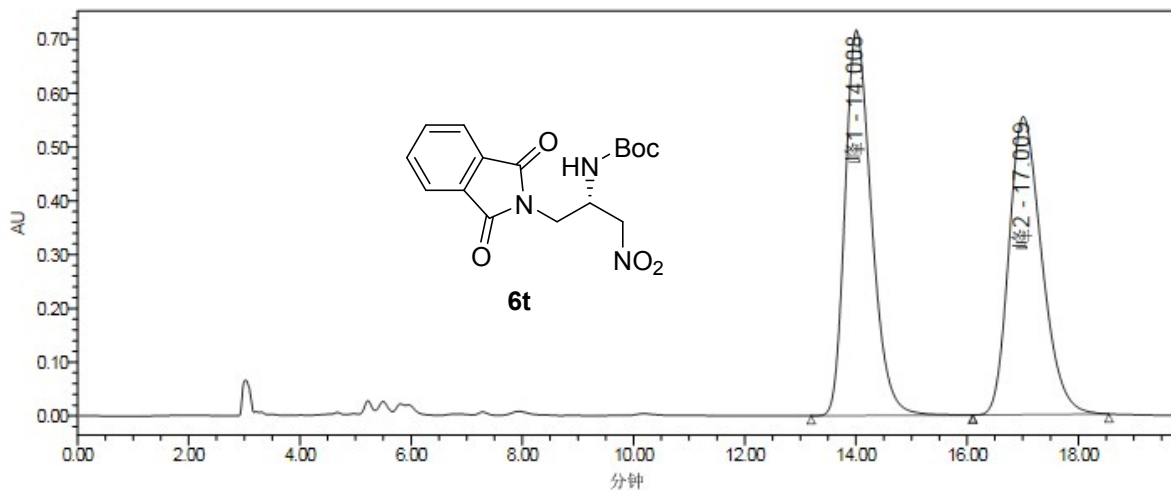

Channel: W2489 ChA; Channel Desc.: W2489 ChA 214nm; Processing Method: 0

|   | Channel Description | Peak Name | RT (min) | Area (磺*sec) | % Area | Height (磺) |
|---|---------------------|-----------|----------|--------------|--------|------------|
| 1 | W2489 ChA 214nm     | 峰1        | 14.008   | 23667548     | 50.99  | 716839     |
| 2 | W2489 ChA 214nm     | 峰2        | 17.009   | 22750453     | 49.01  | 554260     |

#### 4. NMR and HRMS spectra of asymmetric phase-transfer catalysts

| Mass Spectrum SmartFormula Report |                                                |  |                                     |                     |  |
|-----------------------------------|------------------------------------------------|--|-------------------------------------|---------------------|--|
| <b>Analysis Info</b>              |                                                |  | Acquisition Date 2016/6/16 13:53:51 |                     |  |
| Analysis Name                     | E:\0*0EEÿ%ÿµÚ¶pÖÄ\LYX-0615-N_P1-A-9_01_23768.d |  | Operator                            | Zhonglin Wei        |  |
| Method                            | lc-ms3-hr-low.m                                |  | Instrument / Ser#                   | microTOF-Q II 10351 |  |
| Sample Name                       | LYX-0615-N                                     |  | Comment                             |                     |  |

| Acquisition Parameter |          |                       |           |                  |           |
|-----------------------|----------|-----------------------|-----------|------------------|-----------|
| Source Type           | ESI      | Ion Polarity          | Positive  | Set Nebulizer    | 0.4 Bar   |
| Focus                 | Active   | Set Capillary         | 4500 V    | Set Dry Heater   | 180 °C    |
| Scan Begin            | 50 m/z   | Set End Plate Offset  | -500 V    | Set Dry Gas      | 4.0 l/min |
| Scan End              | 3000 m/z | Set Collision Cell RF | 150.0 Vpp | Set Divert Valve | Waste     |

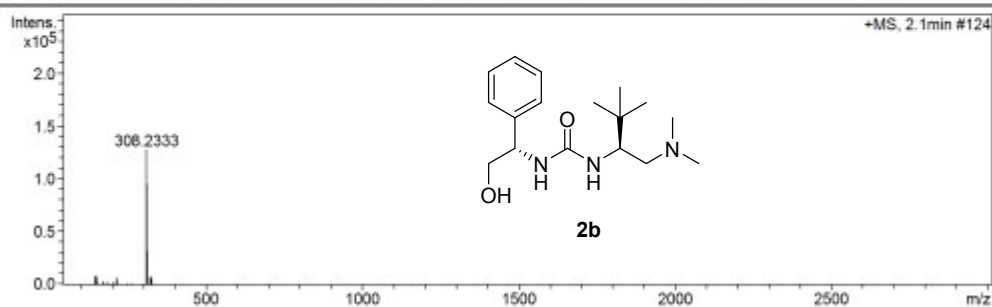

| Meas. m/z | Formula           | m/z      | err [ppm] | Mean err [ppm] | mSigma | rdb | e Conf | N-Rule |
|-----------|-------------------|----------|-----------|----------------|--------|-----|--------|--------|
| 308.2333  | C 17 H 30 N 3 O 2 | 308.2333 | -0.2      | 0.3            | 29.44  | 4.5 | even   | ok     |

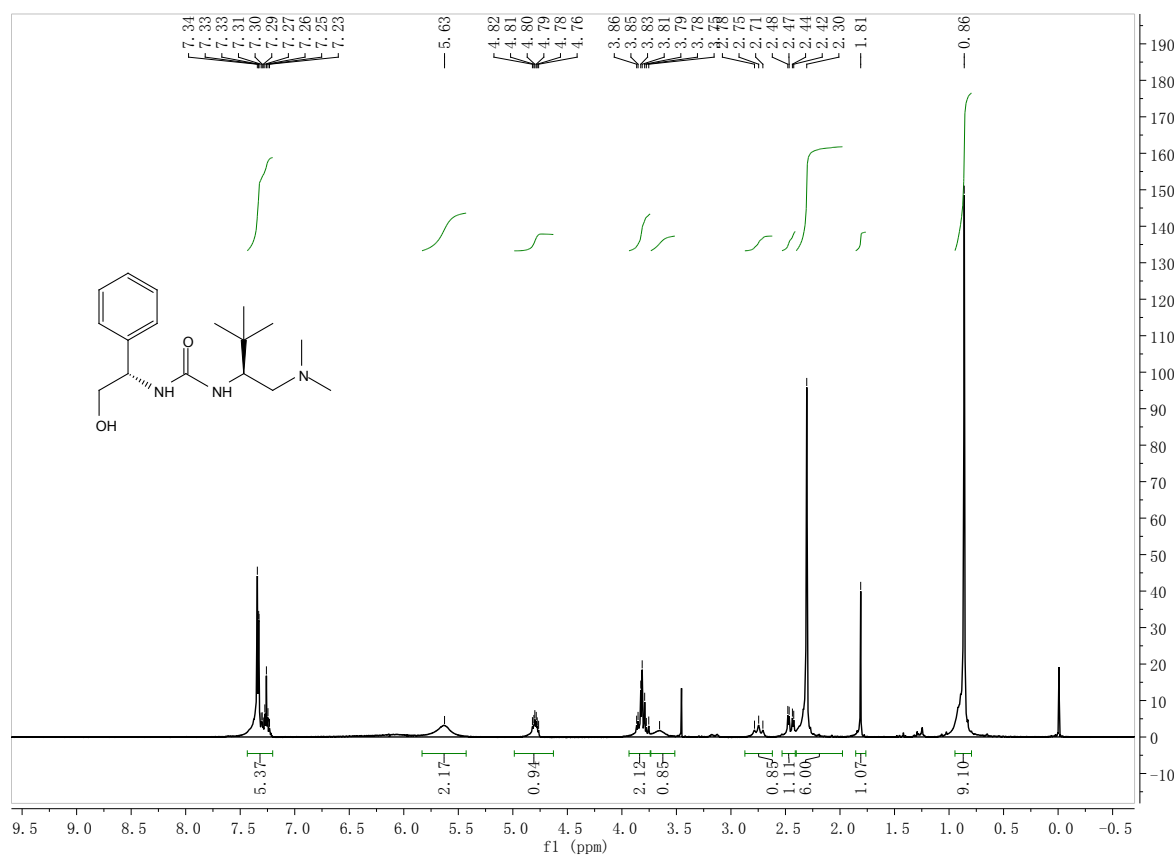

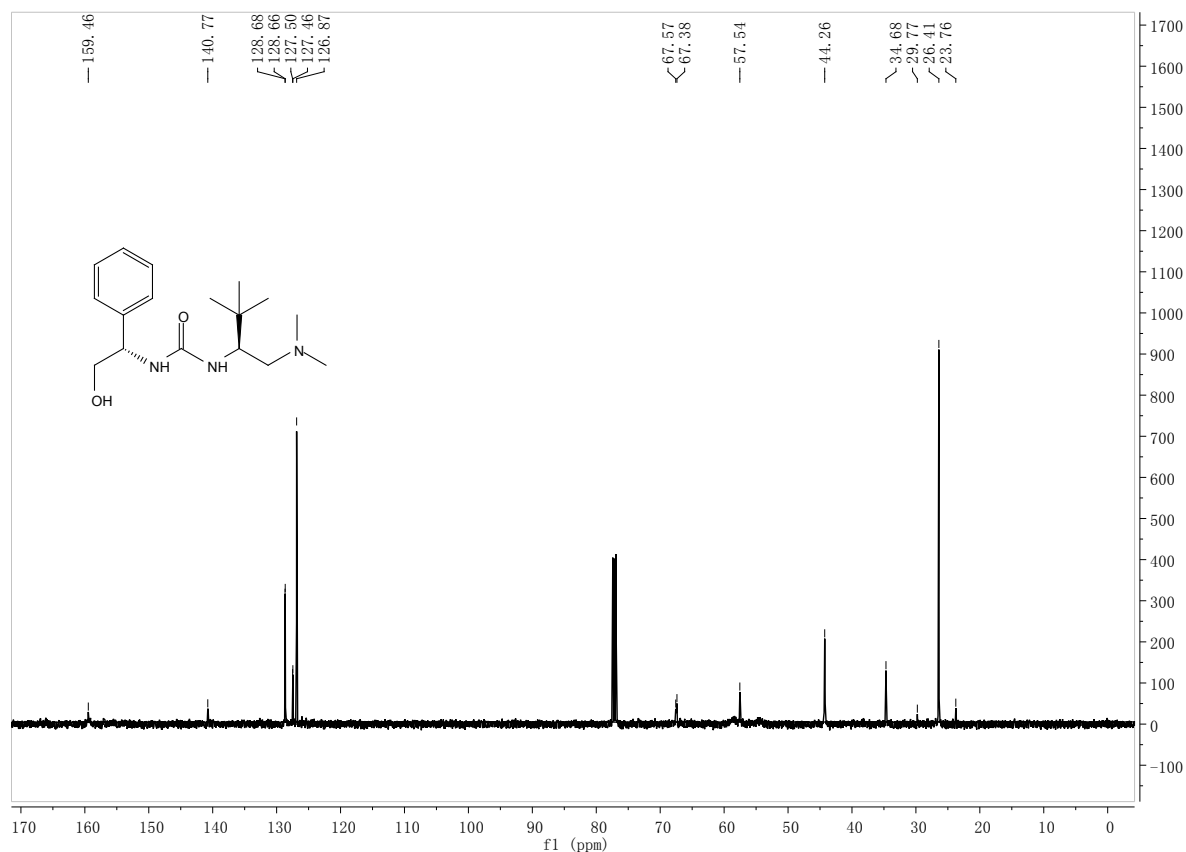

## Mass Spectrum SmartFormula Report

### Analysis Info

Analysis Name E:\00000000\4\µ\p\LYX-0614-DBG\_P1-A-8\_01\_23767.d  
 Method lc-ms3-hr-low.m  
 Sample Name LYX-0614-DBG  
 Comment

Acquisition Date 2016/6/16 13:46:50

Operator Zhonglin Wei

Instrument / Ser# micrOTOF-Q II 10351

### Acquisition Parameter

|             |          |                       |           |                  |           |
|-------------|----------|-----------------------|-----------|------------------|-----------|
| Source Type | ESI      | Ion Polarity          | Positive  | Set Nebulizer    | 0.4 Bar   |
| Focus       | Active   | Set Capillary         | 4500 V    | Set Dry Heater   | 180 °C    |
| Scan Begin  | 50 m/z   | Set End Plate Offset  | -500 V    | Set Dry Gas      | 4.0 l/min |
| Scan End    | 3000 m/z | Set Collision Cell RF | 150.0 Vpp | Set Divert Valve | Waste     |

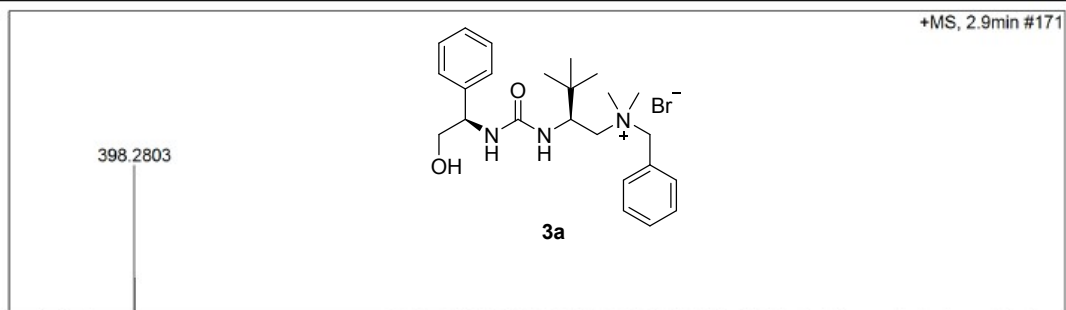

| Meas. m/z | Formula                                                       | m/z      | err [ppm] | Mean err [ppm] | mSigma | rdb | e <sup>-</sup> Conf | N-Rule |
|-----------|---------------------------------------------------------------|----------|-----------|----------------|--------|-----|---------------------|--------|
| 398.2803  | C <sub>24</sub> H <sub>36</sub> N <sub>3</sub> O <sub>2</sub> | 398.2802 | -0.3      | 1.8            | 5.08   | 8.5 | even                | ok     |

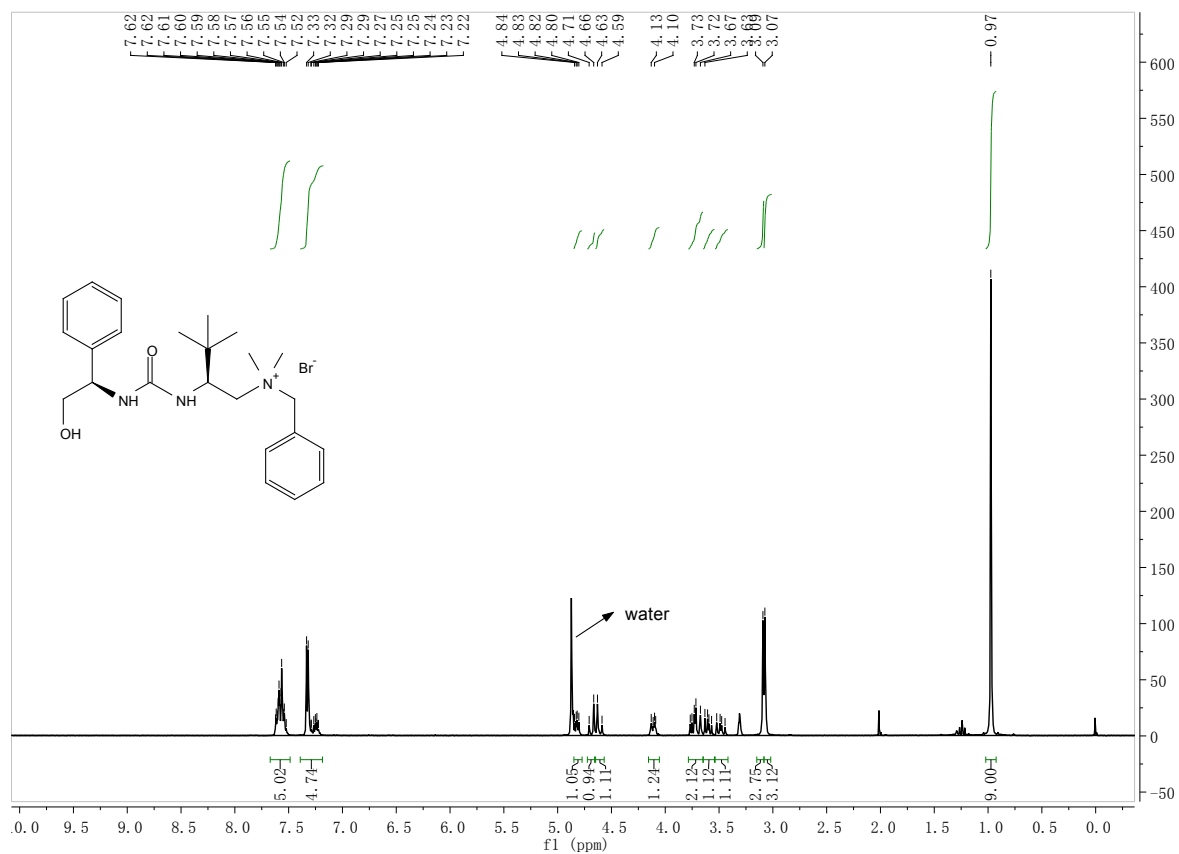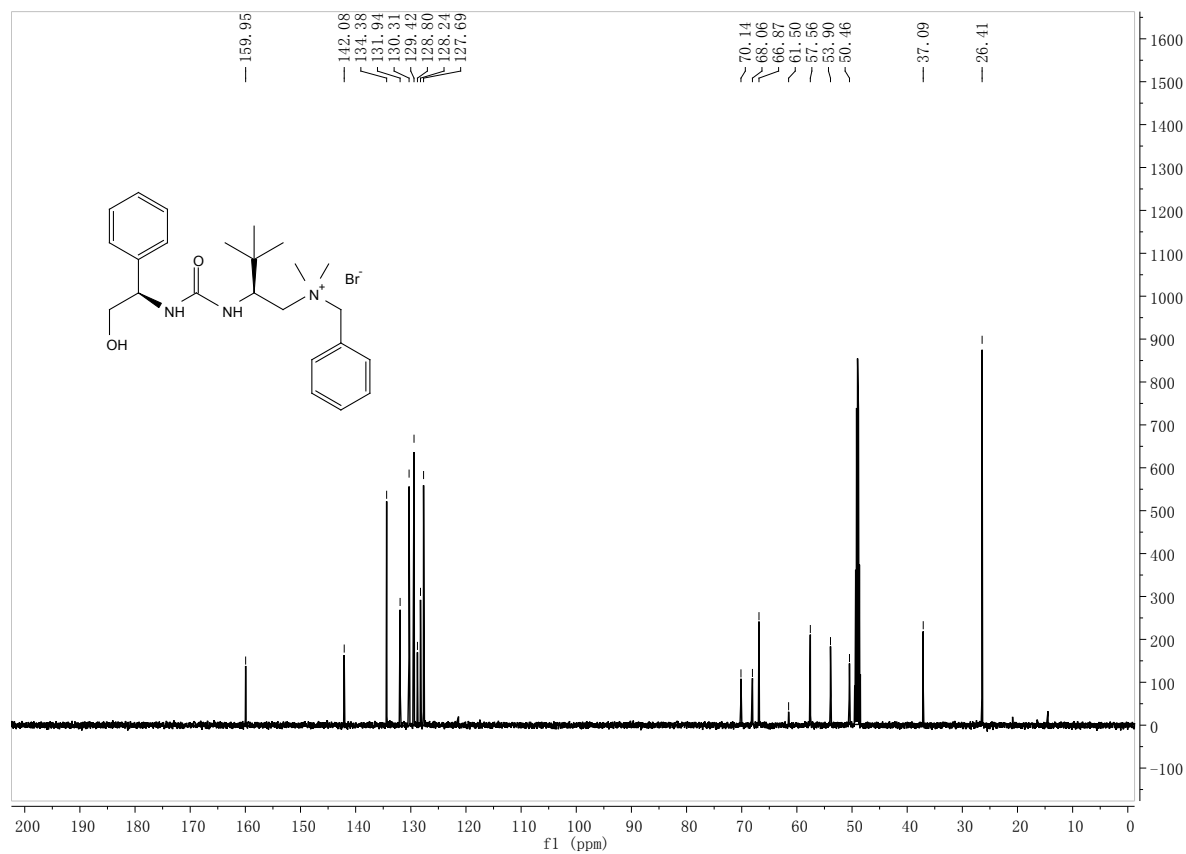

# Mass Spectrum SmartFormula Report

## Analysis Info

Analysis Name: E:\0-000000000000\LYX-0614-DBG\_P1-A-8\_01\_23767.d  
 Method: lc-ms3-hr-low.m  
 Sample Name: LYX-0614-DBG  
 Comment:

Acquisition Date: 2016/6/16 13:46:50  
 Operator: Zhonglin Wei  
 Instrument / Ser#: microTOF-Q II 10351

## Acquisition Parameter

| Source Type | ESI      | Ion Polarity          | Positive  | Set Nebulizer    | 0.4 Bar   |
|-------------|----------|-----------------------|-----------|------------------|-----------|
| Focus       | Active   | Set Capillary         | 4500 V    | Set Dry Heater   | 180 °C    |
| Scan Begin  | 50 m/z   | Set End Plate Offset  | -500 V    | Set Dry Gas      | 4.0 l/min |
| Scan End    | 3000 m/z | Set Collision Cell RF | 150.0 Vpp | Set Divert Valve | Waste     |

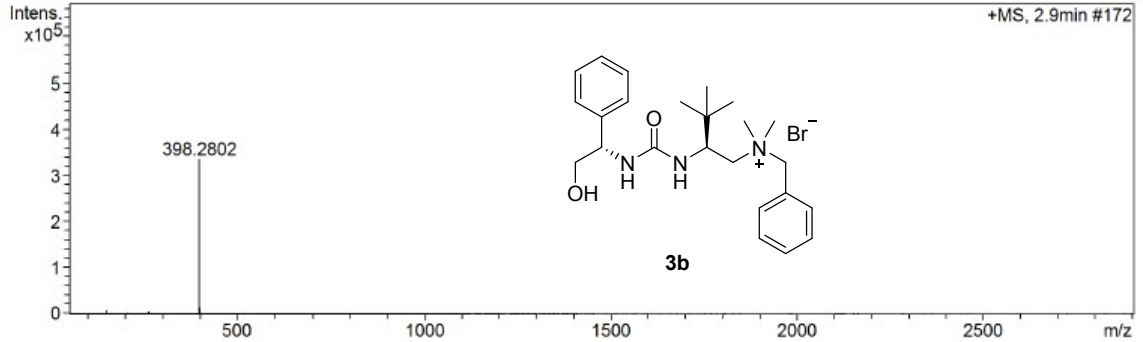

| Meas. m/z | Formula                                                       | m/z      | err [ppm] | Mean err [ppm] | mSigma | rdb | e <sup>-</sup> Conf | N-Rule |
|-----------|---------------------------------------------------------------|----------|-----------|----------------|--------|-----|---------------------|--------|
| 398.2802  | C <sub>24</sub> H <sub>36</sub> N <sub>3</sub> O <sub>2</sub> | 398.2802 | -0.0      | 2.0            | 4.64   | 8.5 | even                | ok     |

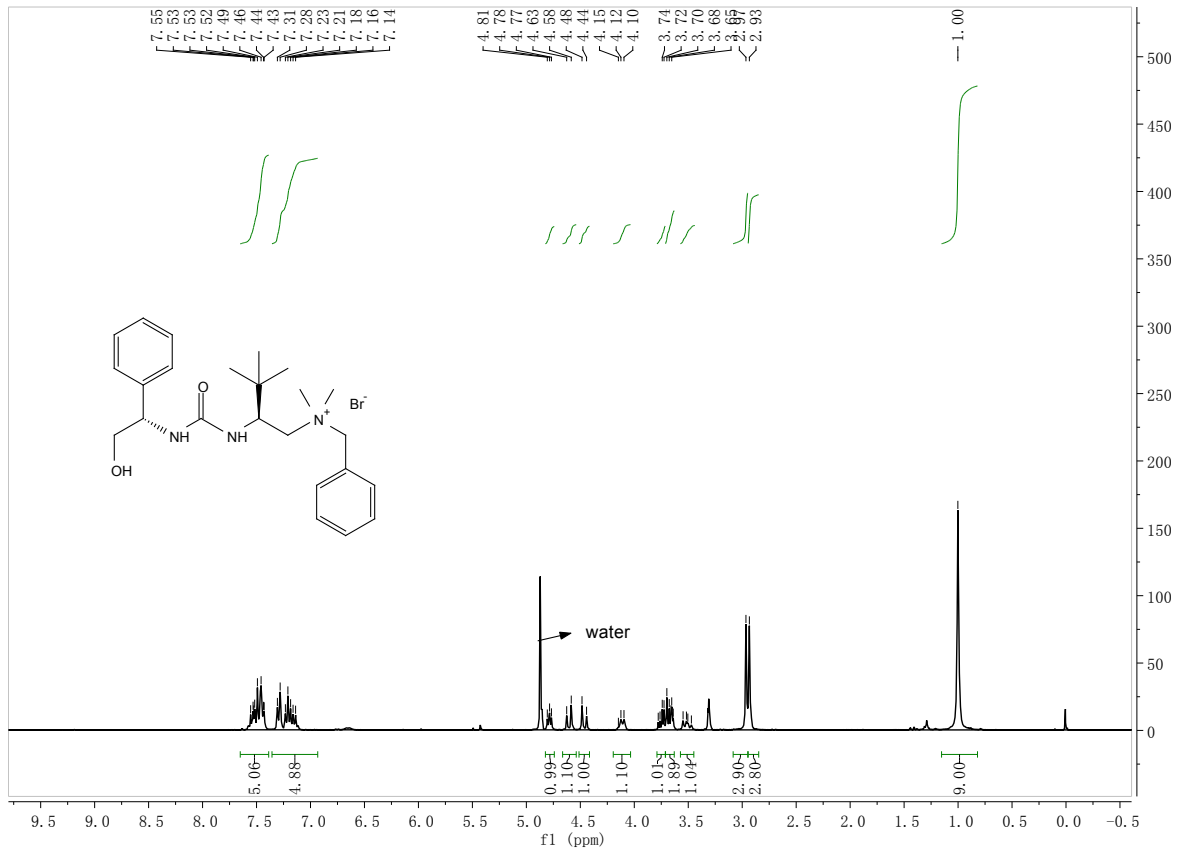

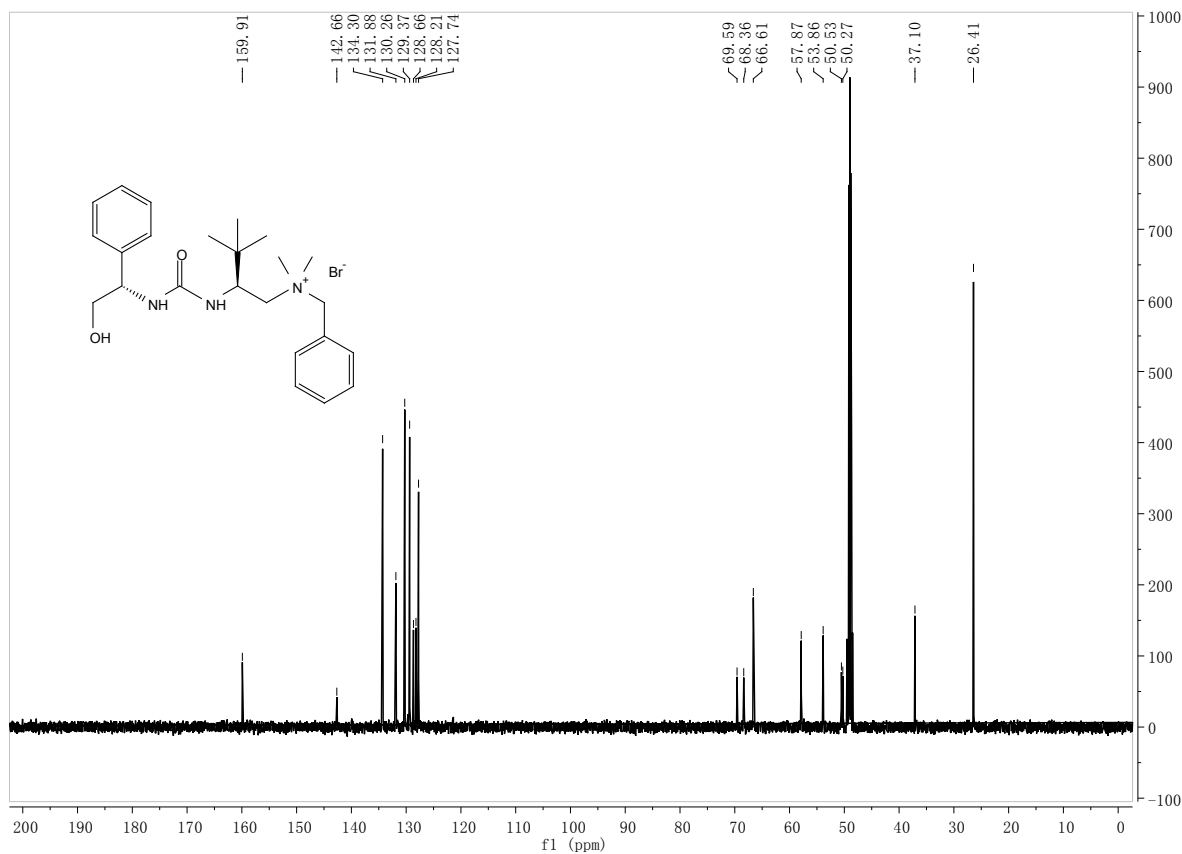

## Mass Spectrum SmartFormula Report

### Analysis Info

Analysis Name E:\0°ÖÉËÿ%4ÿμÚÿpōÁ\LYX0823-BBN\_P1-F-7\_01\_24154.d  
 Method lc-ms-hr-low.m  
 Sample Name LYX0823-BBN  
 Comment

Acquisition Date 2016/8/25 19:19:56  
 Operator Zhonglin Wei  
 Instrument / Ser# micrOTOF-Q II 10351

### Acquisition Parameter

|             |          |                       |           |                  |           |
|-------------|----------|-----------------------|-----------|------------------|-----------|
| Source Type | ESI      | Ion Polarity          | Positive  | Set Nebulizer    | 0.4 Bar   |
| Focus       | Active   | Set Capillary         | 4500 V    | Set Dry Heater   | 180 °C    |
| Scan Begin  | 50 m/z   | Set End Plate Offset  | -500 V    | Set Dry Gas      | 4.0 l/min |
| Scan End    | 3000 m/z | Set Collision Cell RF | 150.0 Vpp | Set Divert Valve | Waste     |

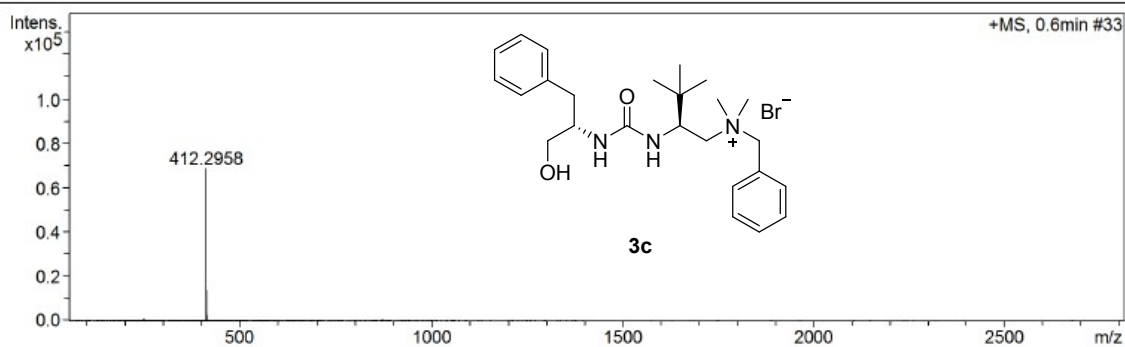

| Meas. m/z | Formula                                                       | m/z      | err [ppm] | Mean err [ppm] | mSigma | rdb | e <sub>1</sub> Conf | N-Rule |
|-----------|---------------------------------------------------------------|----------|-----------|----------------|--------|-----|---------------------|--------|
| 412.2958  | C <sub>25</sub> H <sub>38</sub> N <sub>3</sub> O <sub>2</sub> | 412.2959 | 0.2       | 0.5            | 51.53  | 8.5 | even                | ok     |



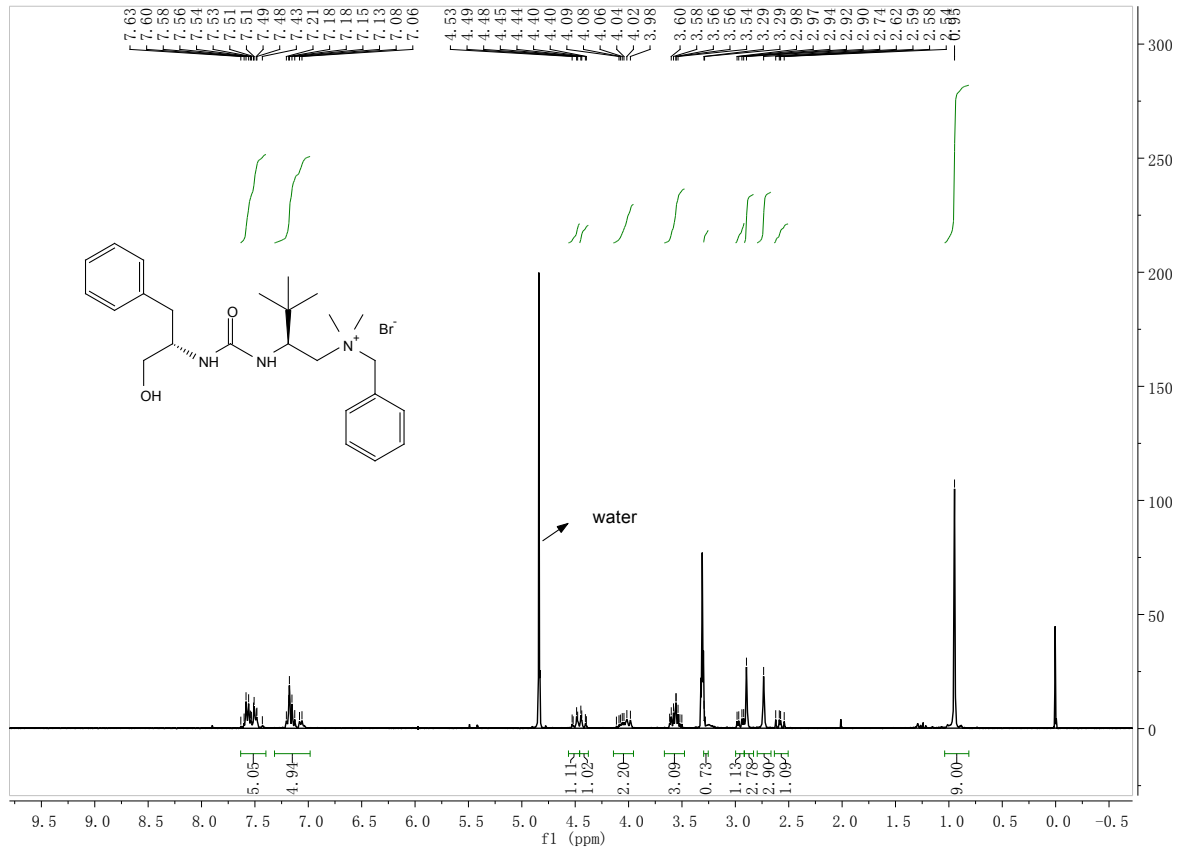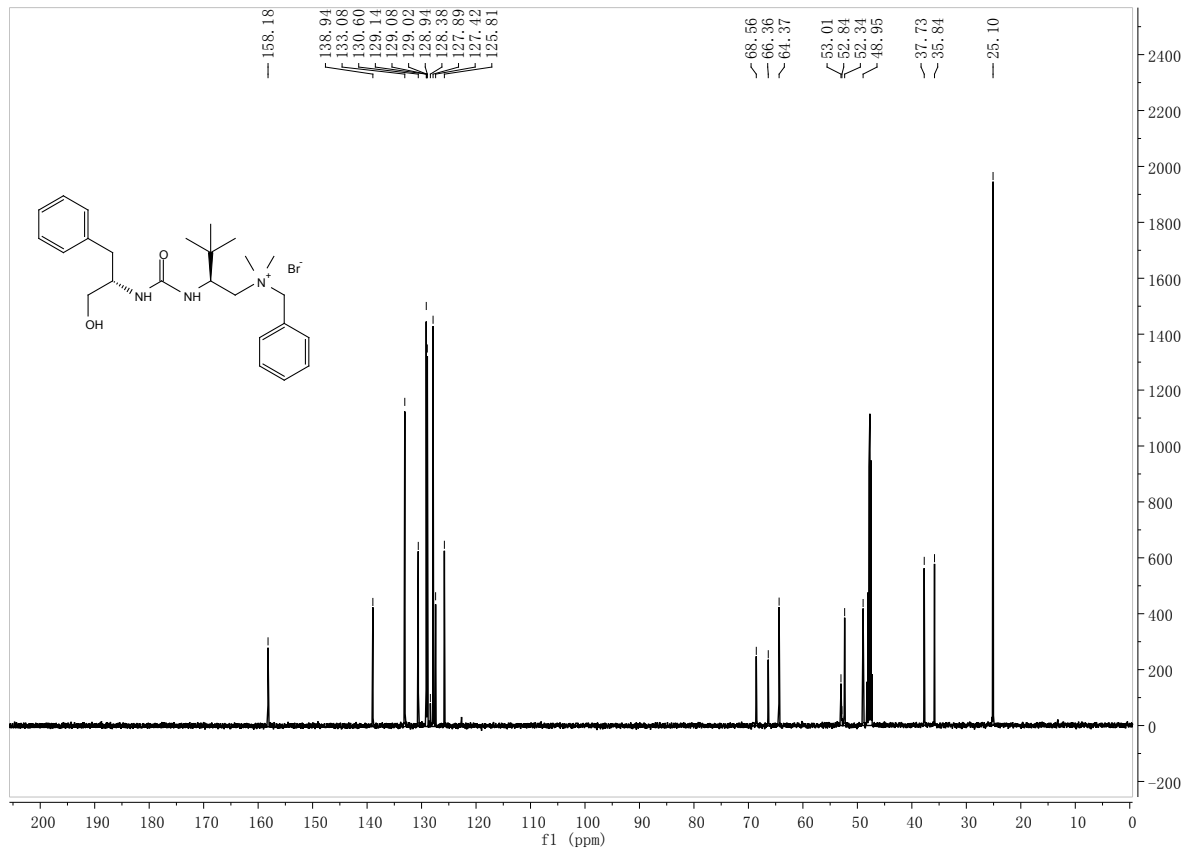

## Mass Spectrum SmartFormula Report

### Analysis Info

Analysis Name: E:\00000000\p000\LYX-0615-2PH\_P1-B-2\_01\_23770.d  
 Method: lc-ms3-hr-low.m  
 Sample Name: LYX-0615-2PH  
 Comment:

Acquisition Date: 2016/6/16 14:07:54  
 Operator: Zhonglin Wei  
 Instrument / Ser#: micrOTOF-Q II 10351

### Acquisition Parameter

|             |          |                       |           |                  |           |
|-------------|----------|-----------------------|-----------|------------------|-----------|
| Source Type | ESI      | Ion Polarity          | Positive  | Set Nebulizer    | 0.4 Bar   |
| Focus       | Active   | Set Capillary         | 4500 V    | Set Dry Heater   | 180 °C    |
| Scan Begin  | 50 m/z   | Set End Plate Offset  | -500 V    | Set Dry Gas      | 4.0 l/min |
| Scan End    | 3000 m/z | Set Collision Cell RF | 150.0 Vpp | Set Divert Valve | Waste     |

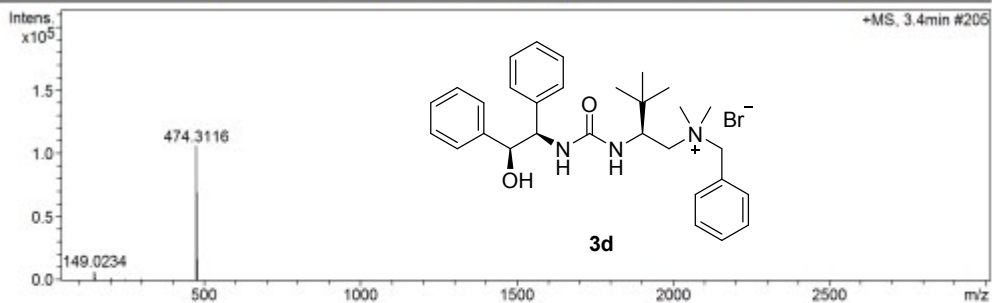

| Meas. m/z | Formula                                                       | m/z      | err [ppm] | Mean err [ppm] | mSigma | rdb  | e N Conf | N-Rule |
|-----------|---------------------------------------------------------------|----------|-----------|----------------|--------|------|----------|--------|
| 474.3116  | C <sub>30</sub> H <sub>40</sub> N <sub>3</sub> O <sub>2</sub> | 474.3115 | -0.2      | 0.4            | 24.30  | 12.5 | even     | ok     |

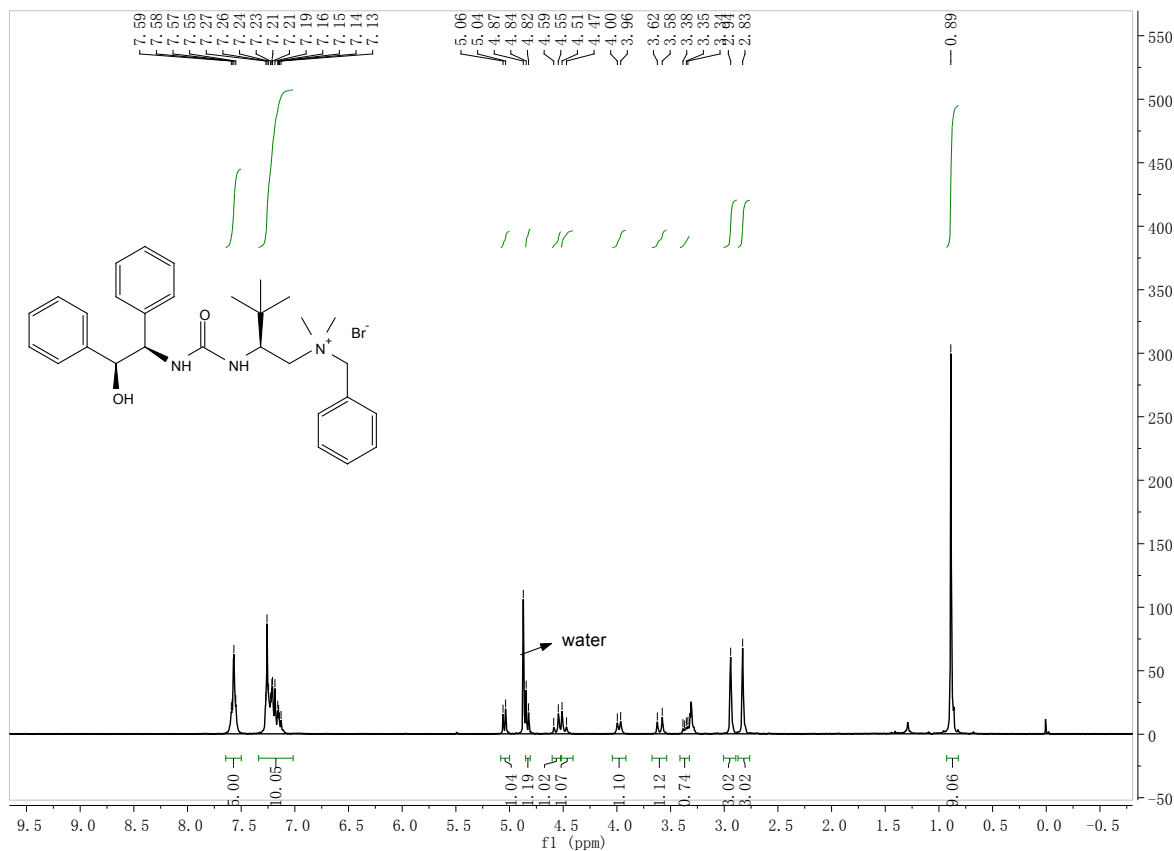

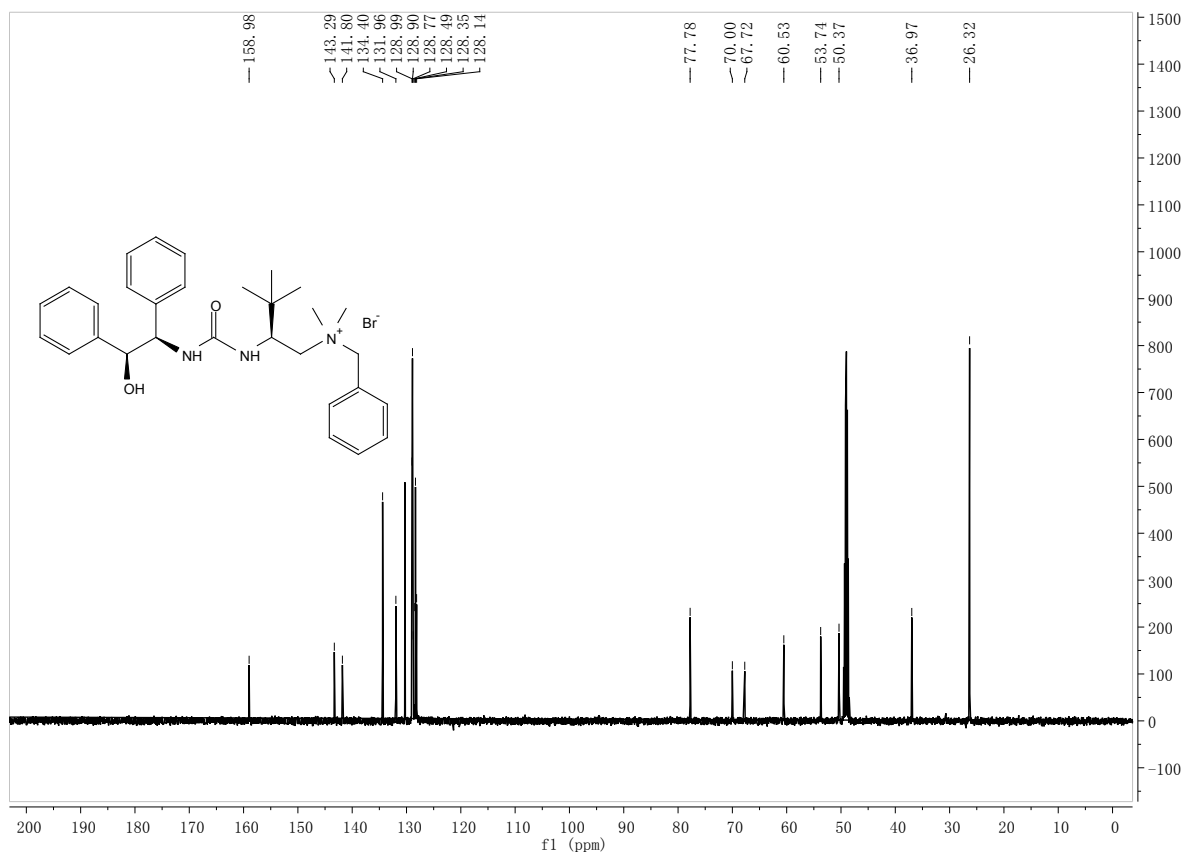

## Mass Spectrum SmartFormula Report

### Analysis Info

Analysis Name E:\000000\000000\LYX-0615-2SHU\_P1-A-7\_01\_23766.d  
 Method lc-ms3-hr-low.m  
 Sample Name LYX-0615-2SHU  
 Comment

Acquisition Date 2016/6/16 13:39:49  
 Operator Zhonglin Wei  
 Instrument / Ser# micrOTOF-Q II 10351

### Acquisition Parameter

|             |          |                       |           |                  |           |
|-------------|----------|-----------------------|-----------|------------------|-----------|
| Source Type | ESI      | Ion Polarity          | Positive  | Set Nebulizer    | 0.4 Bar   |
| Focus       | Active   | Set Capillary         | 4500 V    | Set Dry Heater   | 180 °C    |
| Scan Begin  | 50 m/z   | Set End Plate Offset  | -500 V    | Set Dry Gas      | 4.0 l/min |
| Scan End    | 3000 m/z | Set Collision Cell RF | 150.0 Vpp | Set Divert Valve | Waste     |

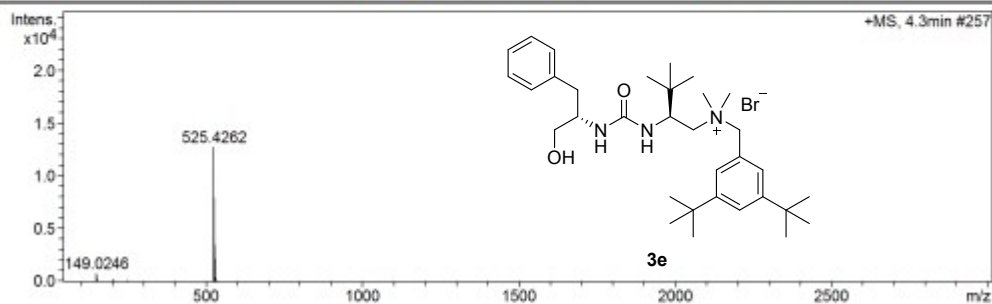

| Meas. m/z | Formula           | m/z      | err [ppm] | Mean err [ppm] | mSigma | rdb | e Conf | N-Rule |
|-----------|-------------------|----------|-----------|----------------|--------|-----|--------|--------|
| 524.4210  | C 33 H 54 N 3 O 2 | 524.4211 | 0.0       | -2.2           | 330.42 | 8.5 | even   | ok     |

**Analysis Info**

Analysis Name E:\00000000\000000\LYX-0615-2SHU\_P1-A-7\_01\_23766.d  
 Method lc-ms3-hr-low.m  
 Sample Name LYX-0615-2SHU  
 Comment

Acquisition Date 2016/6/16 13:39:49  
 Operator Zhonglin Wei  
 Instrument / Ser# microTOF-Q II 10351

**Acquisition Parameter**

|             |          |                       |           |                  |           |
|-------------|----------|-----------------------|-----------|------------------|-----------|
| Source Type | ESI      | Ion Polarity          | Positive  | Set Nebulizer    | 0.4 Bar   |
| Focus       | Active   | Set Capillary         | 4500 V    | Set Dry Heater   | 180 °C    |
| Scan Begin  | 50 m/z   | Set End Plate Offset  | -500 V    | Set Dry Gas      | 4.0 l/min |
| Scan End    | 3000 m/z | Set Collision Cell RF | 150.0 Vpp | Set Divert Valve | Waste     |

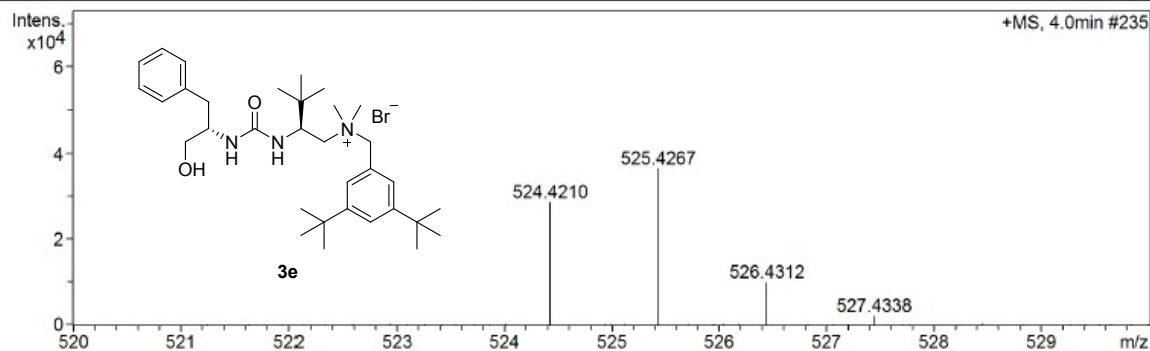

| Meas. m/z | Formula                                                       | m/z      | err [ppm] | Mean err [ppm] | mSigma | rdb | e <sub>1</sub> Conf | N-Rule |
|-----------|---------------------------------------------------------------|----------|-----------|----------------|--------|-----|---------------------|--------|
| 524.4210  | C <sub>33</sub> H <sub>54</sub> N <sub>3</sub> O <sub>2</sub> | 524.4211 | 0.0       | -3.1           | 346.07 | 8.5 | even                | ok     |

**Mass Spectrum SmartFormula Report**

7CH11 D1.A.

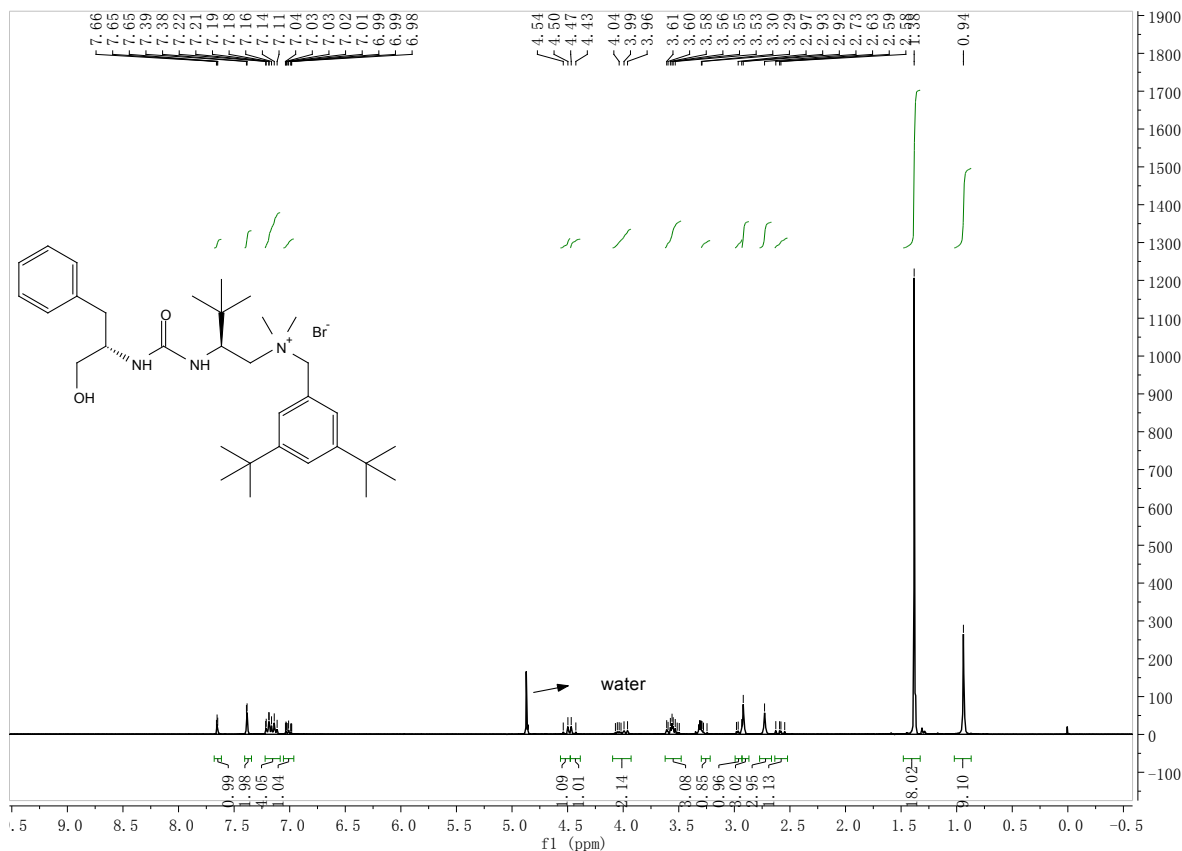

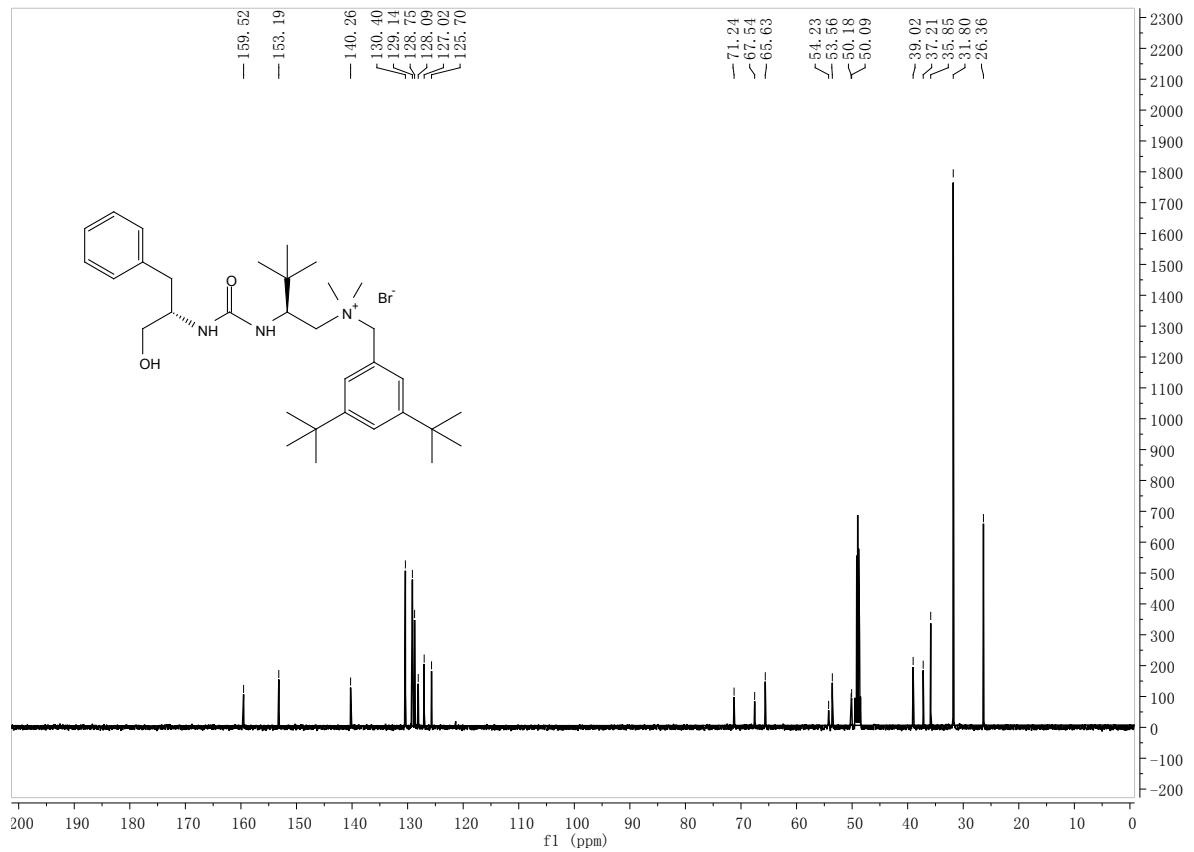

## Mass Spectrum SmartFormula Report

### Analysis Info

Analysis Name: E:\0\*00E0y\4Y2016\LYX-0615-BPBR\_P1-B-1\_01\_23769.d  
 Method: lc-ms3-hr-low.m  
 Sample Name: LYX-0615-BPBR  
 Comment:

Acquisition Date: 2016/6/16 14:00:52

Operator: Zhonglin Wei  
 Instrument / Ser#: microTOF-Q II 10351

### Acquisition Parameter

|             |          |                       |           |                  |           |
|-------------|----------|-----------------------|-----------|------------------|-----------|
| Source Type | ESI      | Ion Polarity          | Positive  | Set Nebulizer    | 0.4 Bar   |
| Focus       | Active   | Set Capillary         | 4500 V    | Set Dry Heater   | 180 °C    |
| Scan Begin  | 50 m/z   | Set End Plate Offset  | -500 V    | Set Dry Gas      | 4.0 l/min |
| Scan End    | 3000 m/z | Set Collision Cell RF | 150.0 Vpp | Set Divert Valve | Waste     |

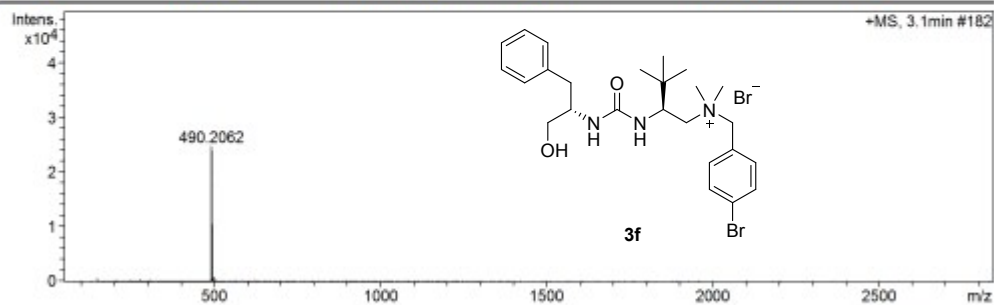

| Meas. m/z | Formula                                                         | m/z      | err [ppm] | Mean err [ppm] | mSigma | rdb | e Conf | N-Rule |
|-----------|-----------------------------------------------------------------|----------|-----------|----------------|--------|-----|--------|--------|
| 490.2062  | C <sub>25</sub> H <sub>37</sub> BrN <sub>3</sub> O <sub>2</sub> | 490.2064 | 0.2       | -2.2           | 97.48  | 8.5 | even   | ok     |

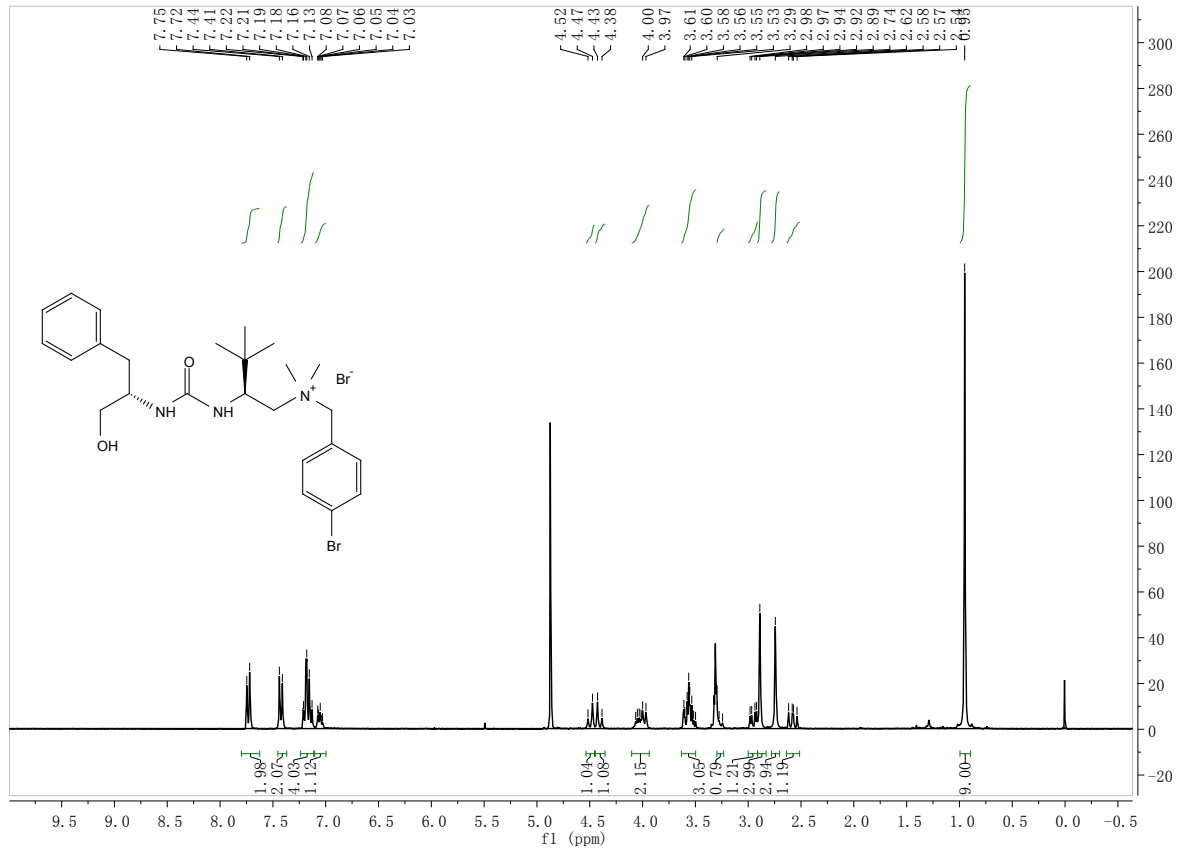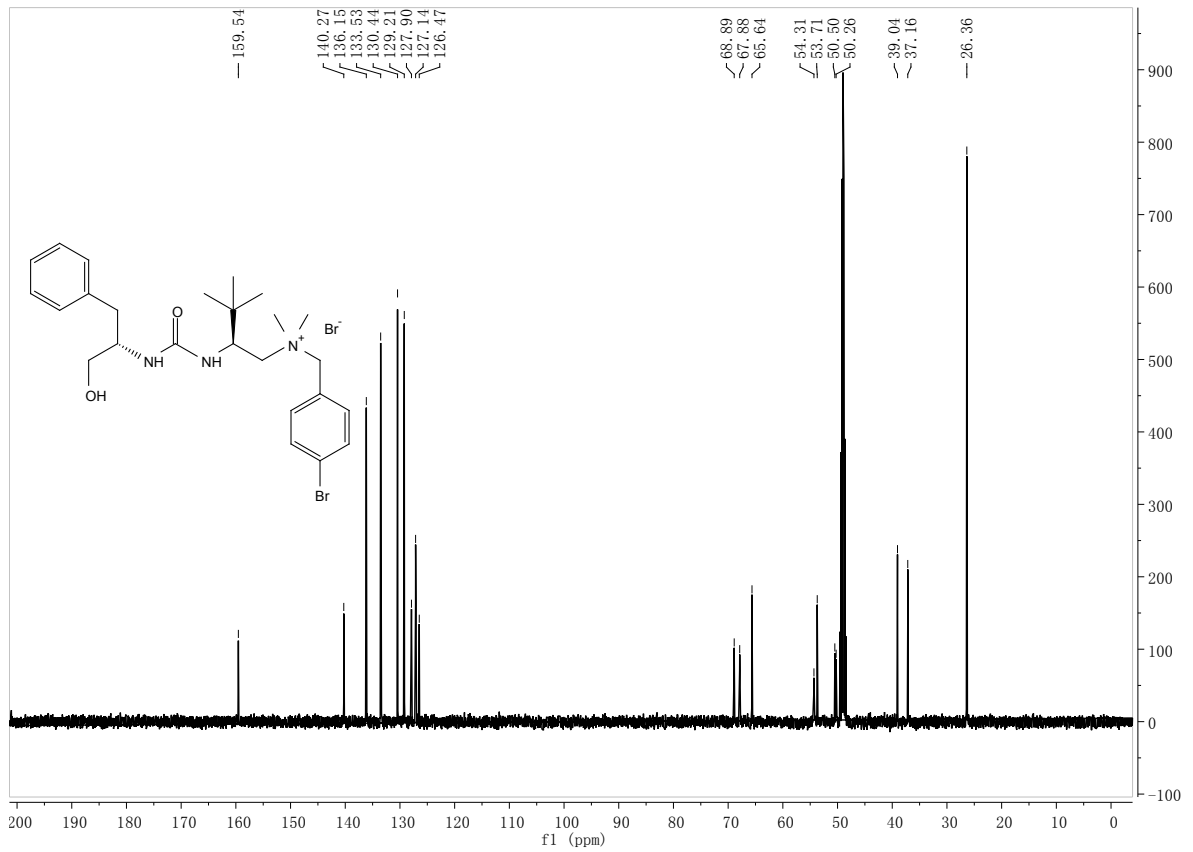

# Mass Spectrum SmartFormula Report

## Analysis Info

Analysis Name: E:\00EEÿ%4ÿµÙpÖÄ\lyx-0321-Me\_P1-B-1\_01\_1616.d  
Method: lc-ms4-hr-low.m  
Sample Name: lyx-0321-Me  
Comment:

Acquisition Date: 2017/3/31 13:37:14

Operator: zlwei  
Instrument / Ser#: microTOF-Q II 10351

## Acquisition Parameter

|             |          |                       |           |                  |           |
|-------------|----------|-----------------------|-----------|------------------|-----------|
| Source Type | ESI      | Ion Polarity          | Positive  | Set Nebulizer    | 0.4 Bar   |
| Focus       | Active   | Set Capillary         | 4500 V    | Set Dry Heater   | 180 °C    |
| Scan Begin  | 50 m/z   | Set End Plate Offset  | -500 V    | Set Dry Gas      | 4.0 l/min |
| Scan End    | 3000 m/z | Set Collision Cell RF | 150.0 Vpp | Set Divert Valve | Waste     |

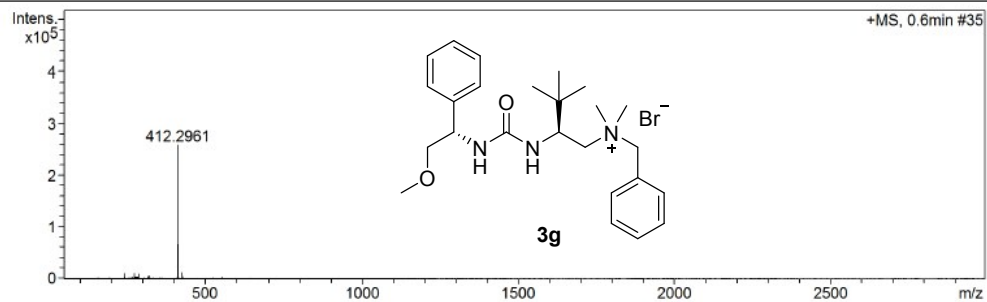

| Meas. m/z | Formula                                                       | m/z      | err [ppm] | Mean err [ppm] | mSigma | rdb | ej   | Conf | N-Rule |
|-----------|---------------------------------------------------------------|----------|-----------|----------------|--------|-----|------|------|--------|
| 412.2961  | C <sub>25</sub> H <sub>38</sub> N <sub>3</sub> O <sub>2</sub> | 412.2959 | -0.7      | -0.5           | 19.04  | 8.5 | even |      | ok     |

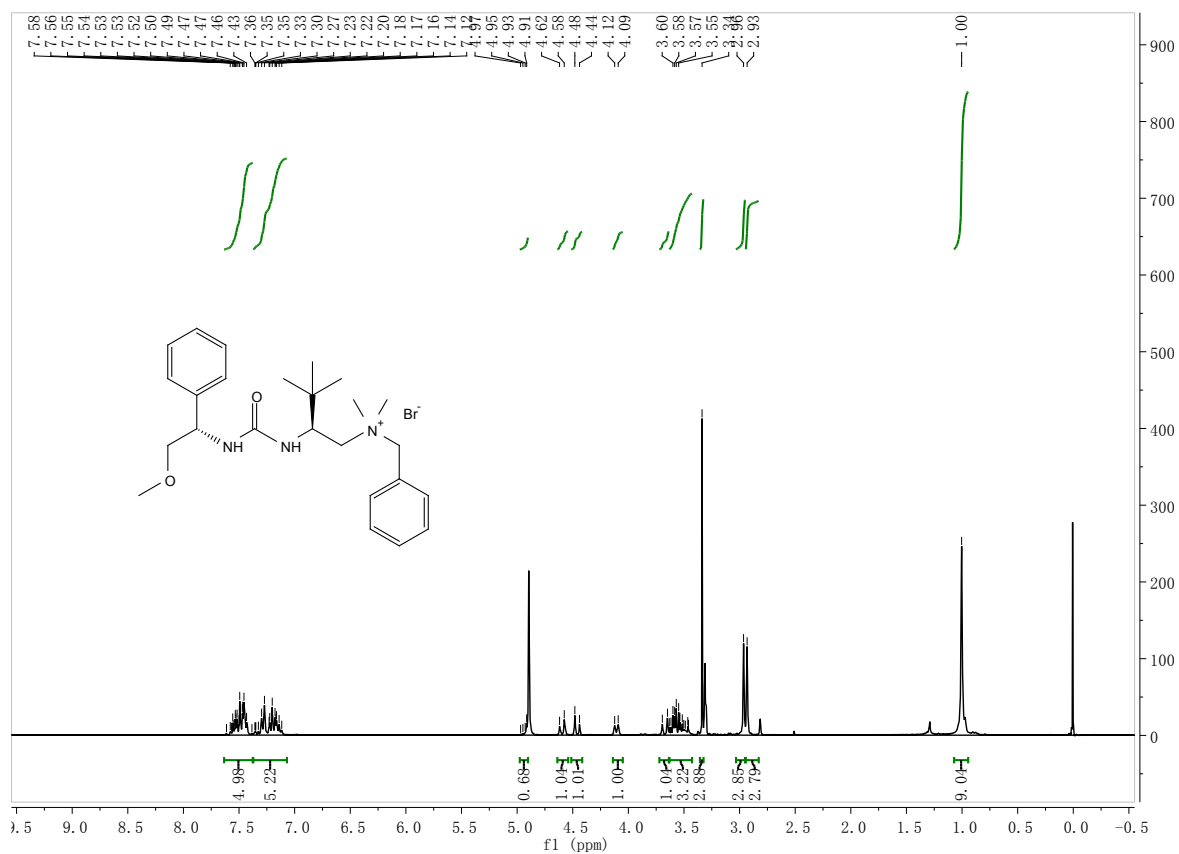

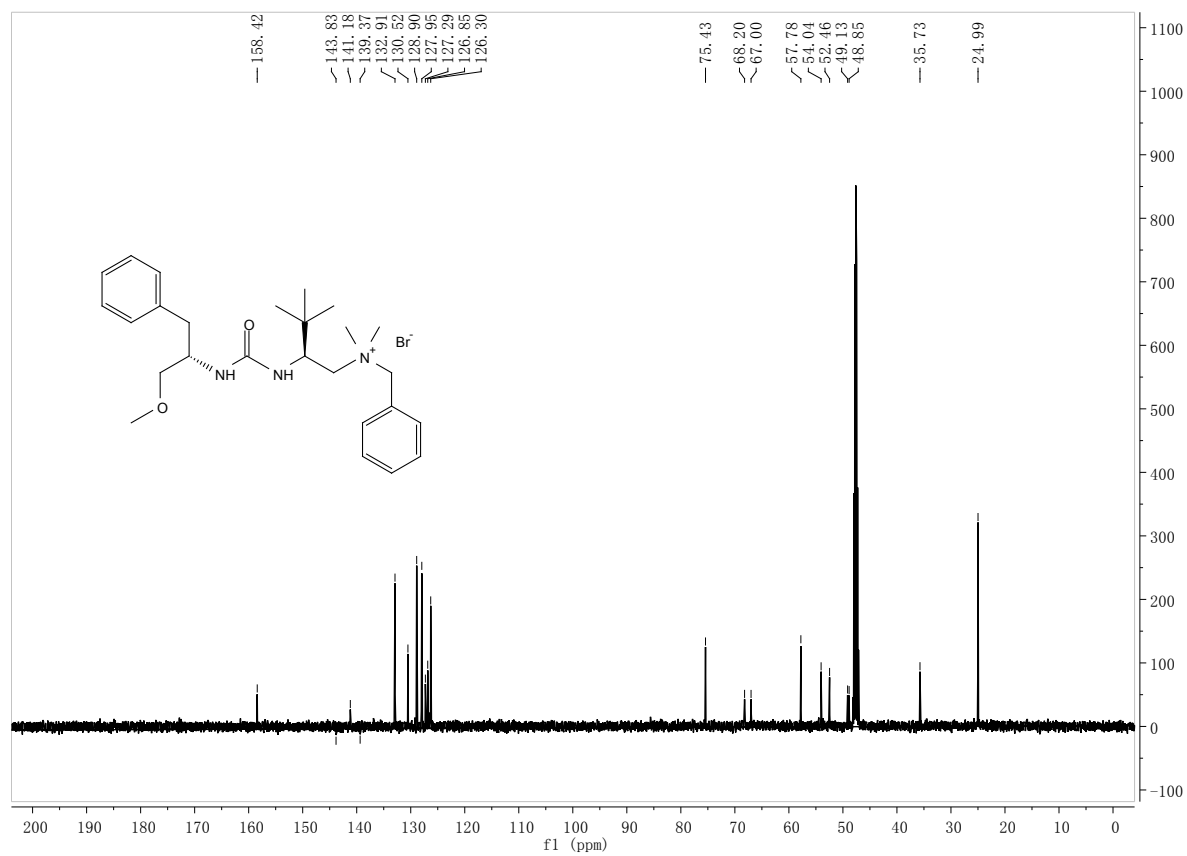



## 5. NMR spectra of addition products

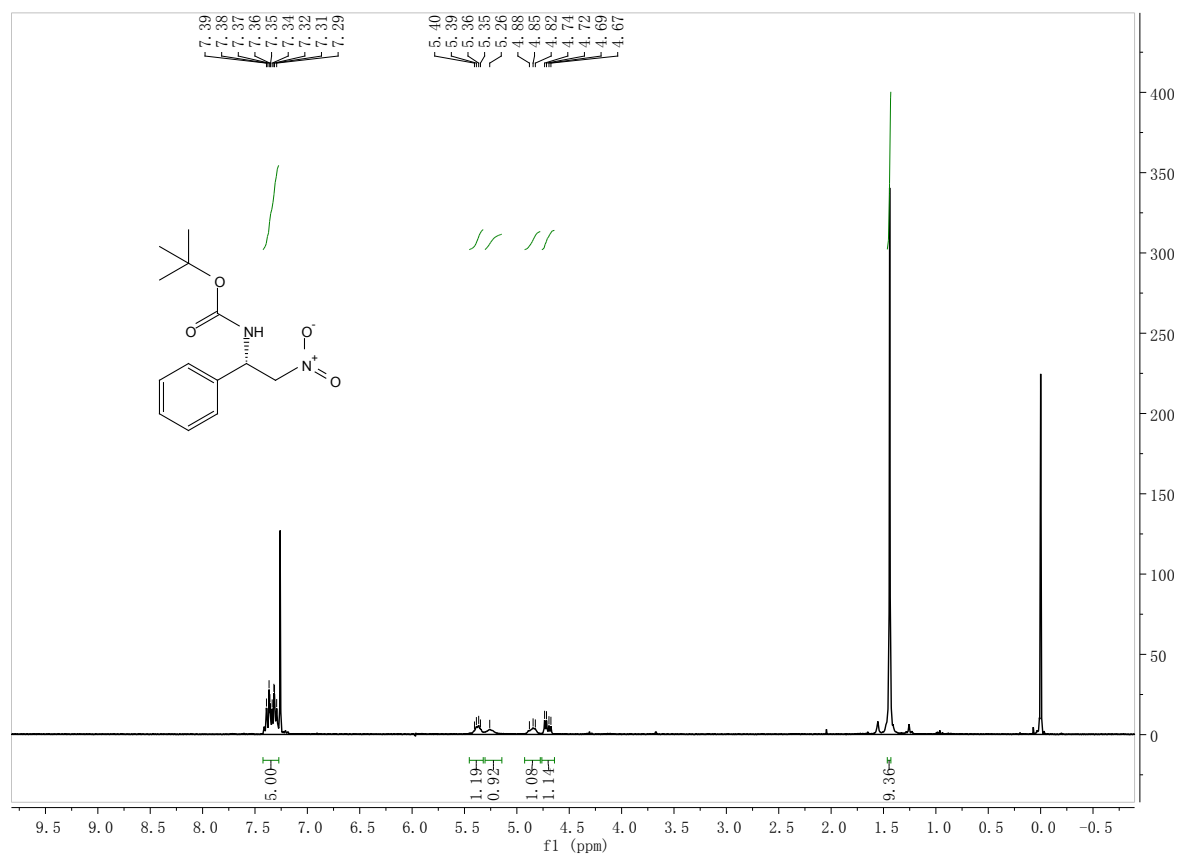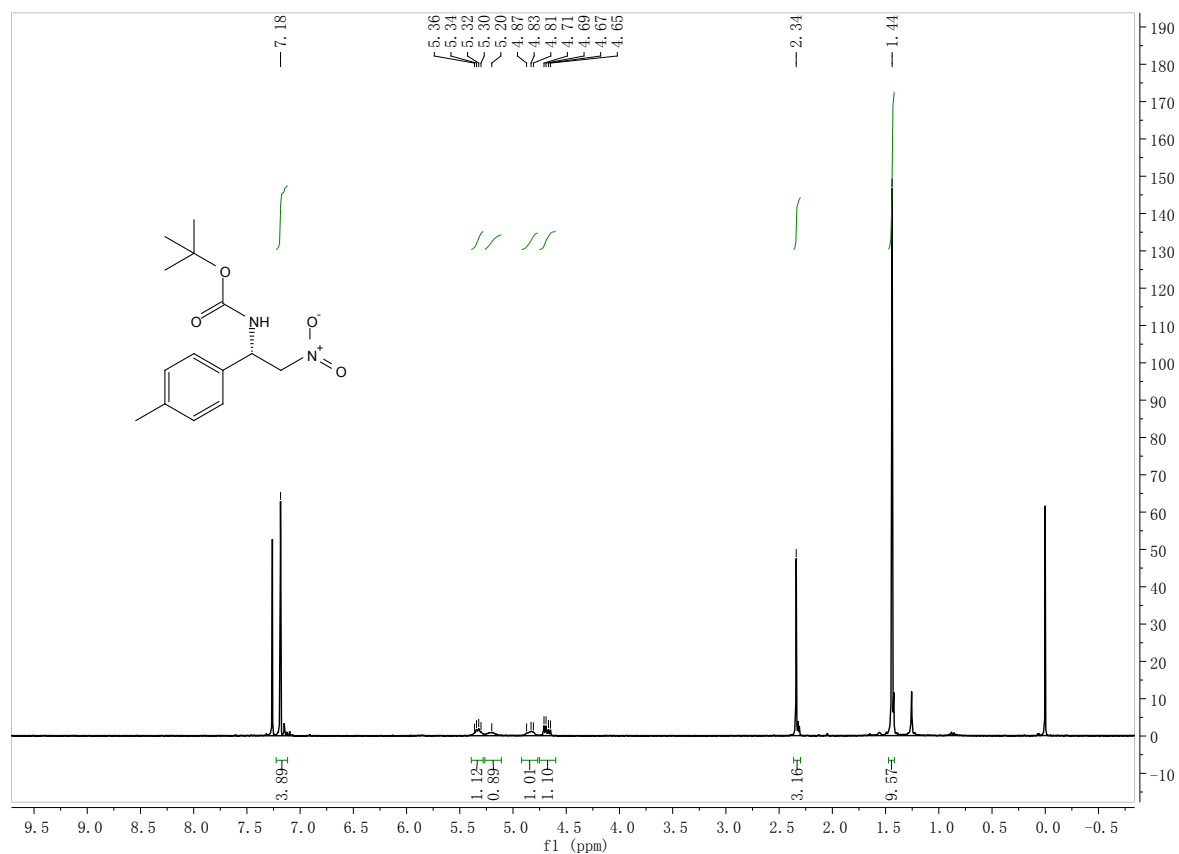

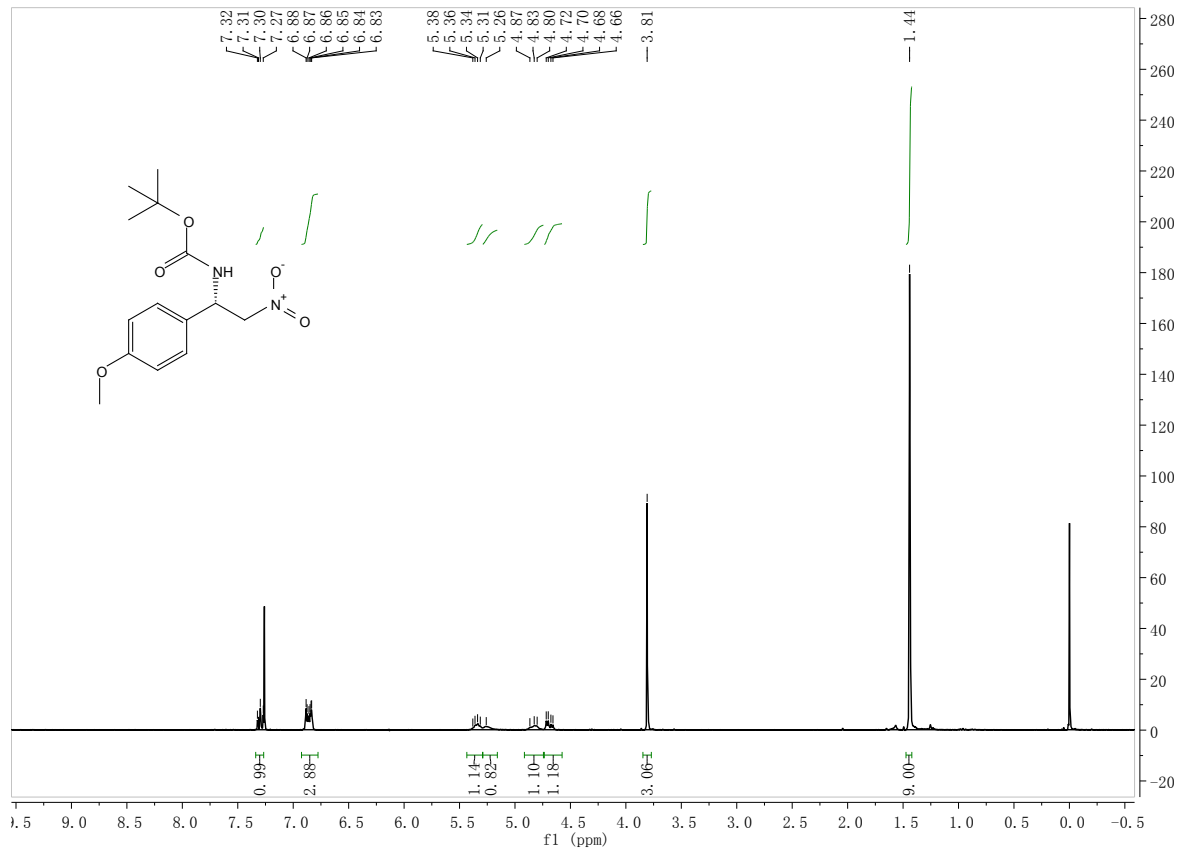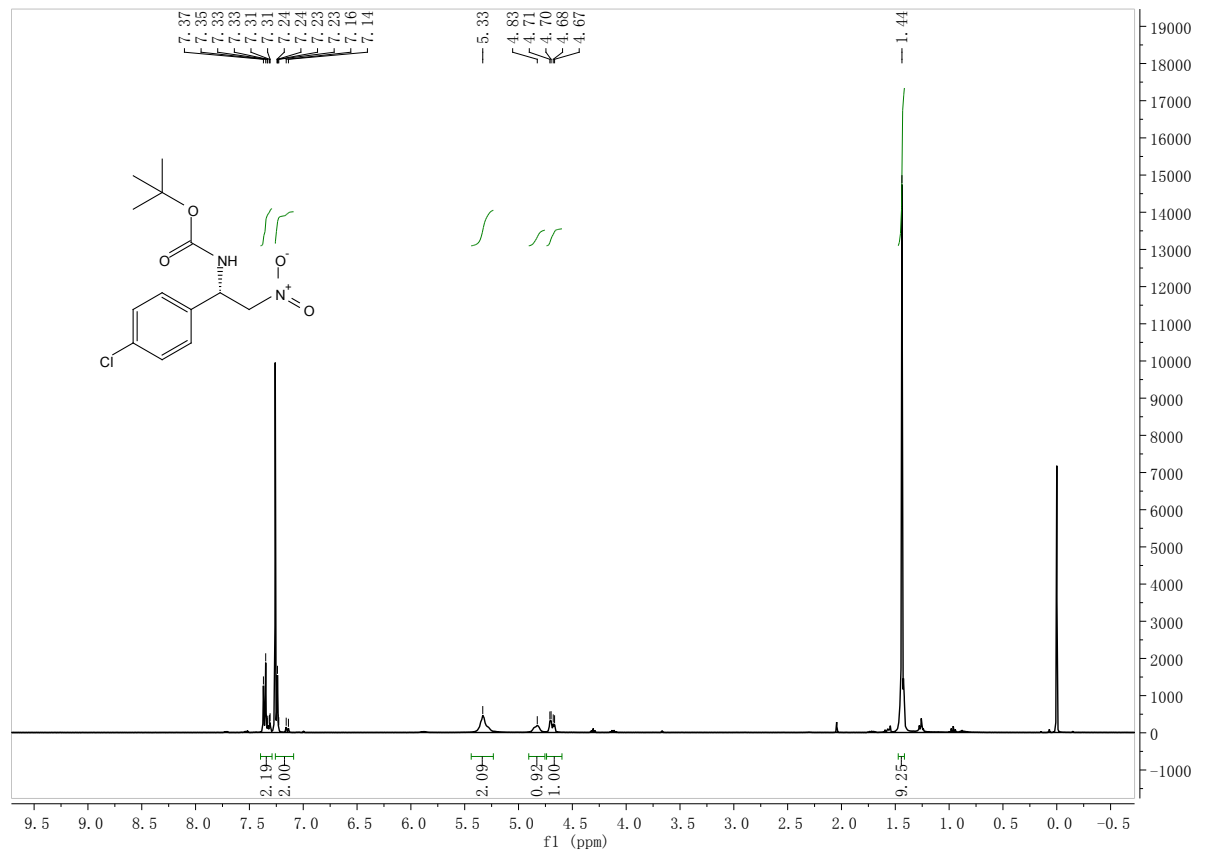

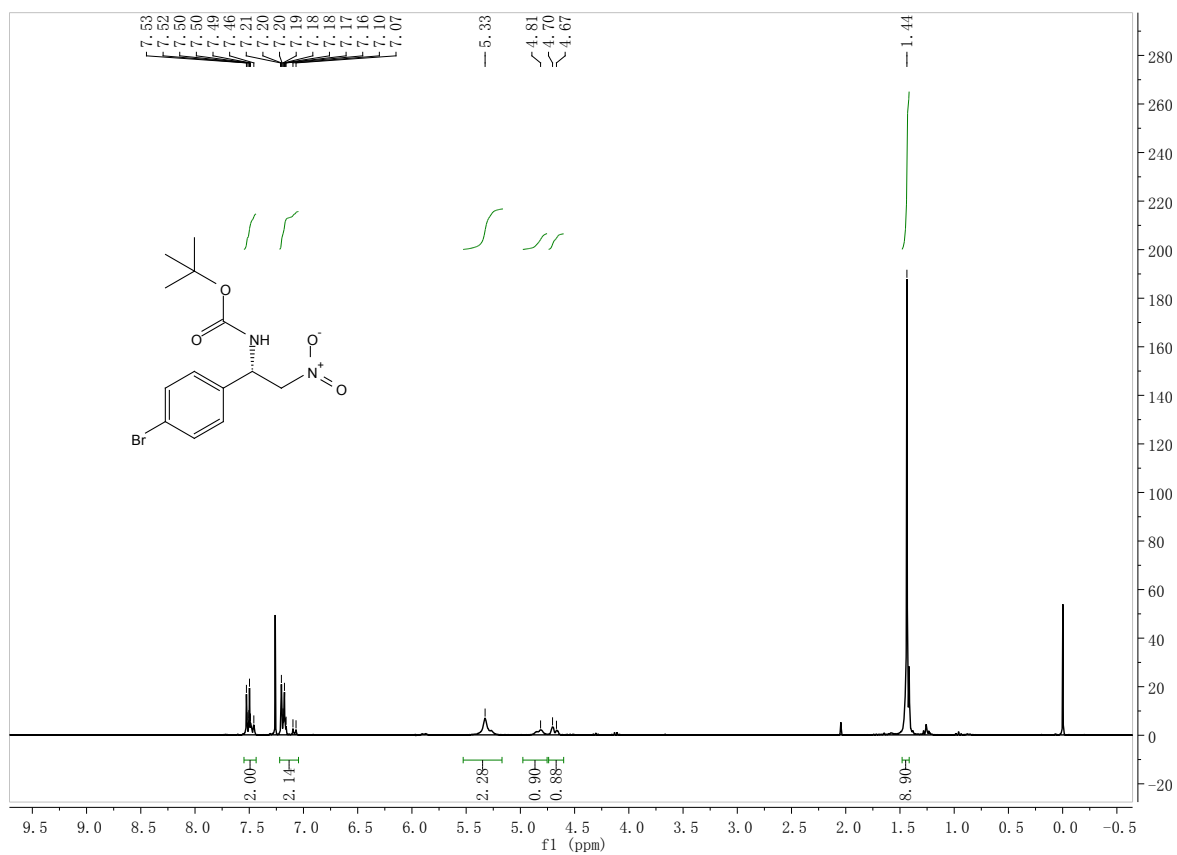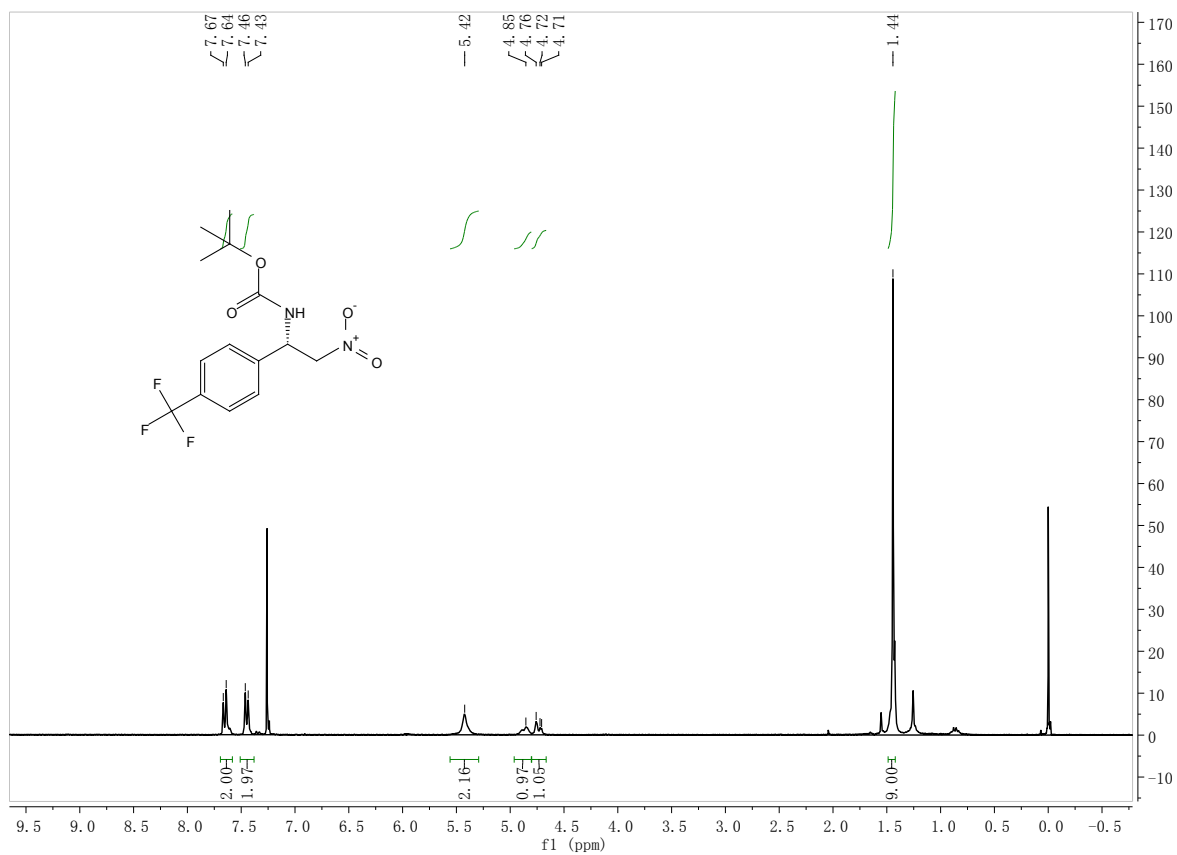

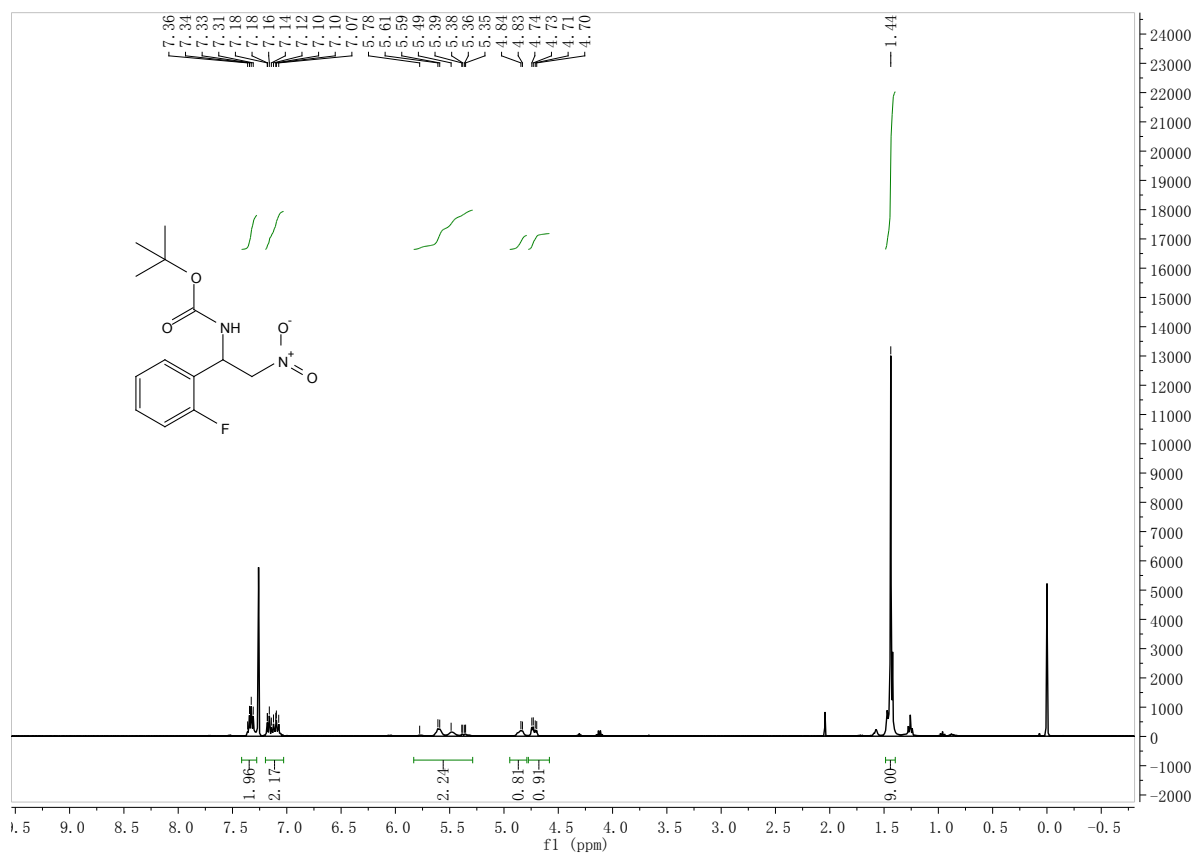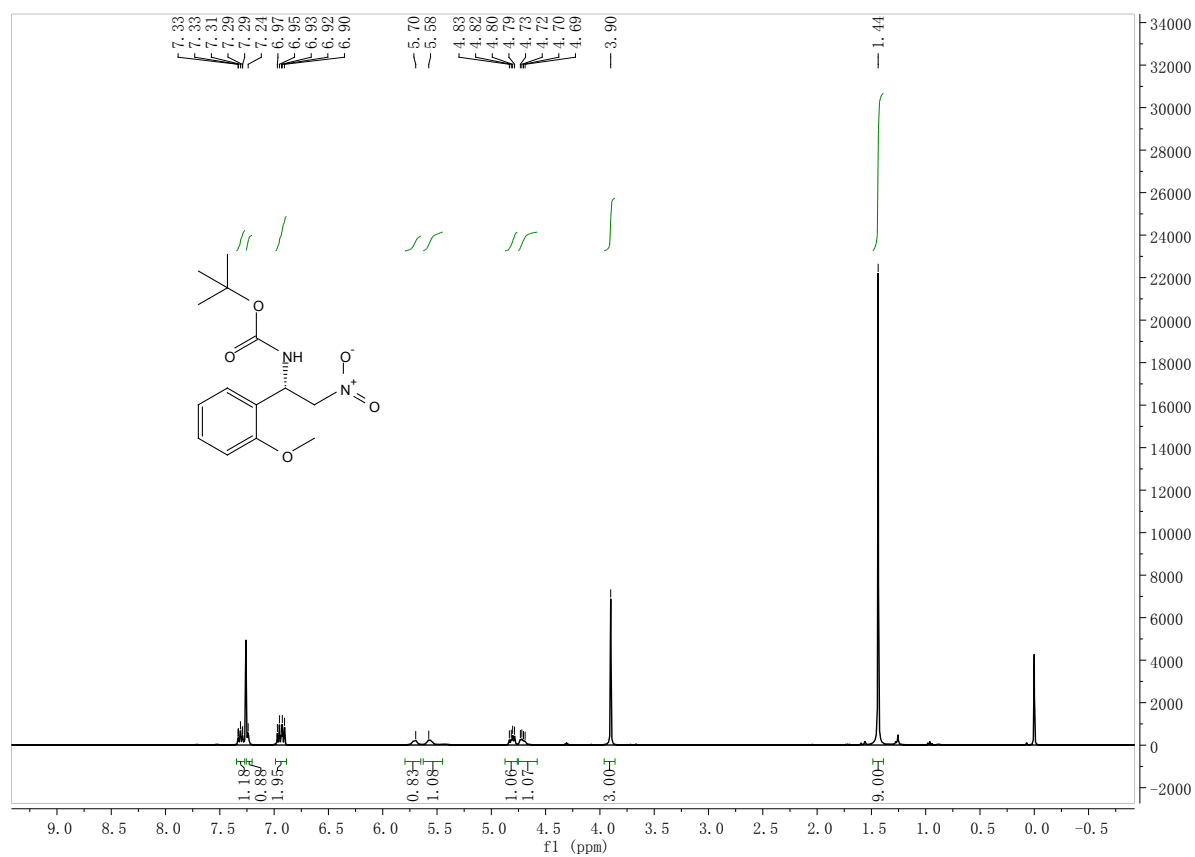

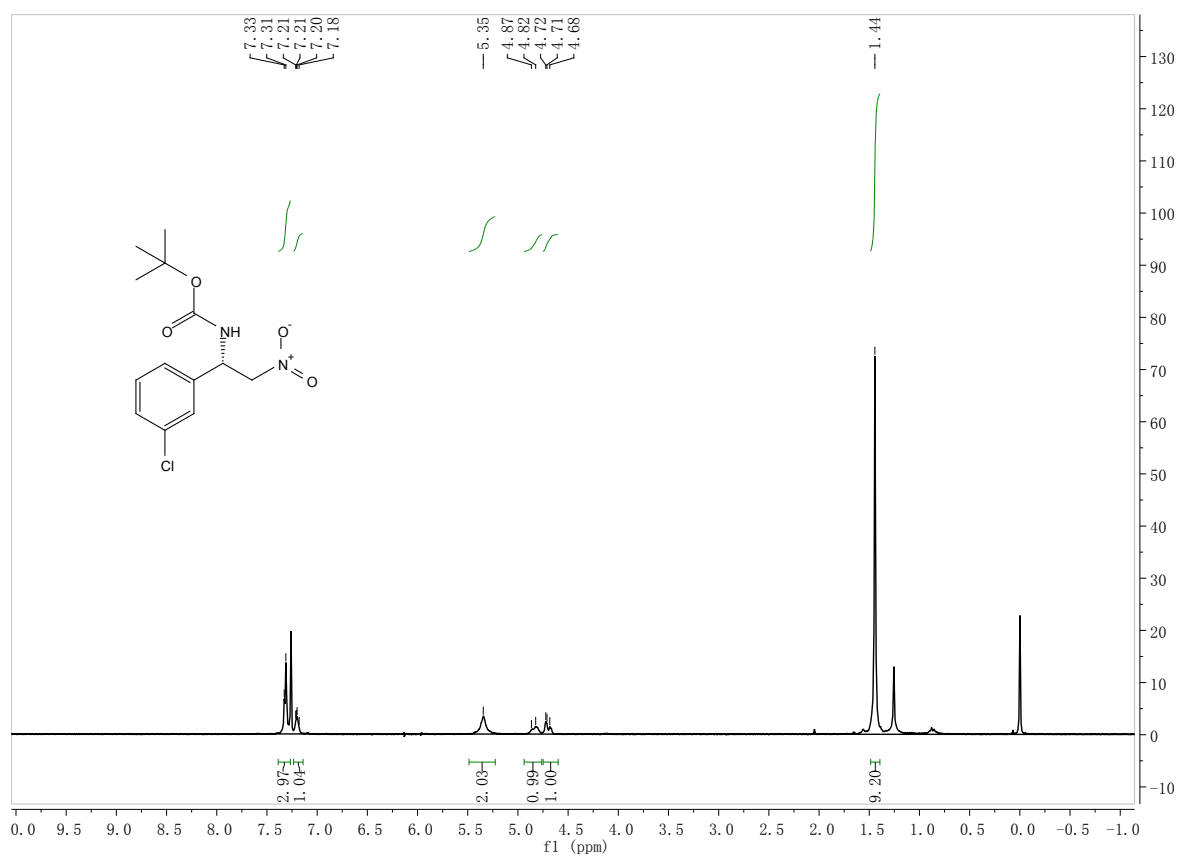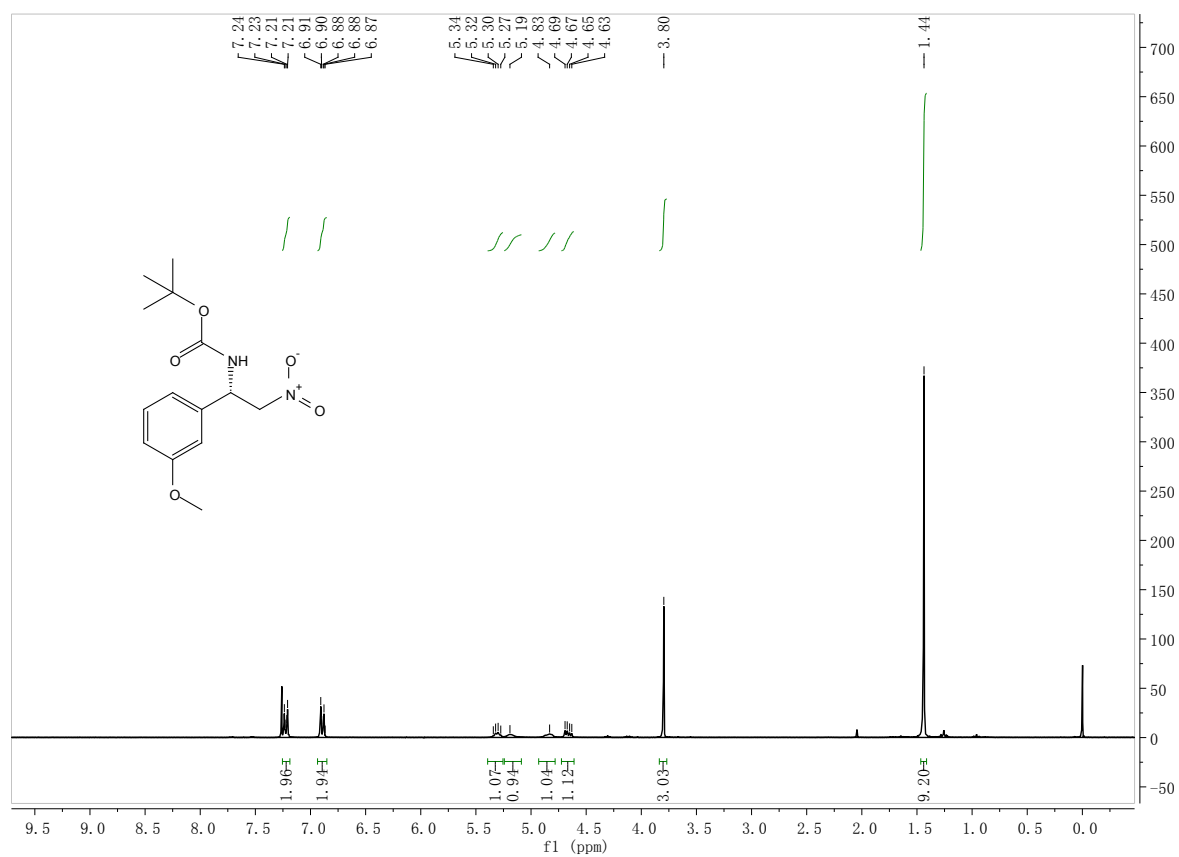

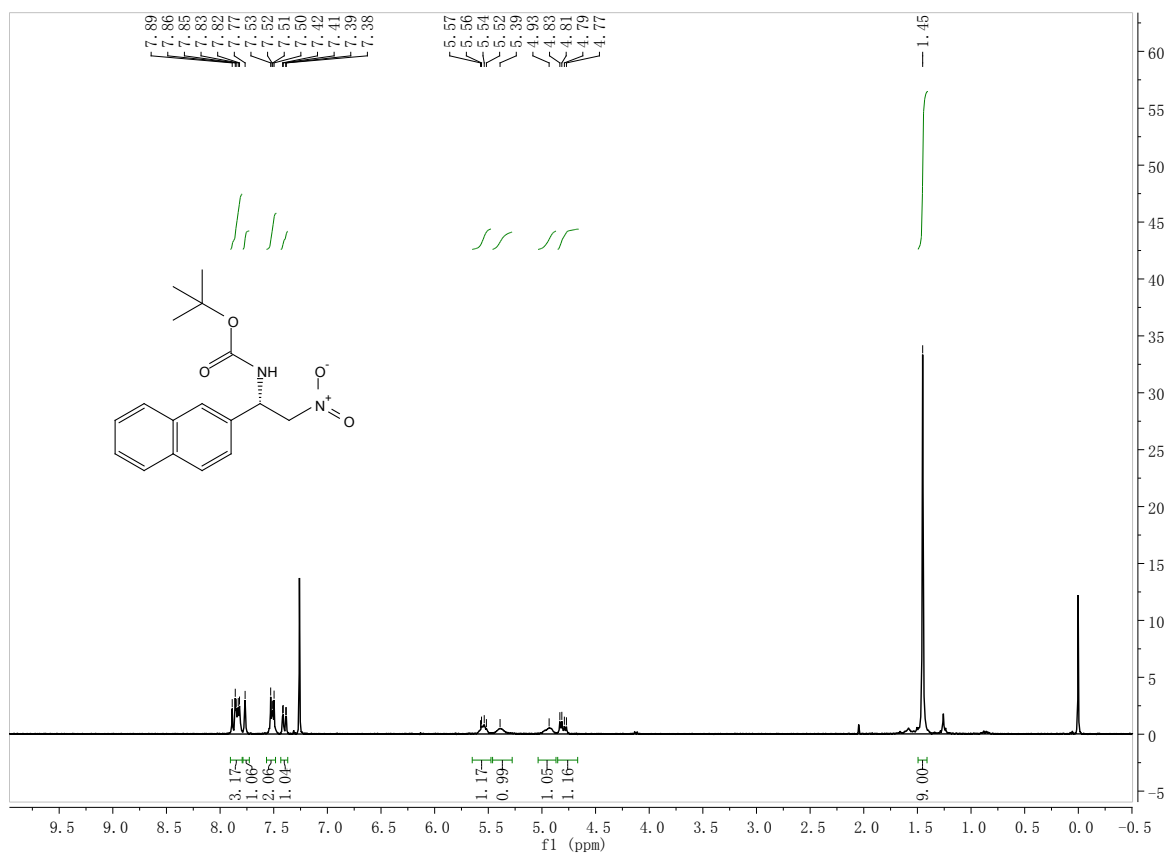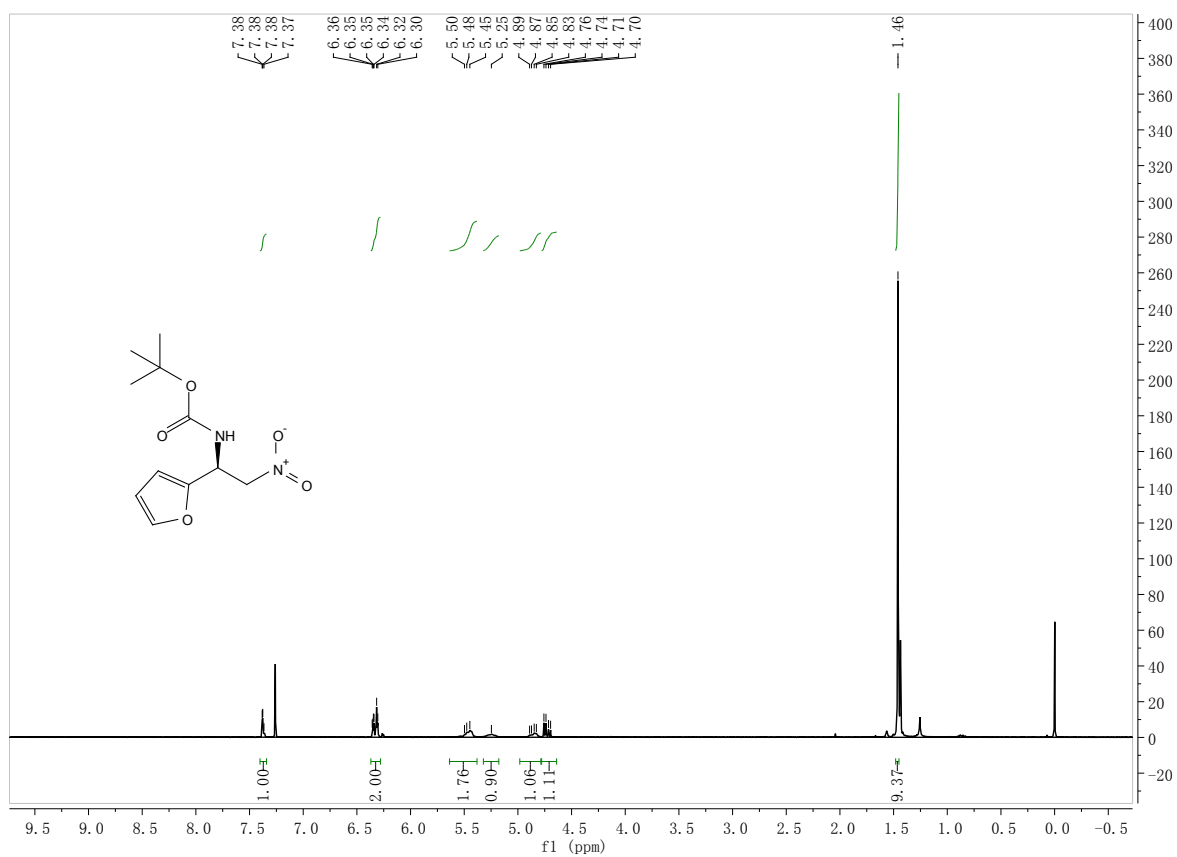

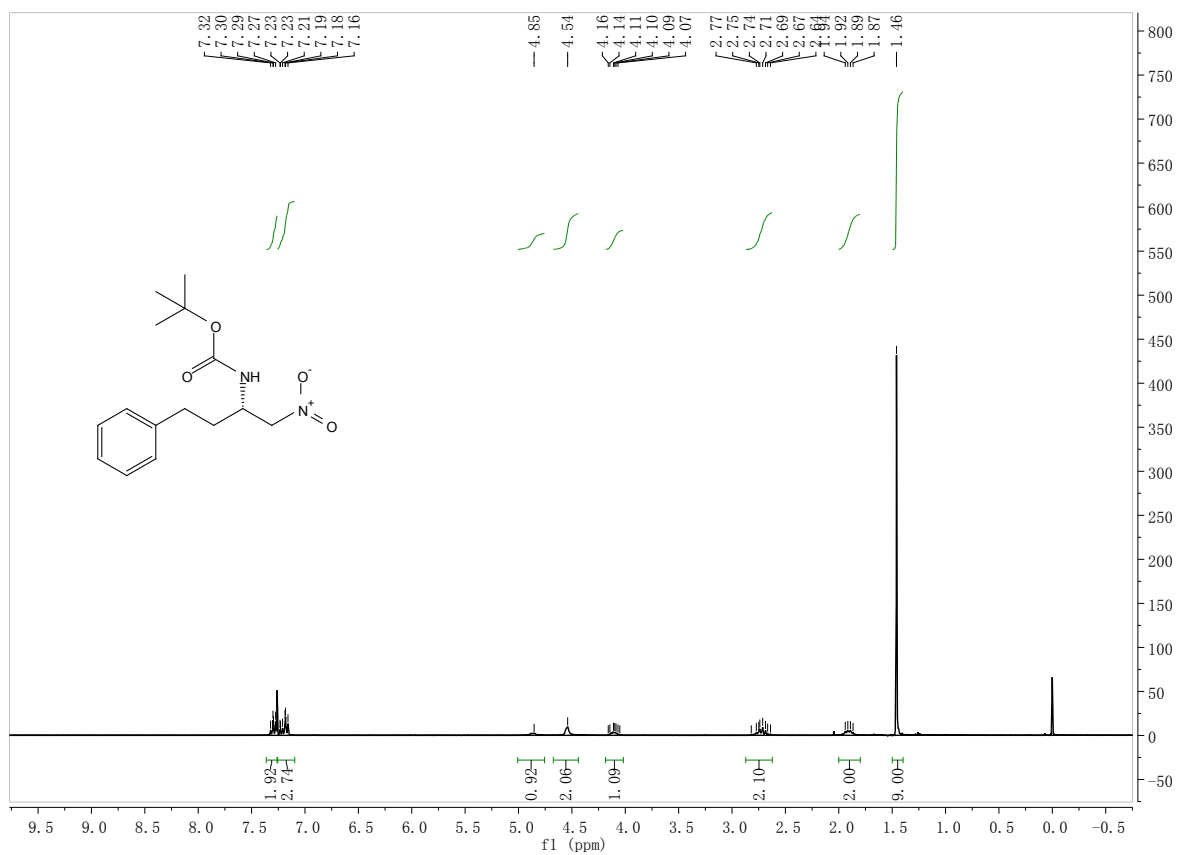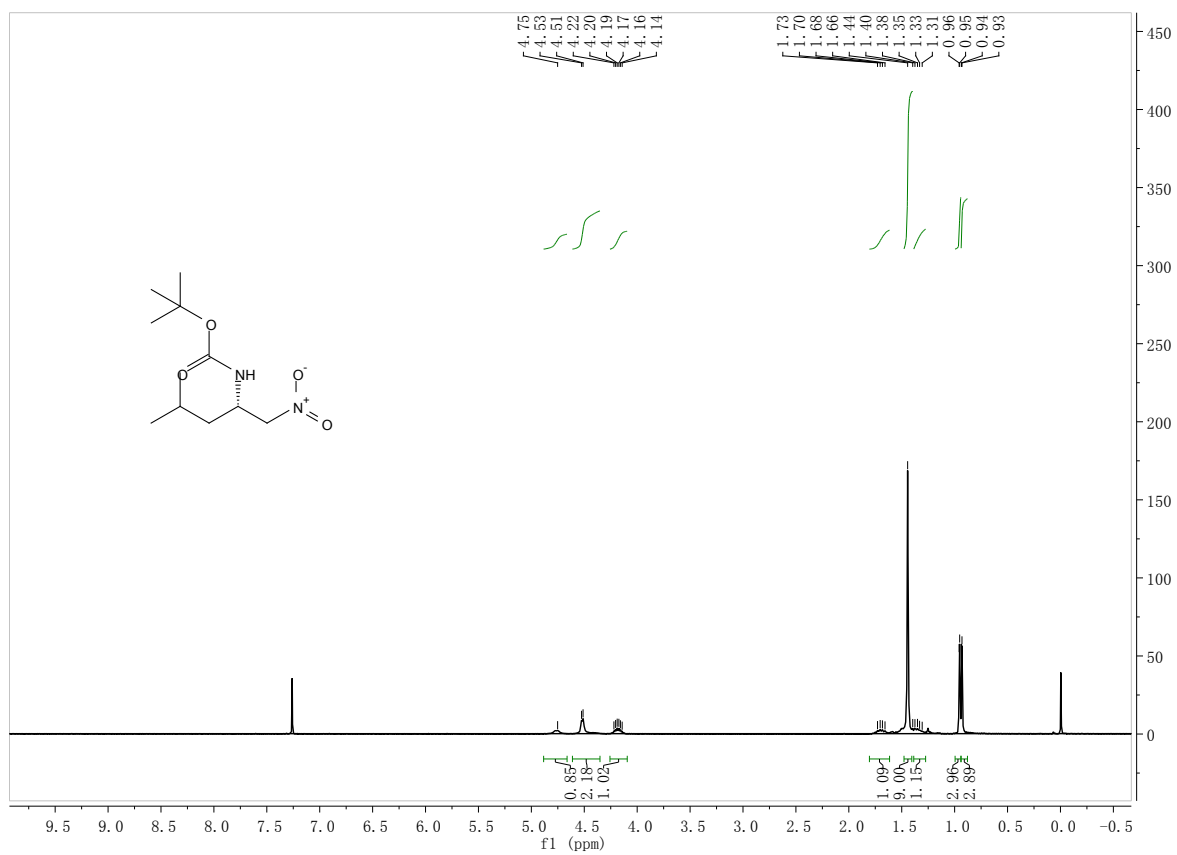

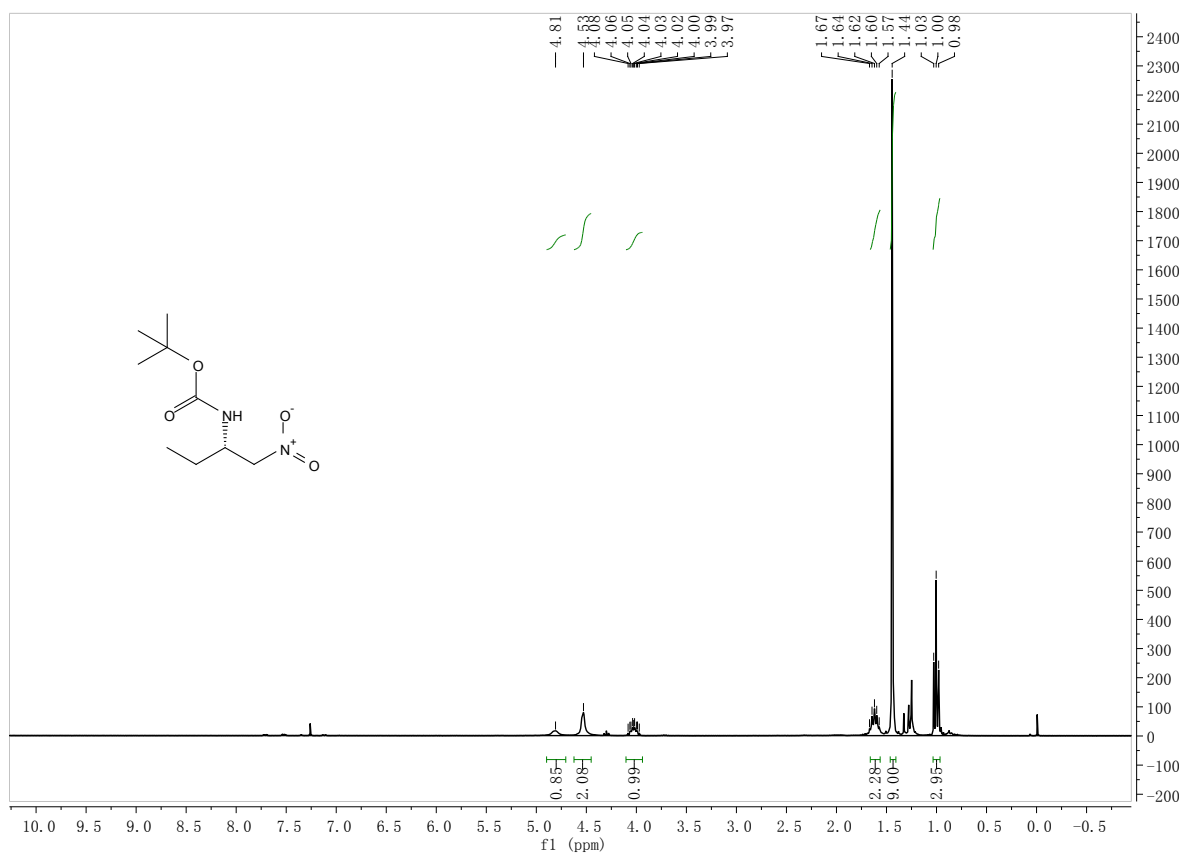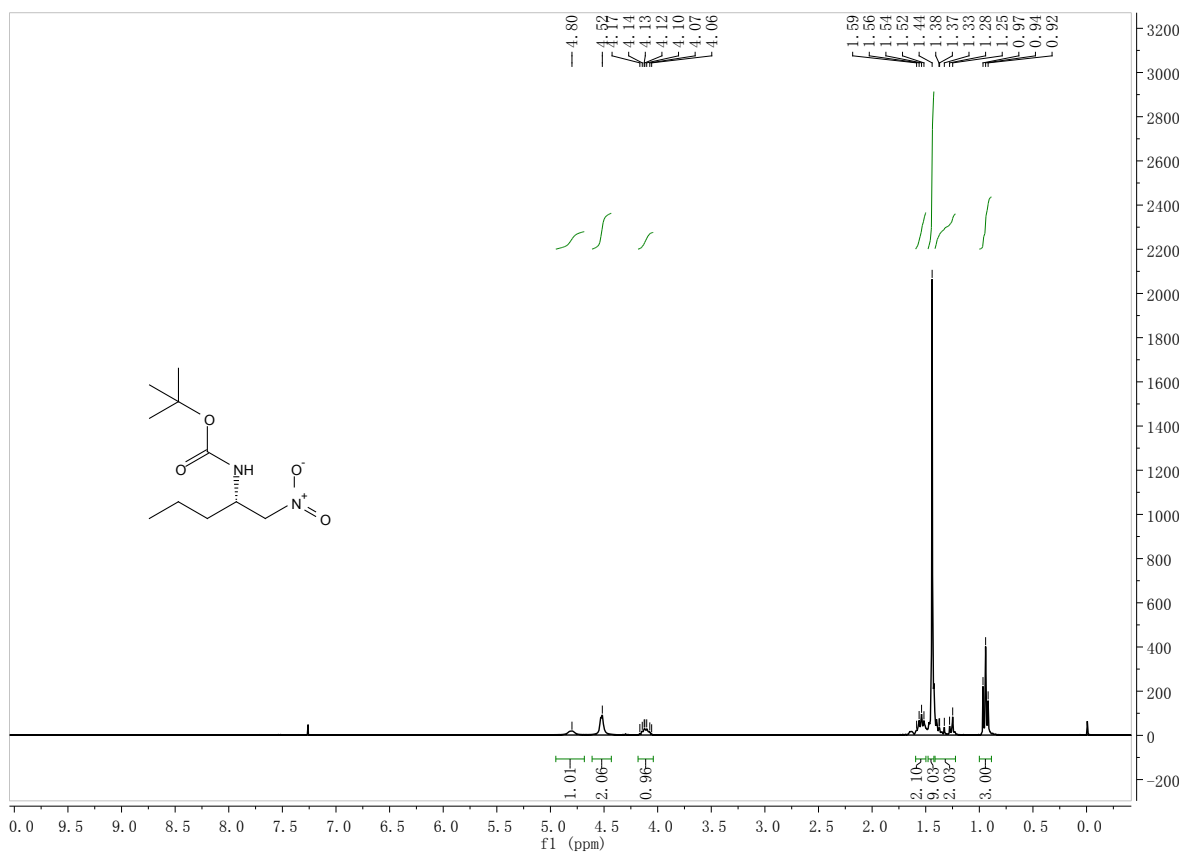



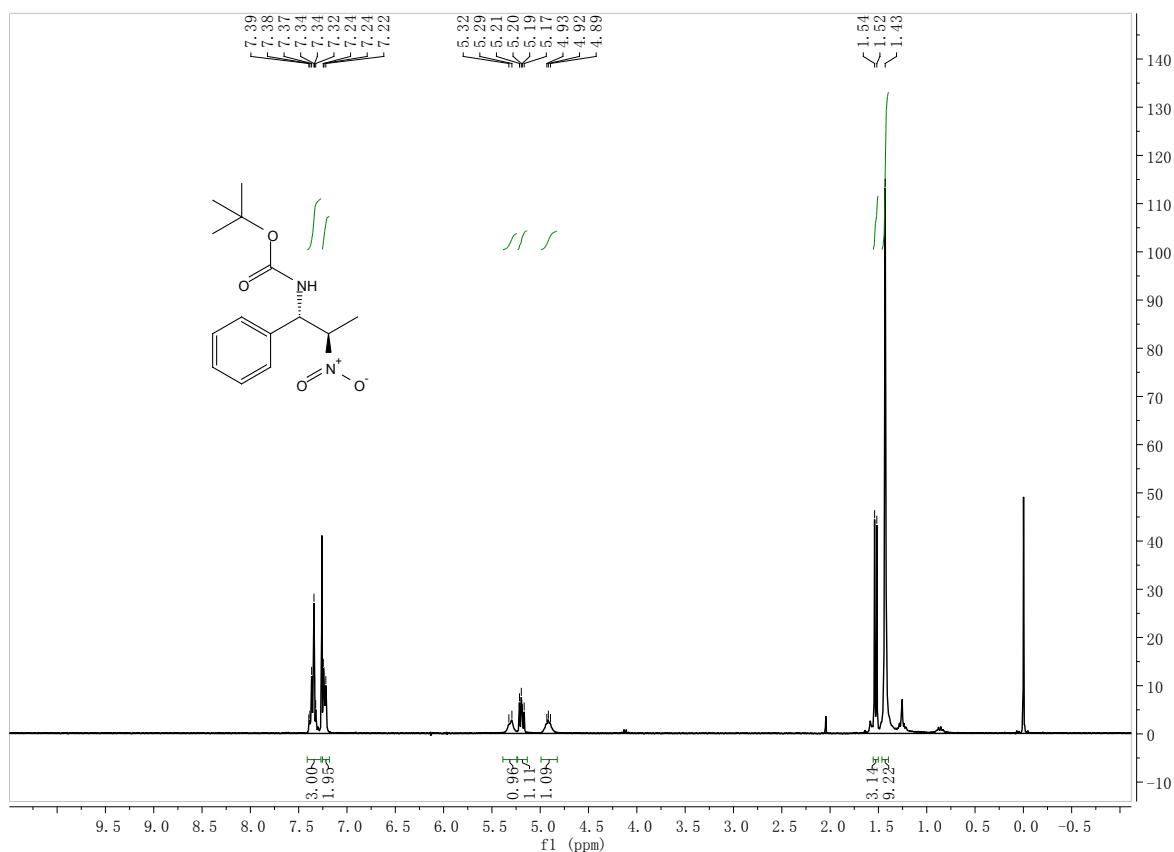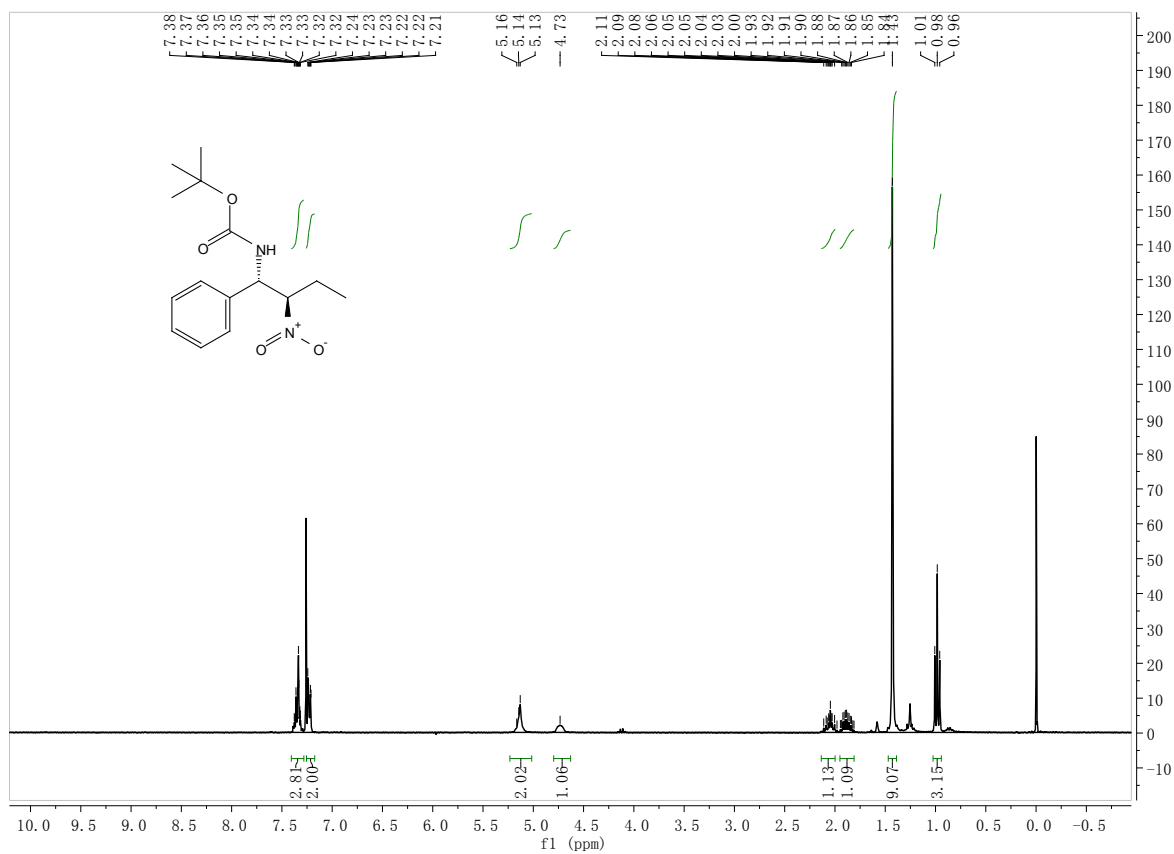

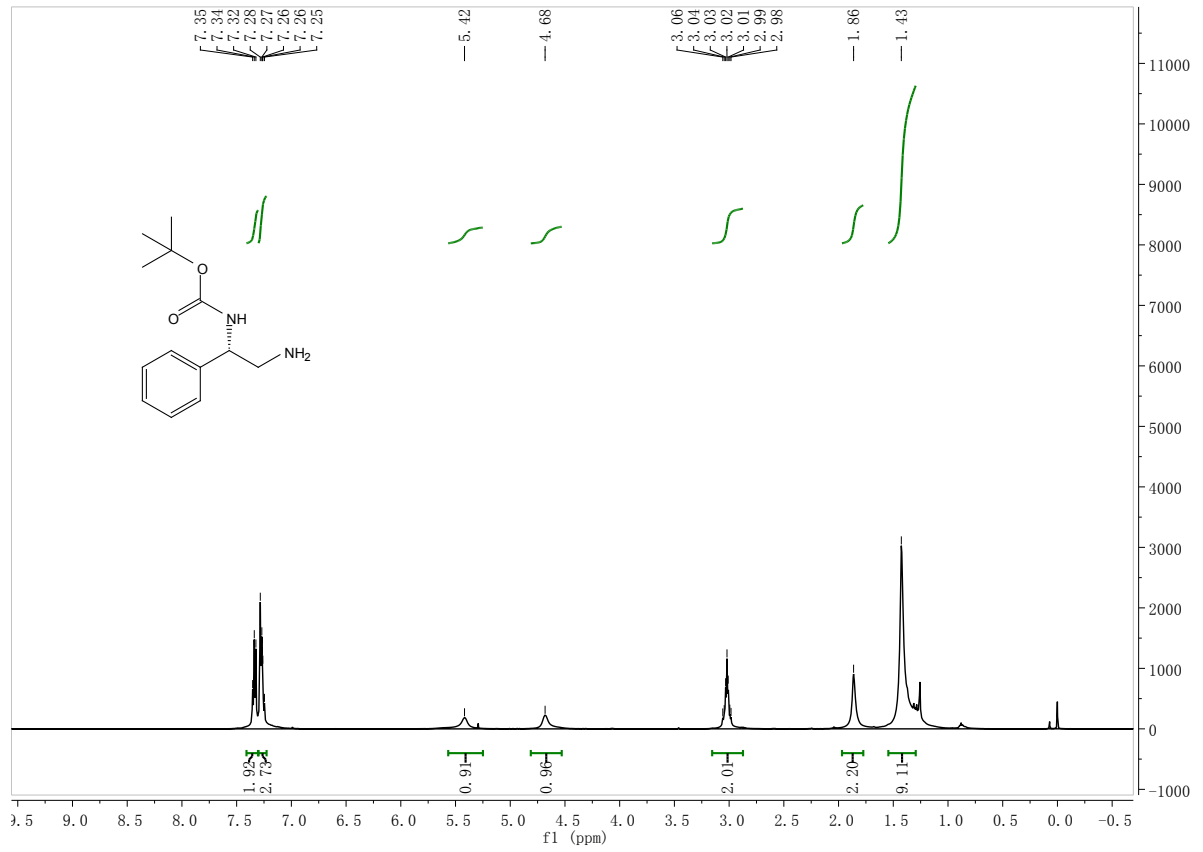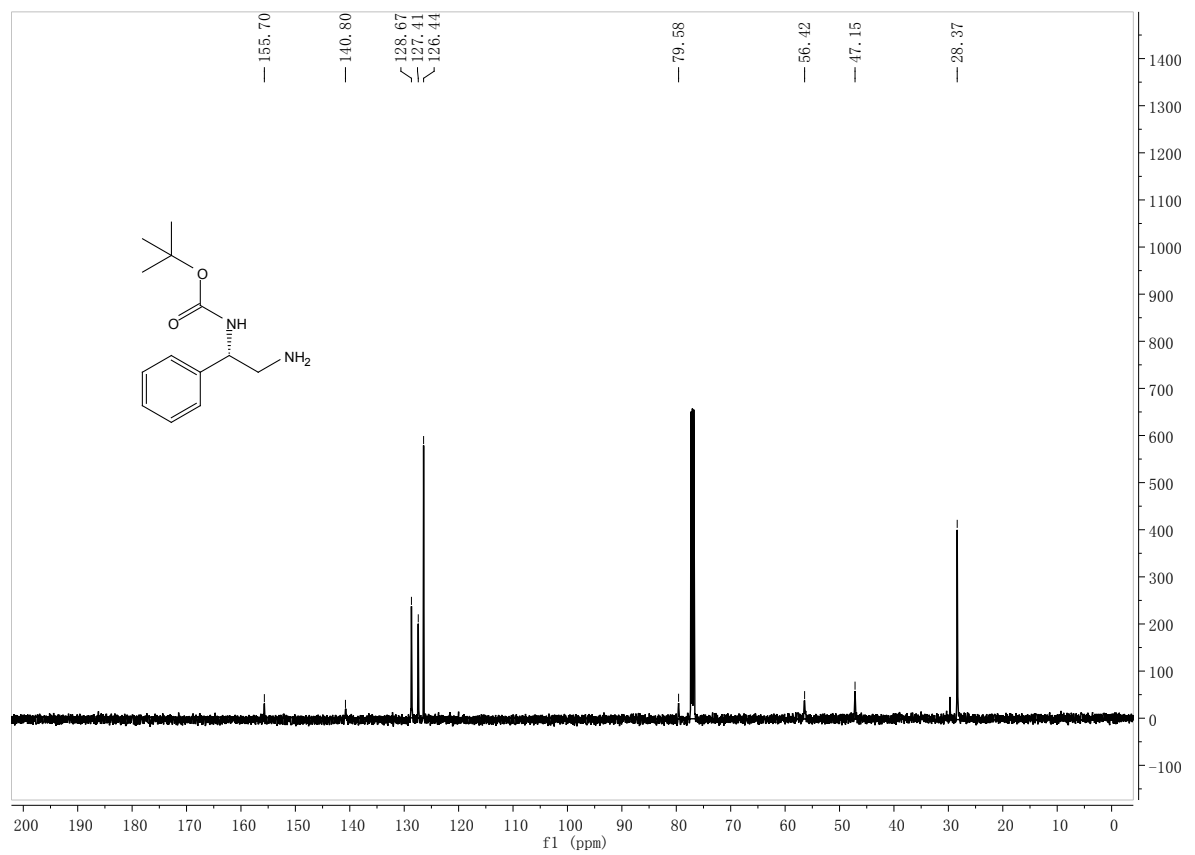

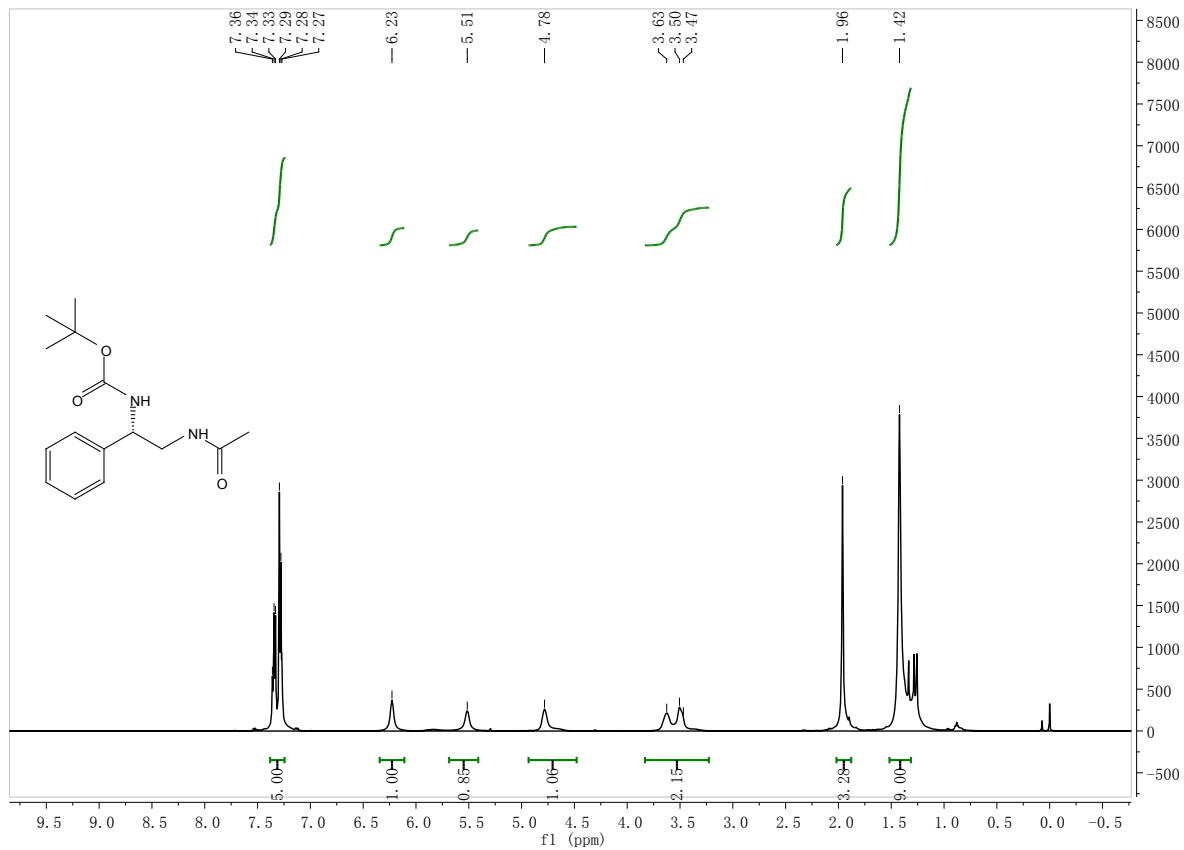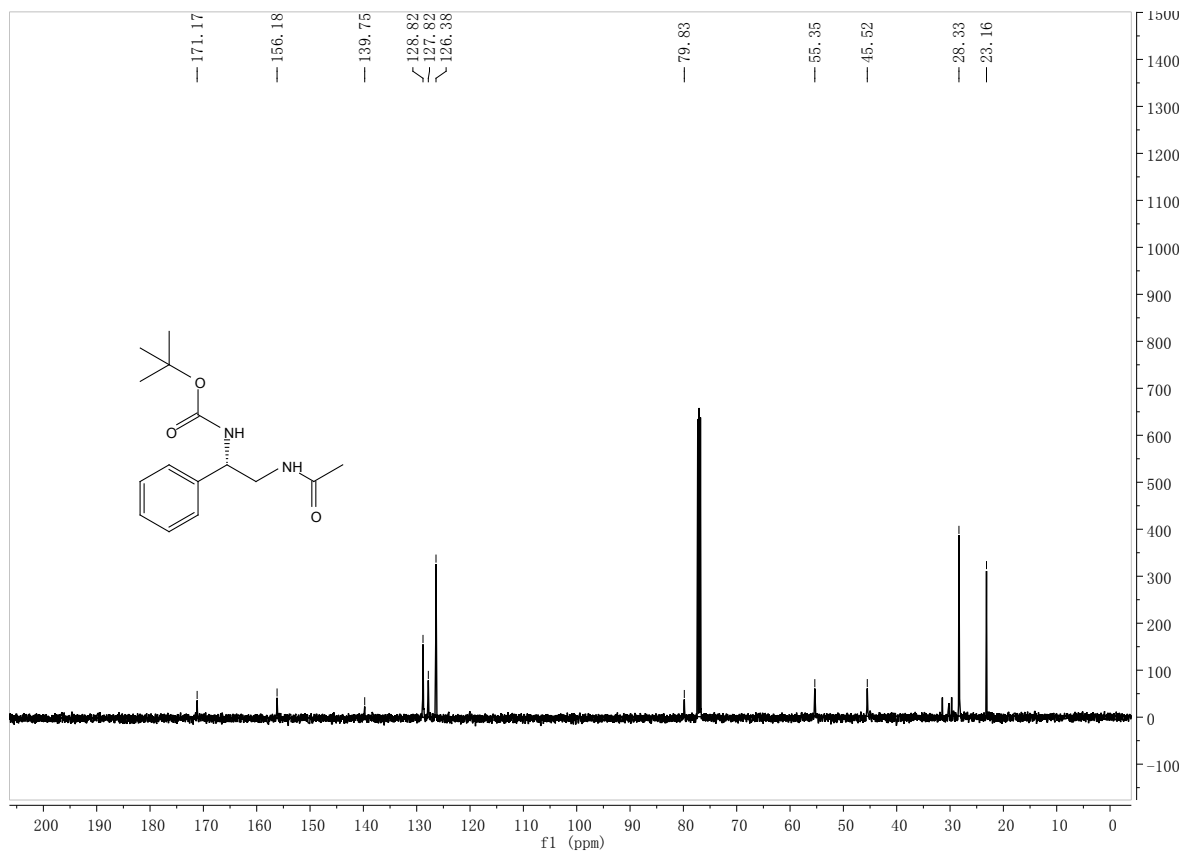

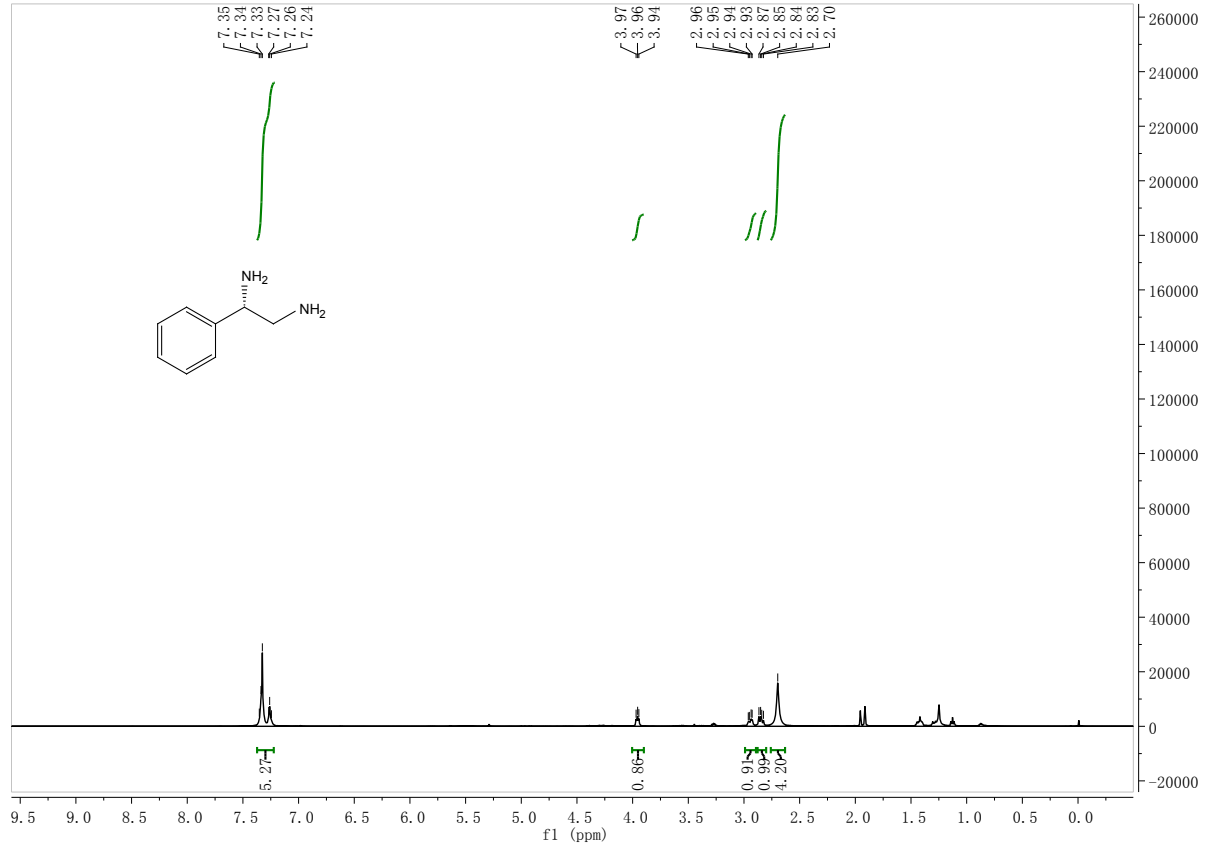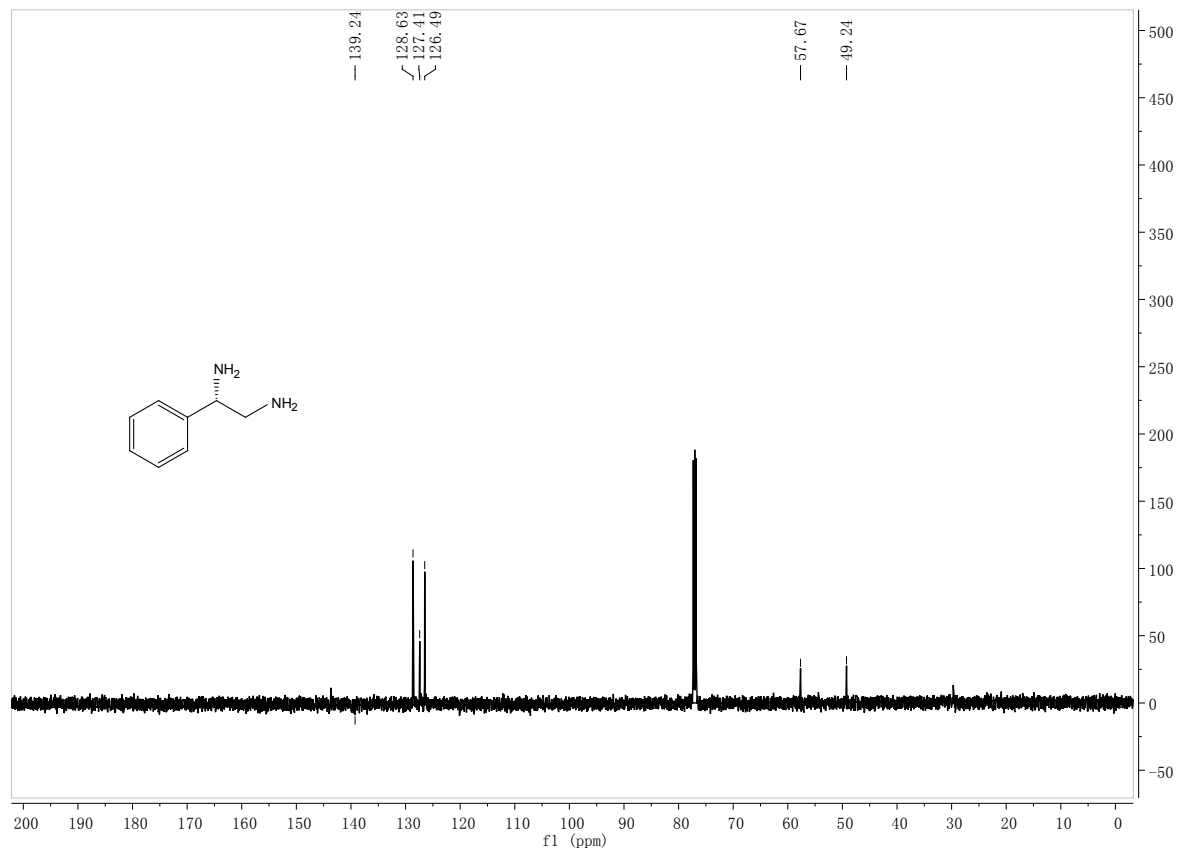

## 6. HPLC traces of all compounds

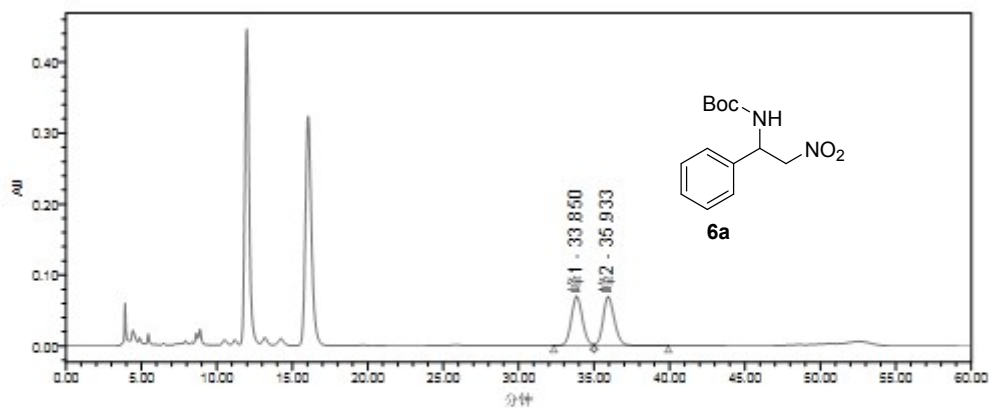

Channel: W2489 ChA; Channel Desc.: W2489 ChA 214nm; Processing Method: wb

|   | Channel Description | Peak Name | RT (min) | Area (面积*sec) | % Area | Height (面积) |
|---|---------------------|-----------|----------|---------------|--------|-------------|
| 1 | W2489 ChA 214nm     | 峰1        | 33.850   | 3546867       | 49.57  | 69082       |
| 2 | W2489 ChA 214nm     | 峰2        | 35.933   | 3608471       | 50.43  | 68827       |

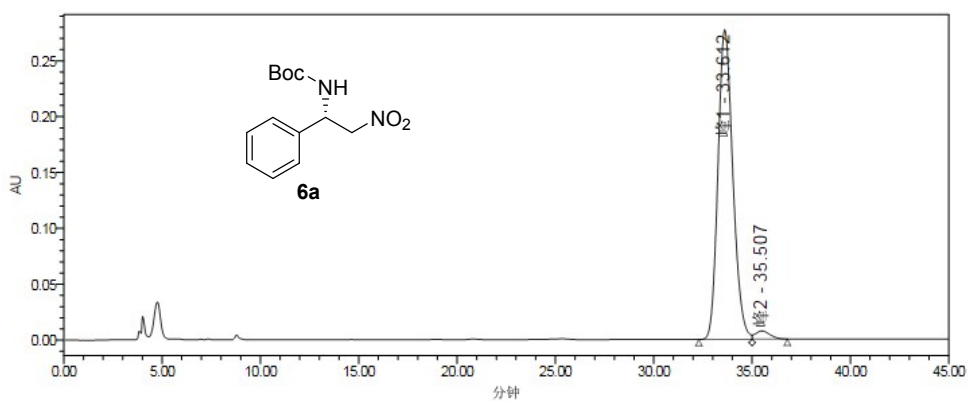

Channel: W2489 ChA; Channel Desc.: W2489 ChA 214nm; Processing Method: 0

|   | Channel Description | Peak Name | RT (min) | Area (面积*sec) | % Area | Height (面积) |
|---|---------------------|-----------|----------|---------------|--------|-------------|
| 1 | W2489 ChA 214nm     | 峰1        | 33.612   | 14549792      | 97.40  | 276812      |
| 2 | W2489 ChA 214nm     | 峰2        | 35.507   | 388259        | 2.60   | 7448        |

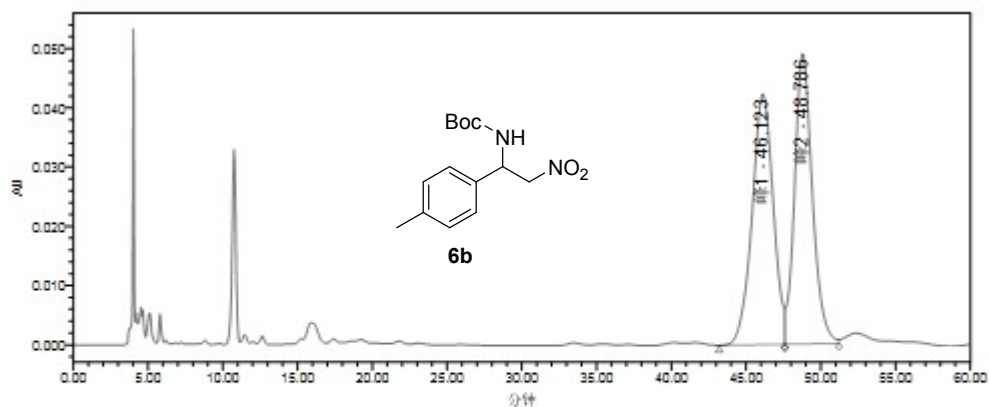

Channel: W2489 ChA; Channel Desc.: W2489 ChA 214nm; Processing Method: wb

|   | Channel Description | Peak Name | RT (min) | Area (峰*sec) | % Area | Height (峰) |
|---|---------------------|-----------|----------|--------------|--------|------------|
| 1 | W2489 ChA 214nm     | 峰1        | 46.123   | 4149392      | 50.67  | 42239      |
| 2 | W2489 ChA 214nm     | 峰2        | 48.786   | 4039337      | 49.33  | 48882      |

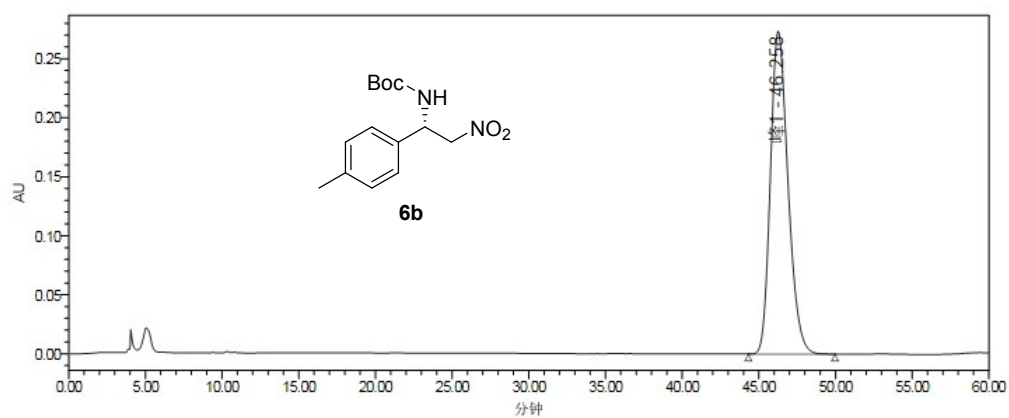

Channel: W2489 ChA; Channel Desc.: W2489 ChA 214nm; Processing Method: 0

|   | Channel Description | Peak Name | RT (min) | Area (峰*sec) | % Area | Height (峰) |
|---|---------------------|-----------|----------|--------------|--------|------------|
| 1 | W2489 ChA 214nm     | 峰1        | 46.258   | 21817664     | 100.00 | 273294     |

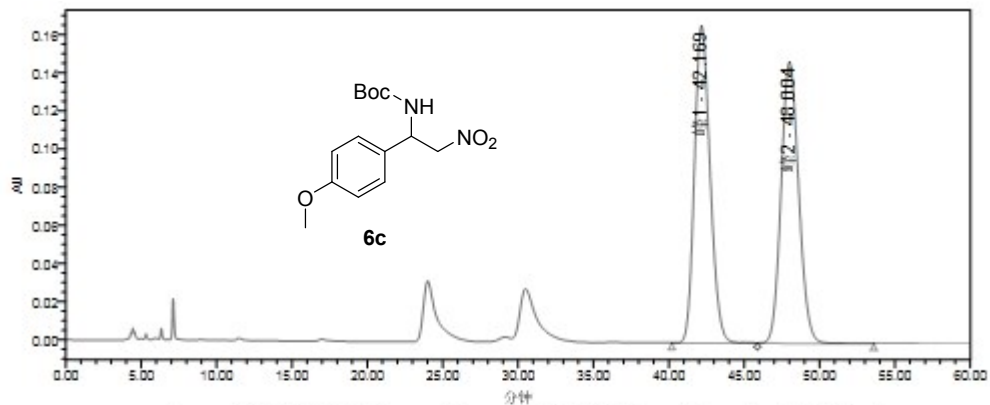

Channel: W2489 ChA; Channel Desc.: W2489 ChA 214nm; Processing Method: wb

| Channel Description | Peak Name | RT (min) | Area (峰*sec) | % Area | Height (峰) |
|---------------------|-----------|----------|--------------|--------|------------|
| W2489 ChA 214nm     | 峰1        | 42.169   | 11990348     | 50.08  | 168053     |
| W2489 ChA 214nm     | 峰2        | 48.004   | 11950824     | 49.92  | 147368     |

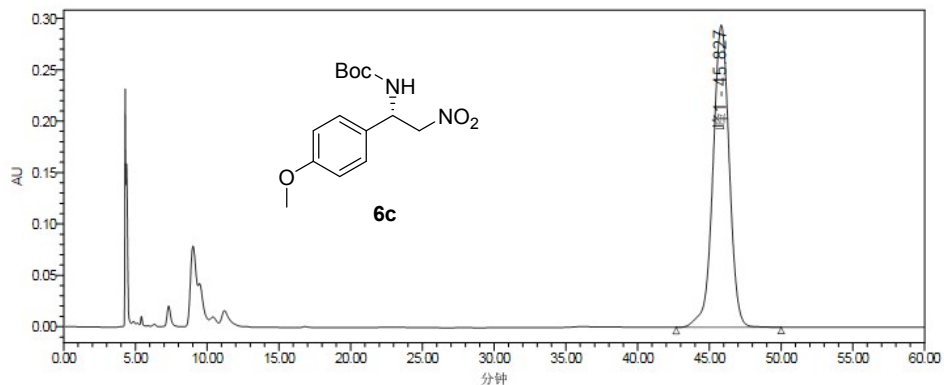

Channel: W2489 ChA; Channel Desc.: W2489 ChA 214nm; Processing Method: 0

| Channel Description | Peak Name | RT (min) | Area (峰*sec) | % Area | Height (峰) |
|---------------------|-----------|----------|--------------|--------|------------|
| W2489 ChA 214nm     | 峰1        | 45.827   | 23337495     | 100.00 | 293991     |

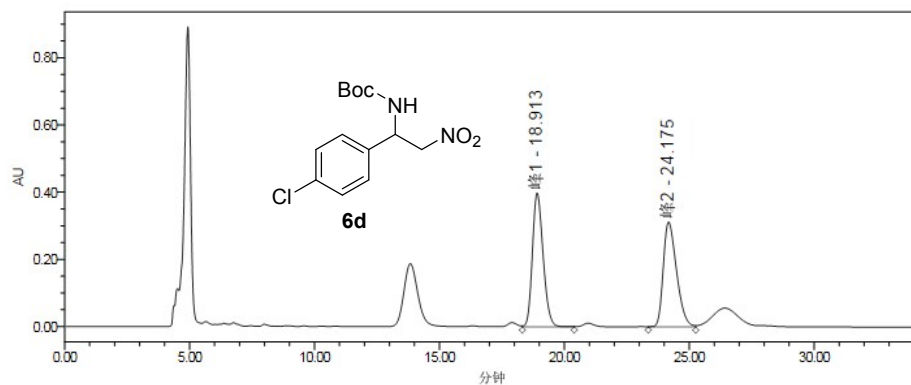

Channel: W2489 ChA; Channel Desc.: W2489 ChA 214nm; Processing Method: 0

| Channel Description | Peak Name | RT (min) | Area (峰*sec) | % Area | Height (峰) |
|---------------------|-----------|----------|--------------|--------|------------|
| W2489 ChA 214nm     | 峰1        | 18.913   | 11847971     | 50.69  | 397442     |
| W2489 ChA 214nm     | 峰2        | 24.175   | 11523649     | 49.31  | 311609     |

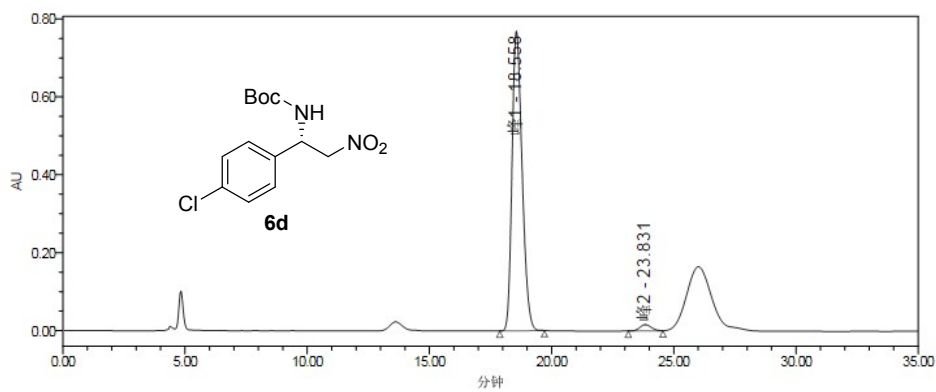

Channel: W2489 ChA; Channel Desc.: W2489 ChA 214nm; Processing Method: 0

|   | Channel Description | Peak Name | RT (min) | Area (礦*sec) | % Area | Height (礦) |
|---|---------------------|-----------|----------|--------------|--------|------------|
| 1 | W2489 ChA 214nm     | 峰1        | 18.558   | 21983635     | 97.65  | 768769     |
| 2 | W2489 ChA 214nm     | 峰2        | 23.831   | 530105       | 2.35   | 16196      |

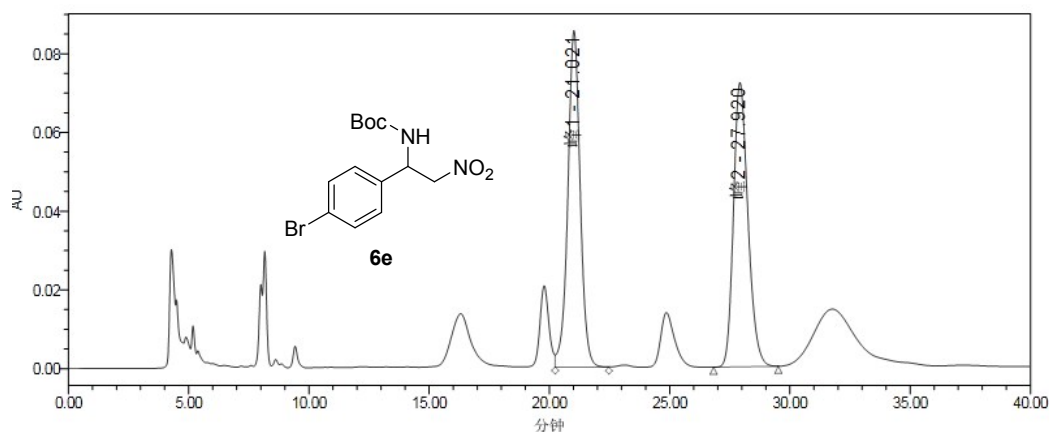

Channel: W2489 ChA; Channel Desc.: W2489 ChA 214nm; Processing Method: wb

|   | Channel Description | Peak Name | RT (min) | Area (礦*sec) | % Area | Height (礦) |
|---|---------------------|-----------|----------|--------------|--------|------------|
| 1 | W2489 ChA 214nm     | 峰1        | 21.021   | 3045724      | 50.22  | 85445      |
| 2 | W2489 ChA 214nm     | 峰2        | 27.920   | 3018560      | 49.78  | 72215      |

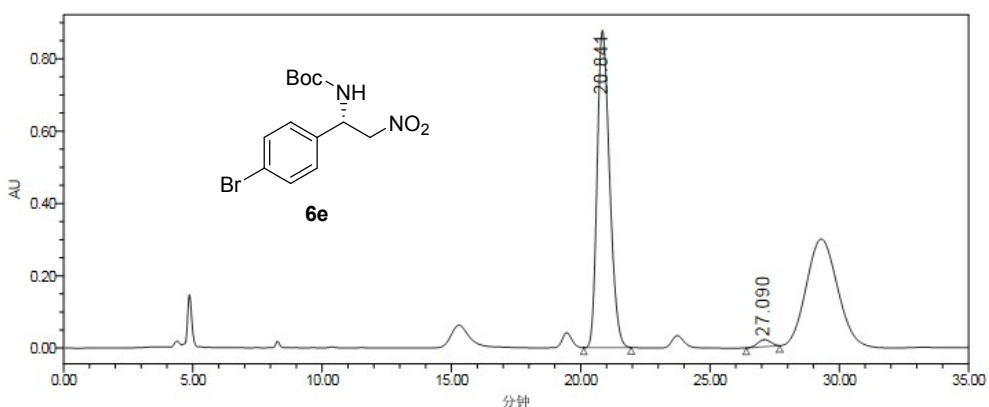

Channel: W2489 ChA; Channel Desc.: W2489 ChA 214nm; Processing Method: 0

|   | Channel Description | RT (min) | Area (礦*sec) | % Area | Height (礦) |
|---|---------------------|----------|--------------|--------|------------|
| 1 | W2489 ChA 214nm     | 20.841   | 29305028     | 97.72  | 876509     |
| 2 | W2489 ChA 214nm     | 27.090   | 682610       | 2.28   | 19429      |



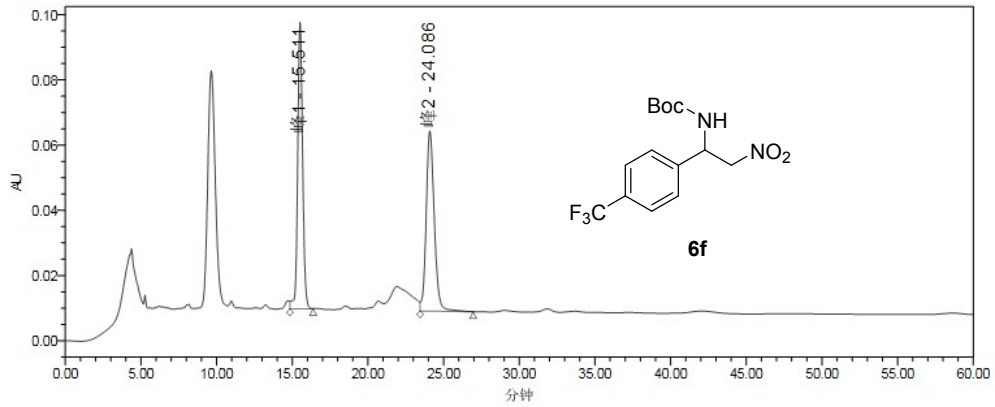

|   | Channel Description | Peak Name | RT (min) | Area (峰*sec) | % Area | Height (峰) |
|---|---------------------|-----------|----------|--------------|--------|------------|
| 1 | W2489 ChA 214nm     | 峰1        | 15.511   | 1983950      | 49.17  | 87756      |
| 2 | W2489 ChA 214nm     | 峰2        | 24.086   | 2050568      | 50.83  | 55160      |

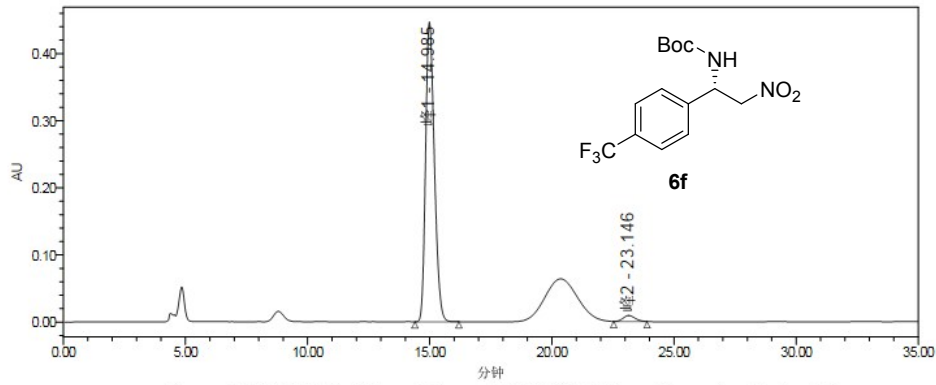

|   | Channel Description | Peak Name | RT (min) | Area (峰*sec) | % Area | Height (峰) |
|---|---------------------|-----------|----------|--------------|--------|------------|
| 1 | W2489 ChA 214nm     | 峰1        | 14.985   | 11127945     | 97.35  | 446424     |
| 2 | W2489 ChA 214nm     | 峰2        | 23.146   | 303188       | 2.65   | 8955       |

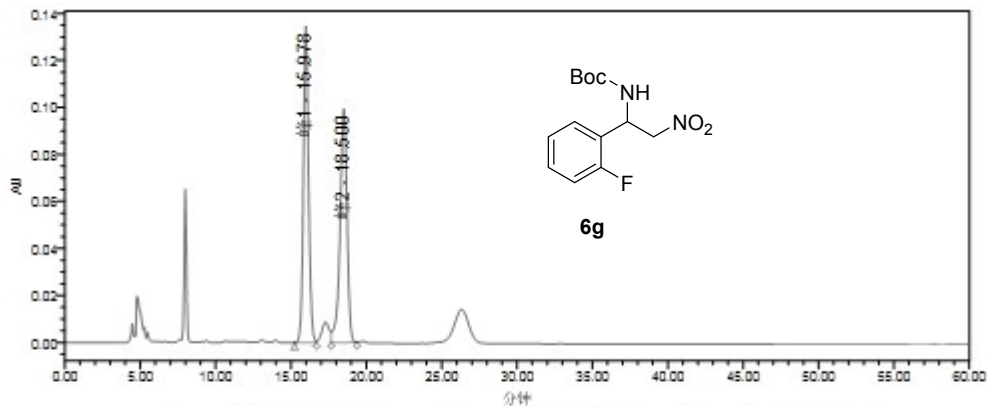

|   | Channel Description | Peak Name | RT (min) | Area (峰*sec) | % Area | Height (峰) |
|---|---------------------|-----------|----------|--------------|--------|------------|
| 1 | W2489 ChA 214nm     | 峰1        | 15.978   | 3188626      | 49.96  | 134239     |
| 2 | W2489 ChA 214nm     | 峰2        | 18.500   | 3194203      | 50.04  | 99036      |

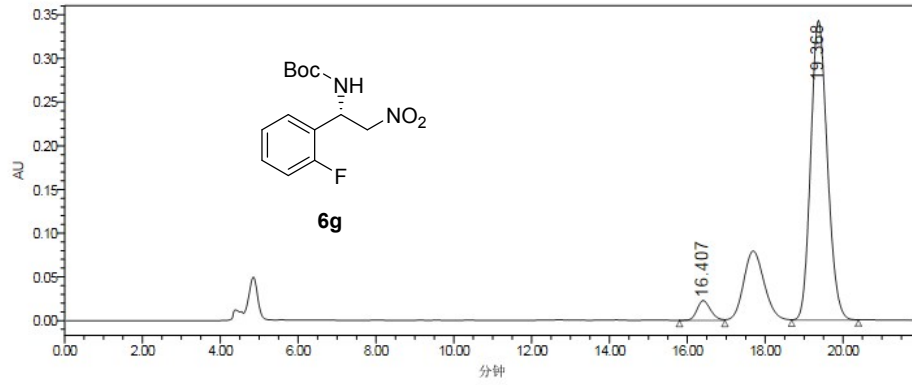

Channel: W2489 ChA; Channel Desc.: W2489 ChA 214nm; Processing Method: 0

|   | Channel Description | RT (min) | Area (峰*sec) | % Area | Height (峰) |
|---|---------------------|----------|--------------|--------|------------|
| 1 | W2489 ChA 214nm     | 16.407   | 540015       | 5.04   | 22515      |
| 2 | W2489 ChA 214nm     | 19.368   | 10177408     | 94.96  | 342540     |

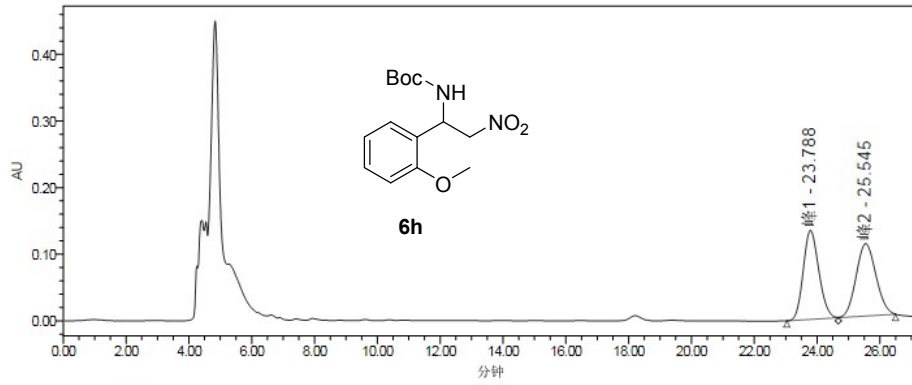

Channel: W2489 ChA; Channel Desc.: W2489 ChA 214nm; Processing Method: 0

|   | Channel Description | Peak Name | RT (min) | Area (峰*sec) | % Area | Height (峰) |
|---|---------------------|-----------|----------|--------------|--------|------------|
| 1 | W2489 ChA 214nm     | 峰1        | 23.788   | 4608209      | 49.18  | 133607     |
| 2 | W2489 ChA 214nm     | 峰2        | 25.545   | 4762282      | 50.82  | 108613     |

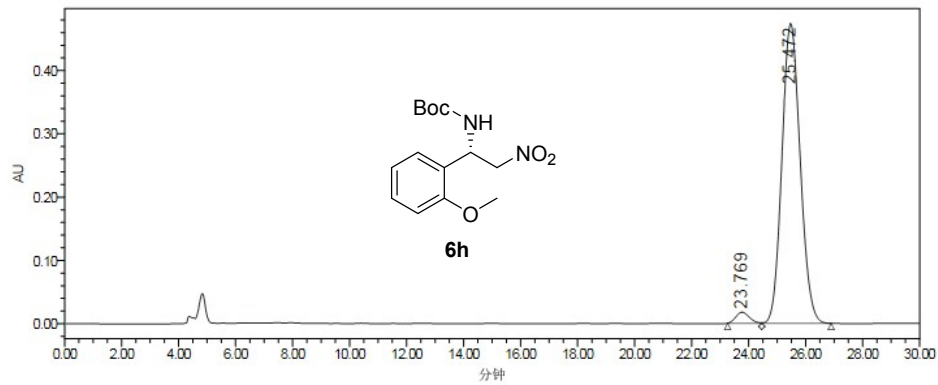

Channel: W2489 ChA; Channel Desc.: W2489 ChA 214nm; Processing Method: 0

|   | Channel Description | RT (min) | Area (峰*sec) | % Area | Height (峰) |
|---|---------------------|----------|--------------|--------|------------|
| 1 | W2489 ChA 214nm     | 23.769   | 571495       | 2.64   | 17499      |
| 2 | W2489 ChA 214nm     | 25.472   | 21082572     | 97.36  | 473571     |

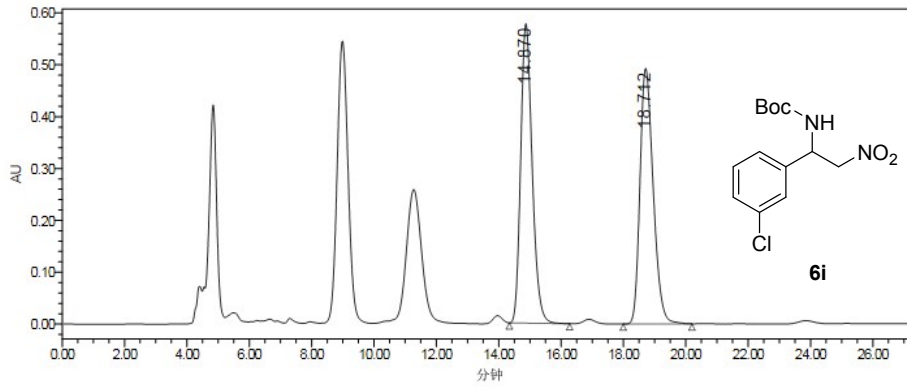

|   | Channel Description | RT (min) | Area (峰*sec) | % Area | Height (峰) |
|---|---------------------|----------|--------------|--------|------------|
| 1 | W2489 ChA 214nm     | 14.870   | 14747139     | 50.36  | 576902     |
| 2 | W2489 ChA 214nm     | 18.712   | 14535749     | 49.64  | 492603     |

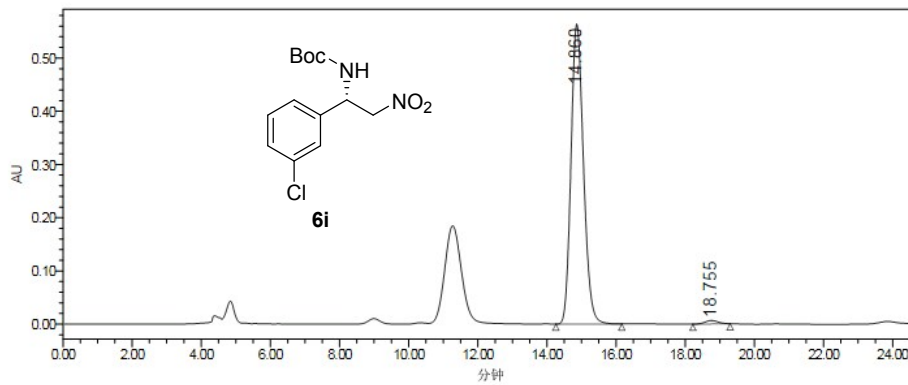

|   | Channel Description | RT (min) | Area (峰*sec) | % Area | Height (峰) |
|---|---------------------|----------|--------------|--------|------------|
| 1 | W2489 ChA 214nm     | 14.860   | 14111214     | 98.80  | 563256     |
| 2 | W2489 ChA 214nm     | 18.755   | 170968       | 1.20   | 6423       |

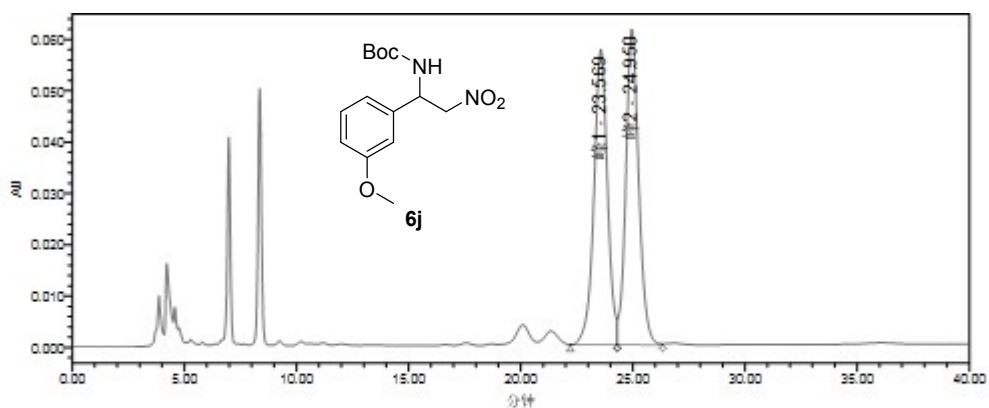

| Channel Description | Peak Name | RT (min) | Area (峰*sec) | % Area | Height (峰) |
|---------------------|-----------|----------|--------------|--------|------------|
| 1 W2489 ChA 214nm   | 峰1        | 23.569   | 2412474      | 49.81  | 57390      |
| 2 W2489 ChA 214nm   | 峰2        | 24.950   | 2450031      | 50.39  | 61332      |

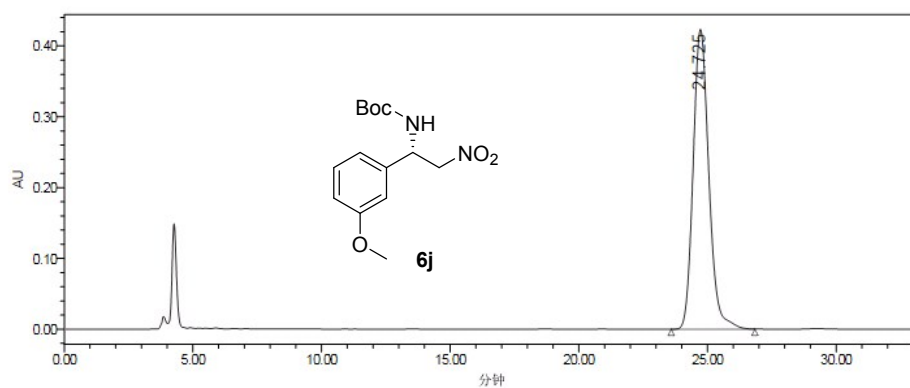

| Channel Description | RT (min) | Area (峰*sec) | % Area | Height (峰) |
|---------------------|----------|--------------|--------|------------|
| 1 W2489 ChA 214nm   | 24.725   | 17908798     | 100.00 | 423129     |

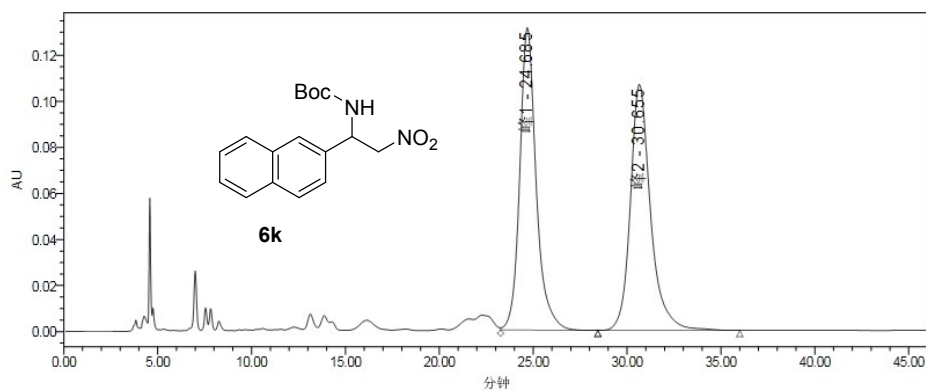

| Channel Description | Peak Name | RT (min) | Area (峰*sec) | % Area | Height (峰) |
|---------------------|-----------|----------|--------------|--------|------------|
| 1 W2489 ChA 214nm   | 峰1        | 24.685   | 7978981      | 49.90  | 131219     |
| 2 W2489 ChA 214nm   | 峰2        | 30.655   | 8009634      | 50.10  | 106769     |

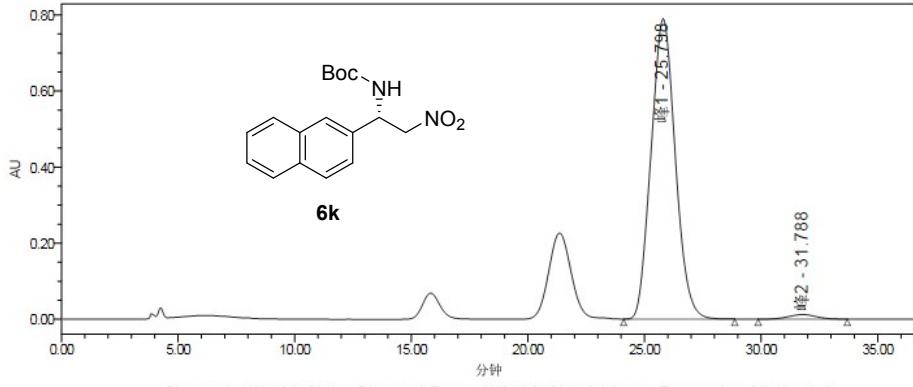

Channel: W2489 ChA; Channel Desc.: W2489 ChA 214nm; Processing Method: 0

| Channel Description | Peak Name | RT (min) | Area (磺*sec) | % Area | Height (磺) |
|---------------------|-----------|----------|--------------|--------|------------|
| W2489 ChA 214nm     | 峰1        | 25.798   | 57092152     | 98.25  | 789215     |
| W2489 ChA 214nm     | 峰2        | 31.788   | 1014975      | 1.75   | 12168      |

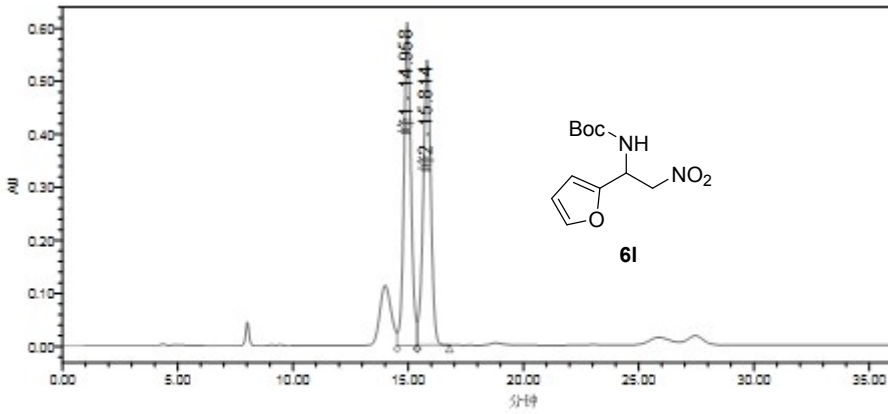

Channel: W2489 ChA; Channel Desc.: W2489 ChA 214nm; Processing Method: w

| Channel Description | Peak Name | RT (min) | Area (磺*sec) | % Area | Height (磺) |
|---------------------|-----------|----------|--------------|--------|------------|
| W2489 ChA 214nm     | 峰1        | 14.958   | 12878928     | 50.84  | 607398     |
| W2489 ChA 214nm     | 峰2        | 15.814   | 12450909     | 49.16  | 537097     |

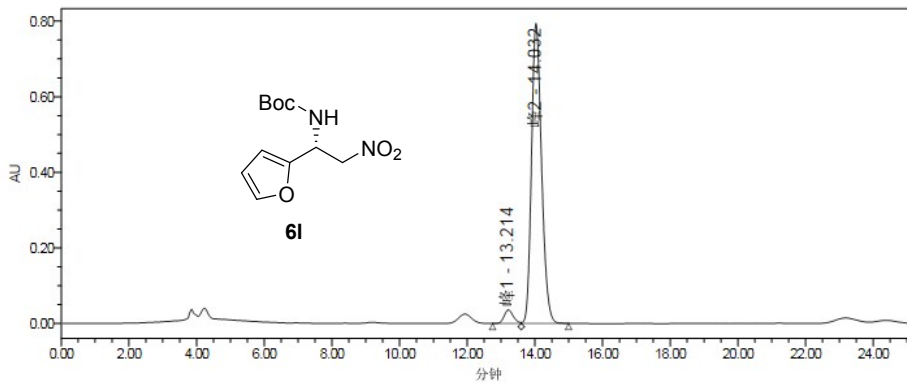

Channel: W2489 ChA; Channel Desc.: W2489 ChA 214nm; Processing Method: 0

| Channel Description | Peak Name | RT (min) | Area (磺*sec) | % Area | Height (磺) |
|---------------------|-----------|----------|--------------|--------|------------|
| W2489 ChA 214nm     | 峰1        | 13.214   | 677036       | 3.98   | 35791      |
| W2489 ChA 214nm     | 峰2        | 14.032   | 16352937     | 96.02  | 793479     |

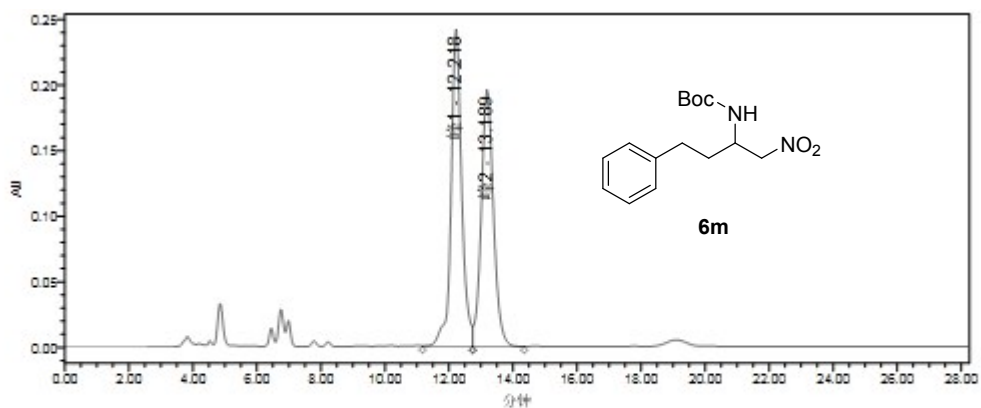

|   | Channel Description | Peak Name | RT (min) | Area (峰*sec) | % Area | Height (峰) |
|---|---------------------|-----------|----------|--------------|--------|------------|
| 1 | W2489 ChA 214nm     | 峰1        | 12.218   | 5598939      | 51.81  | 241508     |
| 2 | W2489 ChA 214nm     | 峰2        | 13.189   | 5207897      | 48.19  | 195538     |

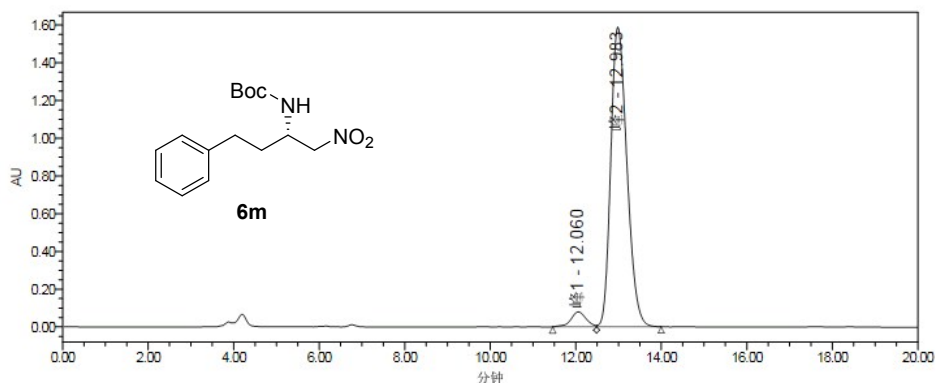

|   | Channel Description | Peak Name | RT (min) | Area (峰*sec) | % Area | Height (峰) |
|---|---------------------|-----------|----------|--------------|--------|------------|
| 1 | W2489 ChA 214nm     | 峰1        | 12.060   | 1952477      | 4.48   | 79298      |
| 2 | W2489 ChA 214nm     | 峰2        | 12.983   | 41663204     | 95.52  | 1587773    |

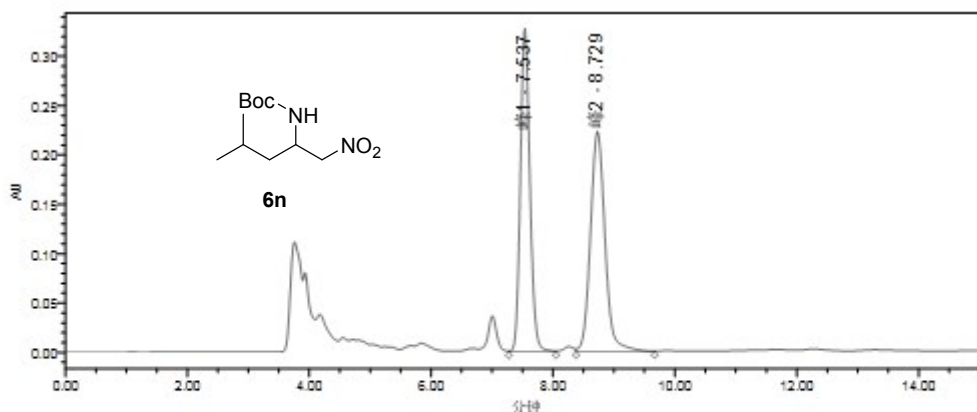

|   | Channel Description | Peak Name | RT (min) | Area (峰*sec) | % Area | Height (峰) |
|---|---------------------|-----------|----------|--------------|--------|------------|
| 1 | W2489 ChA 214nm     | 峰1        | 7.537    | 3548424      | 48.93  | 326494     |
| 2 | W2489 ChA 214nm     | 峰2        | 8.729    | 3700904      | 51.07  | 222461     |

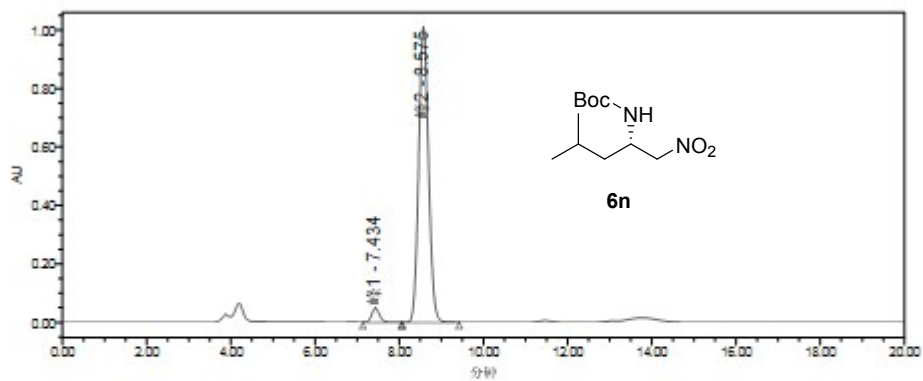

Channel: W2489 ChA; Channel Desc.: W2489 ChA 214nm; Processing Method: 0

|   | Channel Description | Peak Name | RT (min) | Area (AU*sec) | % Area | Height (AU) |
|---|---------------------|-----------|----------|---------------|--------|-------------|
| 1 | W2489 ChA 214nm     | 峰1        | 7.434    | 827251        | 3.69   | 49134       |
| 2 | W2489 ChA 214nm     | 峰2        | 8.575    | 1639111       | 96.31  | 1009428     |

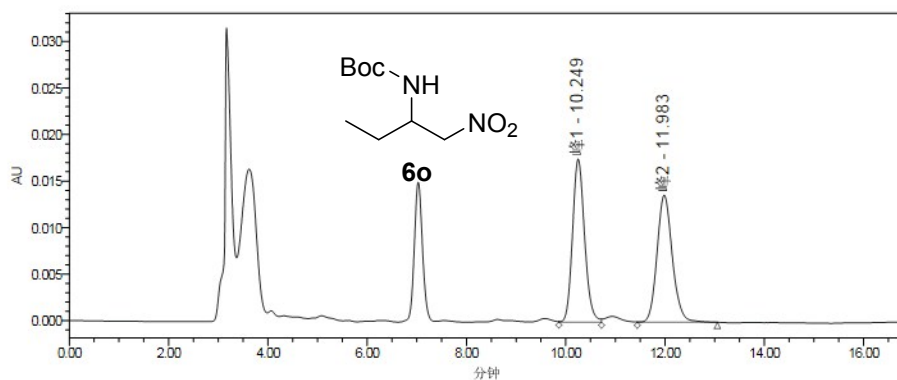

Channel: W2489 ChA; Channel Desc.: W2489 ChA 214nm; Processing Method: 0

|   | Channel Description | Peak Name | RT (min) | Area (AU*sec) | % Area | Height (AU) |
|---|---------------------|-----------|----------|---------------|--------|-------------|
| 1 | W2489 ChA 214nm     | 峰1        | 10.249   | 294759        | 50.15  | 17510       |
| 2 | W2489 ChA 214nm     | 峰2        | 11.983   | 293020        | 49.85  |             |

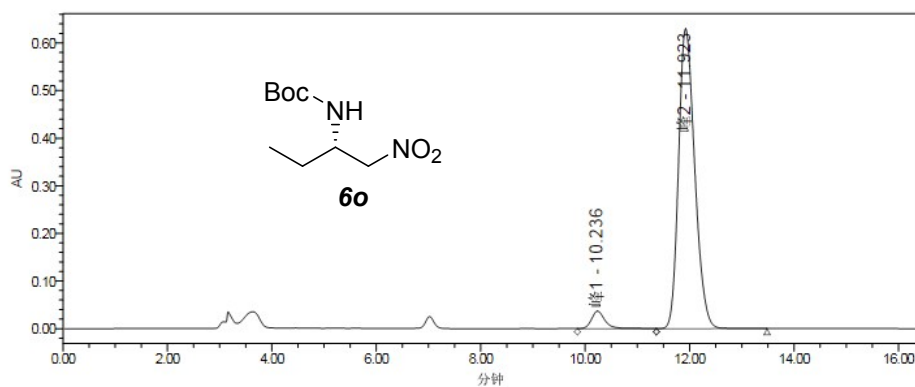

Channel: W2489 ChA; Channel Desc.: W2489 ChA 214nm; Processing Method: 0

|   | Channel Description | Peak Name | RT (min) | Area (AU*sec) | % Area | Height (AU) |
|---|---------------------|-----------|----------|---------------|--------|-------------|
| 1 | W2489 ChA 214nm     | 峰1        | 10.236   | 668001        | 4.70   | 36638       |
| 2 | W2489 ChA 214nm     | 峰2        | 11.923   | 13537102      | 95.30  | 629958      |

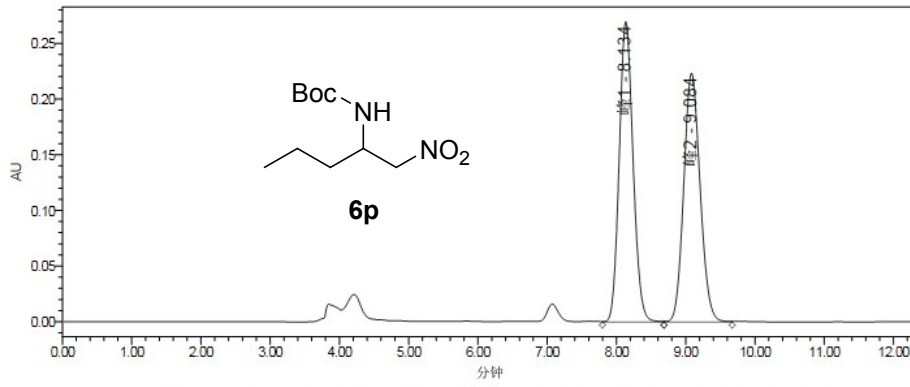

|   | Channel Description | Peak Name | RT (min) | Area (峰*sec) | % Area | Height (峰) |
|---|---------------------|-----------|----------|--------------|--------|------------|
| 1 | W2489 ChA 214nm     | 峰1        | 8.134    | 3737139      | 50.55  | 269360     |
| 2 | W2489 ChA 214nm     | 峰2        | 9.084    | 3655324      | 49.45  | 223213     |

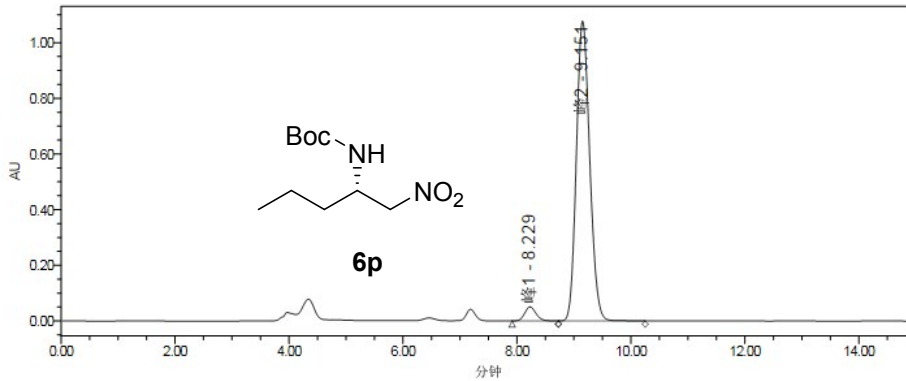

|   | Channel Description | Peak Name | RT (min) | Area (峰*sec) | % Area | Height (峰) |
|---|---------------------|-----------|----------|--------------|--------|------------|
| 1 | W2489 ChA 214nm     | 峰1        | 8.229    | 699098       | 3.83   | 50684      |
| 2 | W2489 ChA 214nm     | 峰2        | 9.151    | 17534173     | 96.17  | 1076759    |

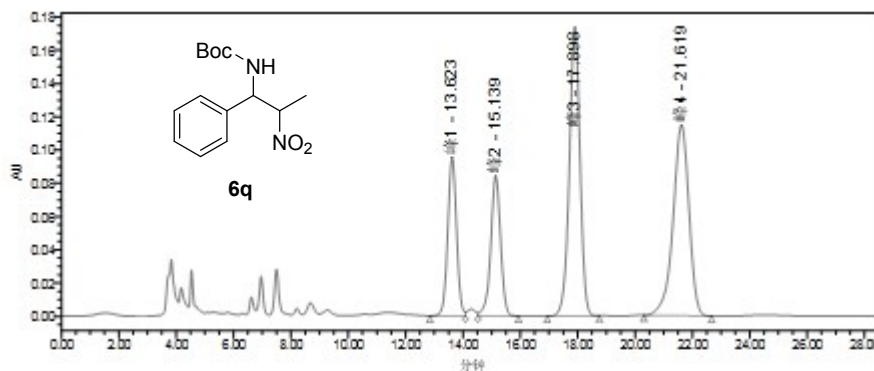

|   | Channel Description | Peak Name | RT (min) | Area (峰*sec) | % Area | Height (峰) |
|---|---------------------|-----------|----------|--------------|--------|------------|
| 1 | W2489 ChA 214nm     | 峰1        | 13.623   | 2038341      | 15.72  | 95317      |
| 2 | W2489 ChA 214nm     | 峰2        | 15.139   | 2010203      | 15.51  | 84058      |
| 3 | W2489 ChA 214nm     | 峰3        | 17.898   | 4493610      | 34.66  | 173560     |
| 4 | W2489 ChA 214nm     | 峰4        | 21.619   | 4420828      | 34.10  | 114607     |



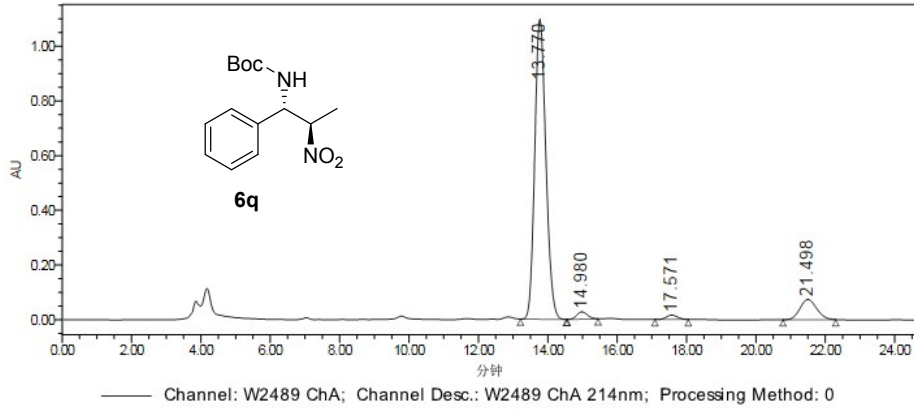

|   | Channel Description | RT (min) | Area (峰*sec) | % Area | Height (峰) |
|---|---------------------|----------|--------------|--------|------------|
| 1 | W2489 ChA 214nm     | 13.770   | 24375527     | 87.66  | 1095021    |
| 2 | W2489 ChA 214nm     | 14.980   | 564101       | 2.03   | 26934      |
| 3 | W2489 ChA 214nm     | 17.571   | 378142       | 1.36   | 16355      |
| 4 | W2489 ChA 214nm     | 21.498   | 2487944      | 8.95   | 74068      |

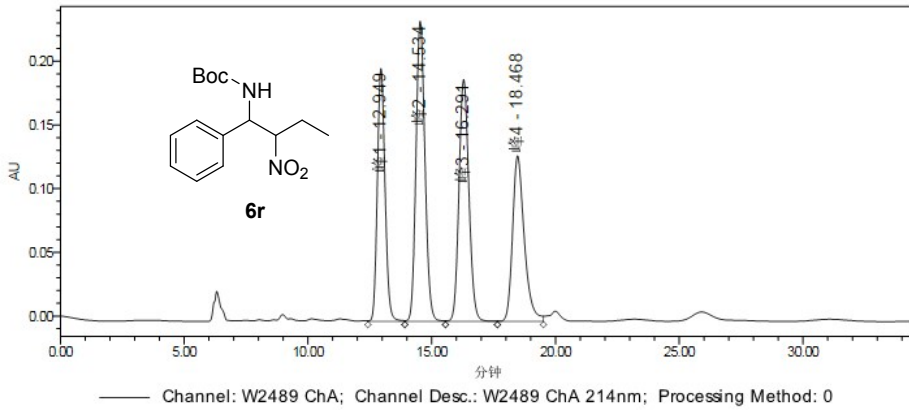

|   | Channel Description | Peak Name | RT (min) | Area (峰*sec) | % Area | Height (峰) |
|---|---------------------|-----------|----------|--------------|--------|------------|
| 1 | W2489 ChA 214nm     | 峰1        | 12.949   | 4281457      | 21.62  | 198366     |
| 2 | W2489 ChA 214nm     | 峰2        | 14.534   | 5947774      | 30.03  | 235440     |
| 3 | W2489 ChA 214nm     | 峰3        | 16.294   | 5283408      | 26.67  | 189869     |
| 4 | W2489 ChA 214nm     | 峰4        | 18.468   | 4294314      | 21.68  | 129961     |

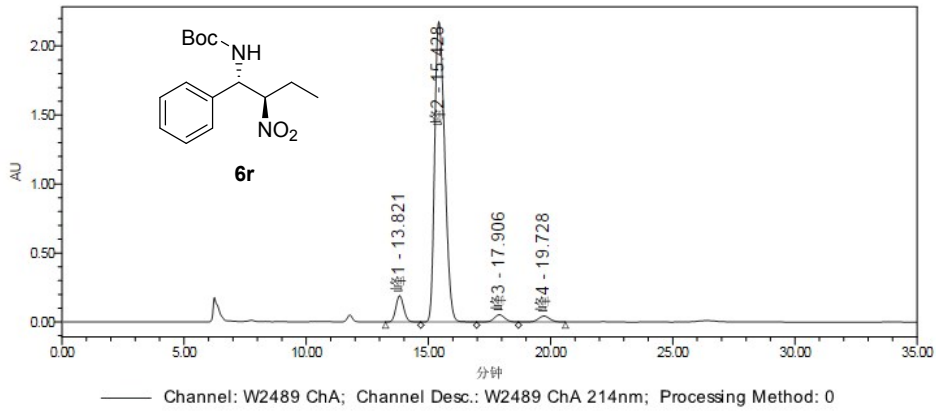

|   | Channel Description | Peak Name | RT (min) | Area (磺*sec) | % Area | Height (磺) |
|---|---------------------|-----------|----------|--------------|--------|------------|
| 1 | W2489 ChA 214nm     | 峰1        | 13.821   | 4225795      | 6.11   | 189568     |
| 2 | W2489 ChA 214nm     | 峰2        | 15.428   | 62003894     | 89.60  | 2175472    |
| 3 | W2489 ChA 214nm     | 峰3        | 17.906   | 1575954      | 2.28   | 52256      |
| 4 | W2489 ChA 214nm     | 峰4        | 19.728   | 1395783      | 2.02   | 42596      |

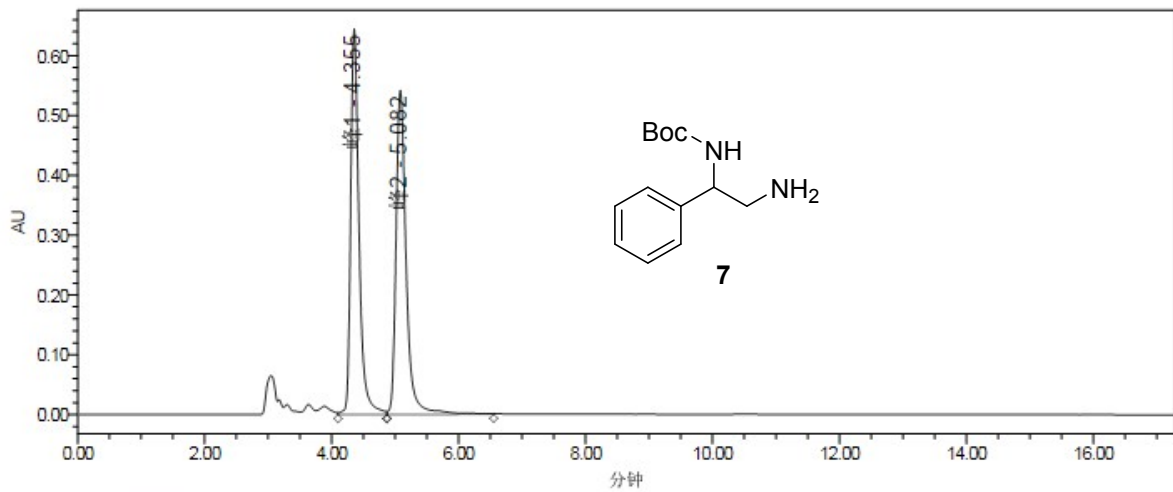

|   | Channel Description | Peak Name | RT (min) | Area (磺*sec) | % Area | Height (磺) |
|---|---------------------|-----------|----------|--------------|--------|------------|
| 1 | W2489 ChA 214nm     | 峰1        | 4.355    | 5888809      | 49.55  | 643613     |
| 2 | W2489 ChA 214nm     | 峰2        | 5.082    | 5994805      | 50.45  | 541266     |

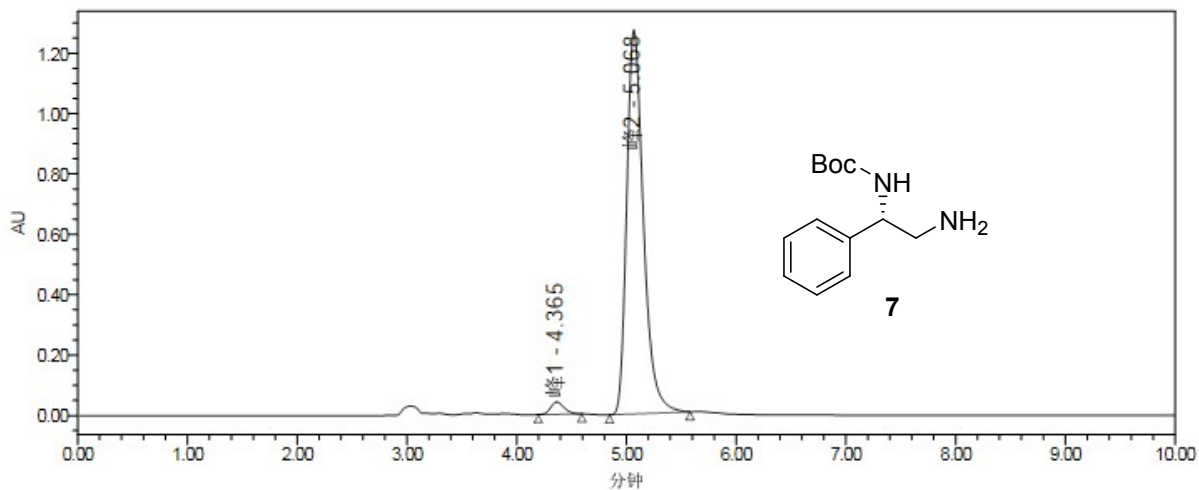

|   | Channel Description | Peak Name | RT (min) | Area (礦*sec) | % Area | Height (礦) |
|---|---------------------|-----------|----------|--------------|--------|------------|
| 1 | W2489 ChA 214nm     | 峰1        | 4.365    | 345541       | 2.51   | 40708      |
| 2 | W2489 ChA 214nm     | 峰2        | 5.068    | 13433747     | 97.49  | 1270712    |

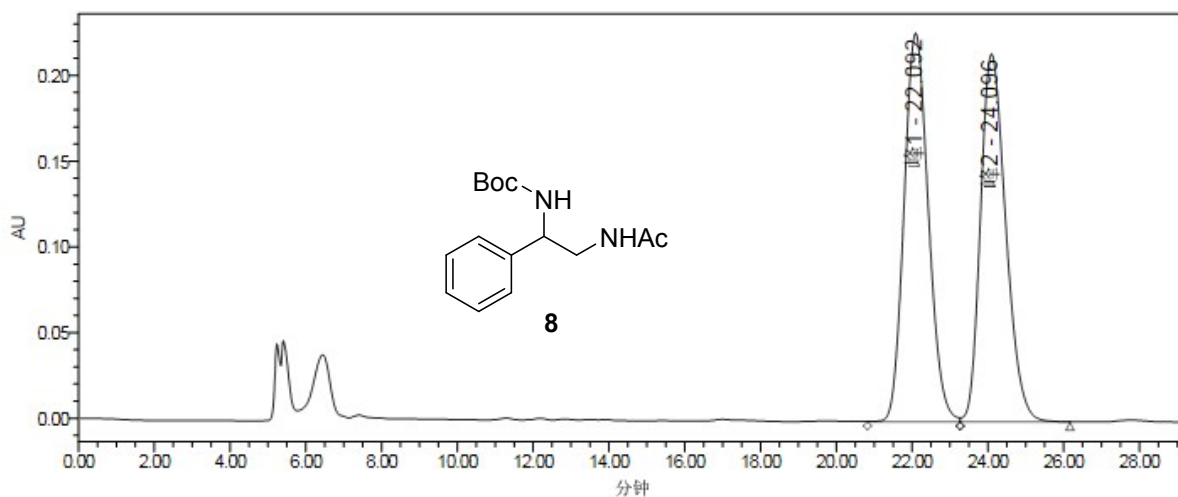

|   | Channel Description | Peak Name | RT (min) | Area (礦*sec) | % Area | Height (礦) |
|---|---------------------|-----------|----------|--------------|--------|------------|
| 1 | W2489 ChA 214nm     | 峰1        | 22.092   | 10075855     | 50.37  | 226569     |
| 2 | W2489 ChA 214nm     | 峰2        | 24.096   | 9929233      | 49.63  | 214540     |

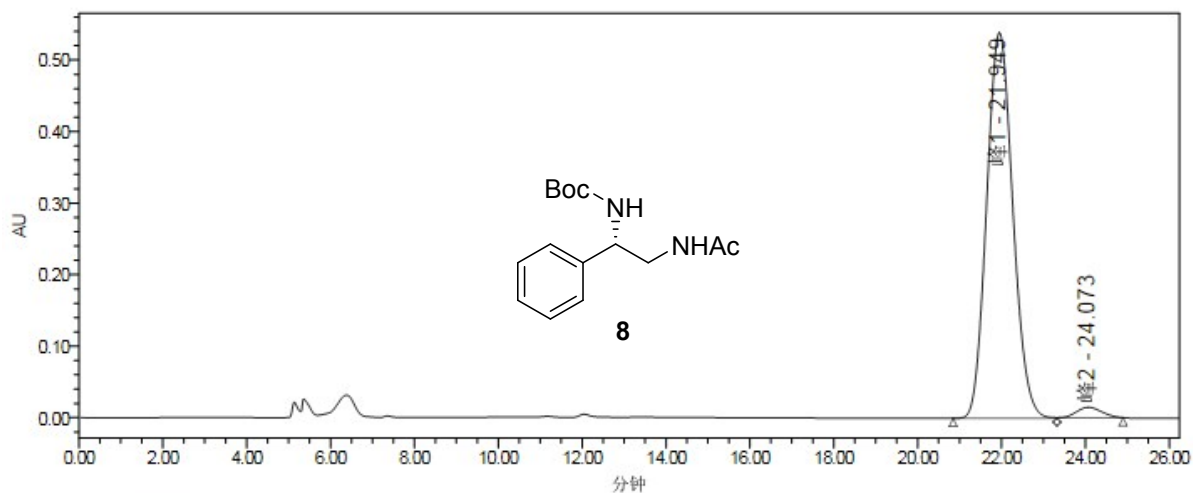

Channel: W2489 ChA; Channel Desc.: W2489 ChA 214nm; Processing Method: 0

|   | Channel Description | Peak Name | RT (min) | Area (磺*sec) | % Area | Height (磺) |
|---|---------------------|-----------|----------|--------------|--------|------------|
| 1 | W2489 ChA 214nm     | 峰1        | 21.949   | 23320592     | 97.41  | 538804     |
| 2 | W2489 ChA 214nm     | 峰2        | 24.073   | 620238       | 2.59   | 14683      |

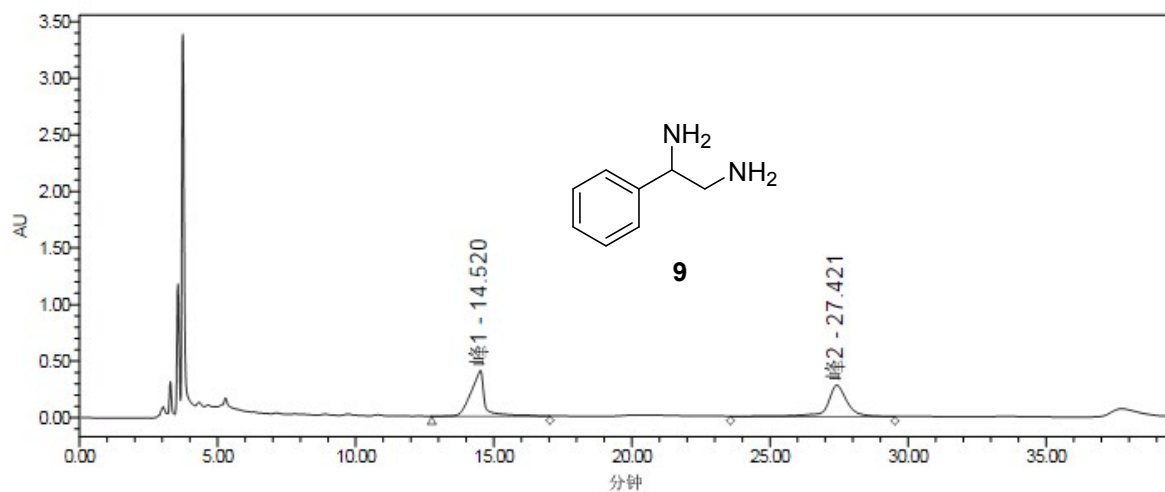

Channel: W2489 ChA; Channel Desc.: W2489 ChA 214nm; Processing Method: 0

|   | Channel Description | Peak Name | RT (min) | Area (磺*sec) | % Area | Height (磺) |
|---|---------------------|-----------|----------|--------------|--------|------------|
| 1 | W2489 ChA 214nm     | 峰1        | 14.520   | 14484626     | 50.20  | 402724     |
| 2 | W2489 ChA 214nm     | 峰2        | 27.421   | 14370527     | 49.80  | 278180     |

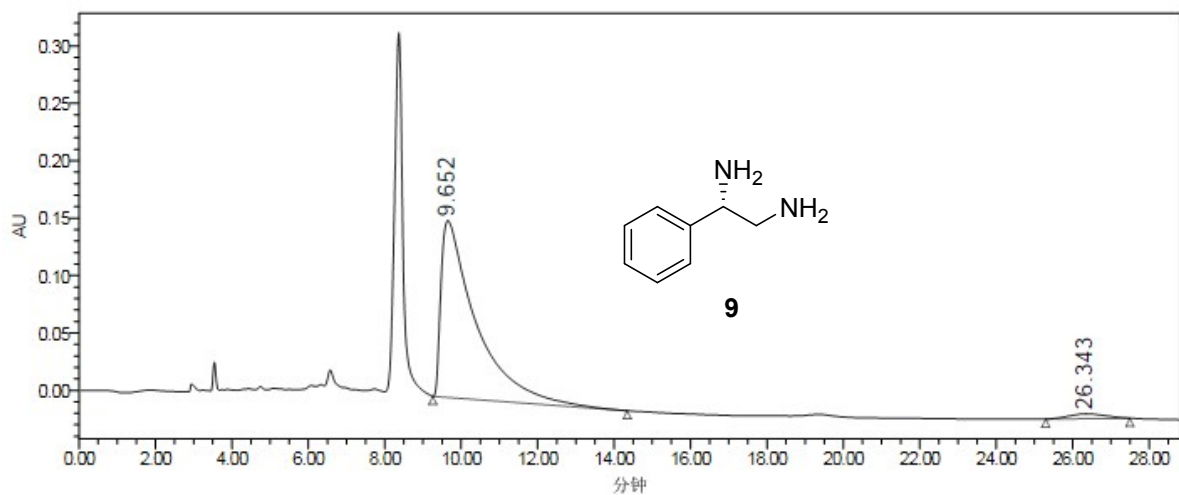

Channel: W2489 ChA; Channel Desc.: W2489 ChA 214nm; Processing Method: 0

|   | Channel Description | RT (min) | Area (峰*sec) | % Area | Height (峰) |
|---|---------------------|----------|--------------|--------|------------|
| 1 | W2489 ChA 214nm     | 9.652    | 9794284      | 97.25  | 154084     |
| 2 | W2489 ChA 214nm     | 26.343   | 276799       | 2.75   | 4105       |
